## Neuronal IL-17 controls *C. elegans* developmental diapause through p53/CEP-1

Abhishiktha Godthi<sup>1</sup>, Srijit Das<sup>1</sup>, Johnny Cruz-Corchado<sup>1</sup>, Andrew Deonarine<sup>1</sup>, Kara Misel-Wuchter<sup>2</sup>, Priya D. Issuree<sup>2</sup> and Veena Prahlad<sup>1, 3, \*</sup>

**Affiliations:** <sup>1</sup>Department of Biology,  
338 Biology Building East,  
143 Biology Building, Iowa City, IA 52242-1324.

<sup>2</sup>Department of Internal Medicine,  
503 Eckstein Medical Research Building,  
431 Newton Road, Iowa City, IA 52242

<sup>3</sup>Iowa Neuroscience Institute  
169 Newton Road, 2312 Pappajohn Biomedical Discovery Building  
Iowa City, IA 52242

\* Corresponding author email: [veena-prahlad@uiowa.edu](mailto:veena-prahlad@uiowa.edu)

1    **Abstract:** Metazoan growth and development requires the coordination of cell cycle progression  
2    and metabolism with nutrient availability<sup>1-3</sup>. Here, we show that in *C. elegans*, amphid neurons  
3    regulate the animals' developmental decision to continue reproductive growth or arrest as  
4    quiescent dauer larvae in response to food, by controlling the activity of *C. elegans* p53-like  
5    ortholog, CEP-1. Specifically, upon food availability, larval neurons secrete a mammalian IL-17  
6    ortholog, ILC-17.1, and ILC-17.1 signaling is needed for *C. elegans* to progress through  
7    development into reproductive adults. ILC-17.1 deficiency activates CEP-1/p53 in larval blast  
8    cells, and causes larvae to arrest as stress-resistant, quiescent dauers by activating DAF-  
9    16/FOXO, decreasing cytochrome C levels, decreasing glucose utilization, and upregulating cell  
10   cycle inhibitors. Increasing ILC-17.1 levels represses CEP-1/p53 and promotes anabolic growth,  
11   but also inhibits apoptosis upon genotoxic stress. IL-17 also represses p53 in human epithelial  
12   cells. These studies describe a role for the tumor suppressor p53-like proteins in controlling  
13   developmental quiescence of a metazoan in response to neuronal activity and immunometabolic  
14   signals and are relevant to our understanding of neuroimmune mechanisms in cancer. This novel  
15   role for p53-like proteins in *C. elegans* supports the argument that their developmental function  
16   was a main driving force in their evolution<sup>4,5</sup>.  
17

18 **Main**

19 During the development of a multicellular organism, nutrient availability is coordinated with the  
20 division, growth and metabolic activity of cells through cell-cell communication<sup>6</sup>. Cytokines are a  
21 group of secreted proteins that coordinate communication between immune and non-immune  
22 cells through paracrine or endocrine signaling mechanisms<sup>7,8</sup>. The IL-17 cytokines are an  
23 evolutionarily conserved family of proinflammatory cytokines released by specialized immune  
24 cells, at sites such as epithelia that serve as an interface between the organism and the outside  
25 world<sup>9,10</sup>. In humans, IL-17 cytokines act on IL-17 receptor expressing cells to activate immune  
26 surveillance, barrier function and wound healing, but can trigger autoimmune conditions such as  
27 psoriasis and multiple sclerosis and contribute to the growth and metastasis of cancers<sup>9,11-13</sup>. In  
28 *C. elegans* too, one of three of IL-17 orthologs<sup>14,15</sup>, ILC-17.1 is expressed by cells with epithelial  
29 properties, i.e. by a subset of specialized neurons called amphid neurons that sense information  
30 from the environment<sup>16,17</sup>.

31  
32 Here we show that ILC-17.1 is secreted upon exposure to food and controls CEP-1, the *C.*  
33 *elegans* ortholog of the mammalian tumor suppressor p53, to coordinate cell cycle progression  
34 and glucose utilization with food availability during *C. elegans* development. ILC-17.1 is necessary  
35 to repress CEP-1/p53 and allow *C. elegans* larvae to progress through development into  
36 reproductive adults. In the absence of ILC-17.1, CEP-1/p53 is activated, accumulates in  
37 progenitor blast cells of larvae, and alters the expression of cell cycle inhibitors and metabolic  
38 enzymes, causing larvae to arrest growth and development in an alternative, hypometabolic,  
39 quiescent state called dauer.

40  
41 The p53-like tumor suppressor genes are found in all multicellular animals, where they prevent  
42 the propagation of damaged DNA by triggering apoptosis of germ line cells that accrue DNA  
43 damage, thus maintaining the fidelity of the species<sup>4,5,18,19</sup>. This function of the p53-family of

44 proteins is thought to be the main driving force in their evolution. This is largely because, although  
45 p53-like genes affect vertebrate development<sup>4,5,18</sup>, cell competition<sup>20,21</sup>, and stem cell  
46 differentiation<sup>22,23</sup> through as yet poorly understood mechanisms, in invertebrates such as *D.*  
47 *melanogaster* and *C. elegans* the function of the p53-gene family has been restricted to regulating  
48 apoptosis. Here we show, for the first time, a novel role for CEP-1/p53 in controlling  
49 developmental quiescence of *C. elegans*. Our studies showing that CEP-1/p53 acts to switch  
50 metazoan development between continuous growth and dormancy, support an alternative  
51 possibility that the role of p53-like proteins in coordinating cell quiescence with metabolism during  
52 development in response to environmental signals, could have shaped the evolution of this  
53 important gene family<sup>24</sup>.

54

55 **ILC-17.1 is secreted from *C. elegans* amphid neurons in response to food and prevents**  
56 **dauer arrest.**

57 *C. elegans* is a bacterivore. When *C. elegans* larvae hatch under optimal conditions (e.g., in the  
58 laboratory at 20°C, on abundant food provided by lawns of *E. coli* strain, OP50) they progress  
59 through development and become reproductive adults. However, if they hatch under suboptimal  
60 conditions, such as in the paucity of food, at high population densities, or high ambient  
61 temperatures, larvae implement an alternative developmental decision to arrest growth as  
62 quiescent, stress resistant, dauer larvae adapted for dispersal. Animals then resume development  
63 when conditions are favorable again<sup>25,26</sup>. We discovered that a deletion of *ilc-17.1*, syb5296, that  
64 removes almost all the coding sequence (2188 bp of 2980 bp; Supplementary Fig. S1a) and  
65 abolishes mRNA expression (Supplementary Fig. S1b) caused larvae to constitutively enter the  
66 dauer state even under optimal growth conditions (Supplementary Fig. S1c-d). Dauer larvae can  
67 be identified by their distinct morphology, growth arrest, and resistance to detergent (1% SDS)  
68 due to changes in their cuticle and the presence of a buccal plug that inhibits ingestion<sup>26</sup>.  
69 Approximately 30% (31.2 ±5%) of *ilc-17.1*(syb5296) X larvae were SDS-resistant 48 hours post-

70 hatching on OP50 at 20°C (Supplementary Fig. S1 c, d). In contrast, under the same conditions,  
71 none of the wildtype larvae were detergent resistant, nor did they arrest as dauers  
72 (Supplementary Fig. S1c, d). Under these optimal conditions, dauer entry of the *ilc-17.1* deleted  
73 larvae was transient and most larvae exited dauer within 72 hours and continued development to  
74 become reproductive adults, also confirmed by their susceptibility to 1% SDS (Supplementary  
75 Fig. S1c, d). However, as with other mutations that promote dauer entry<sup>25-27</sup>, the dauer arrest of  
76 *ilc-17.1* deletion mutants persisted at the slightly more stressful ambient temperature of 25°C,  
77 which still supported the growth of wild-type animals into reproductive adults, but caused  
78 practically all larvae lacking *ilc-17.1* to enter and remain arrested as dauer larvae (Fig.1a-c;  
79 Supplementary Fig. S1e).

80

81 As previously reported, *ilc-17.1* mRNA is expressed only in amphid neurons<sup>14</sup>, which we  
82 confirmed by expressing mCherry as a bicistronic SL2 cassette along with the endogenous *ilc-*  
83 *17.1* gene to report on sites of *ilc-17.1* expression (Supplementary Fig. S1f). The dauer phenotype  
84 could be rescued by re-expressing *ilc-17.1* in *ilc-17.1* deletion mutants, under the control of its  
85 own promoter and 3' UTR regions (Fig.1b, expression levels of rescue constructs in  
86 Supplementary Fig. S1g). To determine whether ILC-17.1 acted in a paracrine or endocrine  
87 manner to promote continuous development, we also expressed ILC-17.1 ectopically in the body  
88 wall muscle cells of *ilc-17.1* deleted larvae, under the *unc-54* promoter, (Supplementary Fig. S1g,  
89 h) and asked whether this could rescue the dauer phenotype of these deletion mutants. This was  
90 the case (Fig.1b), and in fact, ectopic ILC-17.1 expressed at two-fold higher levels from the muscle  
91 promoter than from the endogenous promoter (Supplementary Fig. S1g), prevented a larger  
92 fraction of *ilc-17.1* deletion mutant larvae from arresting as dauers (Fig.1b). Thus, it appeared that  
93 ILC-17.1 was likely secreted to exert its systemic effects.

94

95 IL-17 cytokines signal through cytokine receptors<sup>9</sup> which in *C. elegans* are encoded by the *ilcr-1*  
96 and *ilcr-2* genes<sup>14</sup>, and the ILCR-2 receptor is expressed in practically all tissues, also determined  
97 using a bicistronic SL2 cassette to tag the *ilcr-2* receptor at its endogenous locus with GFP  
98 (Supplementary Fig. S1i). RNAi mediated downregulation of *ilcr-2* reduced the percentage of *ilc-*  
99 *17.1* larvae that were rescued from dauer arrest by overexpressing ILC-17.1 in the muscle,  
100 indicating that ectopic ILC-17.1 acted through the ILCR-2 receptors to promote continuous  
101 development (Fig. 1d). More importantly, *ilcr-2* downregulation through RNAi caused  
102 approximately half ( $51.05 \pm 9\%$ ) of the wild-type (N2) animals to arrest as dauers (Fig. 1d).  
103 Together, these observations indicated that during normal development, ILC-17.1 signaling  
104 through the ubiquitously expressed ILCR-2 receptors was required for growth of larvae to  
105 reproducing adults; in the absence of ILC-17.1, larvae arrested growth and entered the dauer  
106 state, transiently, or for prolonged durations.

107  
108 Because the dauer diapause decision is made during the first two larval stages, and because  
109 nutrient availability is a major factor in the dauer decision<sup>25,26</sup>, we asked whether ILC-17.1 was  
110 normally secreted by larvae in response to food. To do this we immunolocalized ILC-17.1 protein  
111 in *C. elegans* larvae expressing endogenous HA-tagged ILC-17.1 and examined its tissue  
112 distribution in the presence or absence of food (Fig. 1e). While *ilc-17.1* mRNA expression  
113 remained restricted to the amphid neurons both in the presence and absence of food, as detected  
114 by mCherry expression (Fig. 1e; left), ILC-17.1 protein was present outside the amphid neurons  
115 in the pharynx when larvae were exposed to food (OP50), but not when larvae hatched in the  
116 absence of food (Fig.1e; right). In addition, ectopically expressed ILC-17.1 protein, even when  
117 expressed under a muscle-specific promoter (Supplementary Fig. S1h), could be detected  
118 throughout the animal, outside muscle cells, at neurons and other tissue (Supplementary Fig.S1j),  
119 confirming that ILC-17.1 could indeed be secreted under normal conditions, to act systemically  
120 and promote the continuous development of larvae.

121  
122 RNA-seq analysis of total RNA extracted from bleach synchronized larvae grown for 30-34 hours  
123 at 25°C confirmed that, as might be expected of larvae entering dauer diapause<sup>28,29</sup>, *ilc-17* deleted  
124 larvae had downregulated anabolic processes and upregulated catabolic processes  
125 (Supplementary Fig. S2, a-c; Supplementary Table 1-3). Thus, DNA replication and ribosome  
126 biogenesis were downregulated when compared to wild-type animals, or larvae rescued from  
127 dauer arrest by *ilc-17.1* overexpression in muscle cells (Supplementary Fig. S2b;). On the other  
128 hand, autophagy, fatty acid metabolism, and stress responses such as glutathione metabolism  
129 and xenobiotic defense pathways were upregulated (Supplementary Fig. S2c). At this time point,  
130 *ilc-17.1* mutant larvae were not phenotypically identifiable as dauers although the dauer decision  
131 would have been made<sup>30,31</sup> and wild-type larvae were in late larval stage 2 (L2) or early larval  
132 stage 3 (L3) of development. To evaluate the extent to which the *ilc-17.1* deleted dauers were  
133 similar to previously described *C. elegans* dauers that accumulate in the population upon  
134 starvation, we compared the gene expression changes in *ilc-17.1* mutant larvae *en route* to arrest  
135 as dauers, with previously published gene expression changes in dauer larvae collected from  
136 starved plates<sup>32</sup> (Supplementary Fig. S2 d). Indeed, the global gene expression profile of *ilc-17.1*  
137 deletion mutants as they entered dauer was significantly, although modestly, correlated with the  
138 gene expression changes in dauer larvae obtained upon starvation (Supplementary Fig. S2d;  
139 Supplementary Table 4). Dauer larvae are known to upregulate specific collagen genes that differ  
140 from the collagens expressed by larvae undergoing continuous development<sup>33</sup>. The increase in  
141 expression of these specific dauer- signature collagen genes was recapitulated in *ilc-17.1* larvae  
142 during dauer entry (Supplementary Fig. S2 e).

143  
144 Given the previously described role of ILC-17.1 as a neuromodulator<sup>14</sup> we first suspected that the  
145 secretion of ILC-17.1 functioned to modulate the animals' sensory perception of food, or their  
146 feeding behavior. However, we found no evidence to support this (Supplementary Fig. S3): *ilc-*

147 17.1 deleted animals did not exhibit changes in chemotaxis towards lawns of OP50, or towards  
148 organic molecules like lysine or diacetyl thought to mimic the presence of bacteria  
149 (Supplementary Fig. S3a). Animals lacking ILC-17.1 were also able to feed like wild-type animals,  
150 and the rate of pharyngeal pumping, a measure that is typically correlated with food uptake, was  
151 the same in wild-type animals and animals lacking ILC-17.1, both in the presence and absence  
152 of food (Supplementary Fig. S3b). Also, prior to their dauer entry, *ilc-17.1* deletion mutants  
153 accumulated slightly, but not significantly fewer numbers of red latex beads in their intestinal  
154 lumen that served as a proxy for rates of bacterial ingestion (Supplementary Fig. S3c). These  
155 data suggested that *ilc-17.1* deficient larvae arrested development and entered a dauer diapause  
156 state despite being able to ingest nutrients.

157

158 In mammals, cytokines regulate facilitated glucose uptake into cells by glucose transporters<sup>34-38</sup>.  
159 Likewise, in *C. elegans* ILC-17.1 was also required for larvae to utilize the normal amounts of  
160 glucose available through their diets. Thus, while almost all *ilc-17* deletion larvae arrested as  
161 dauers on normal diets of OP50, half or more larvae could escape dauer arrest and grow into  
162 reproductive adults if their diets were supplemented with extra glucose (Fig. 1f; Supplementary  
163 Fig. S4a). Importantly, no rescue from dauer was observed on the non-hydrolyzable glucose  
164 analog 2-Deoxy-d-glucose (2-DOG; Fig. 1f) which cannot undergo glycolysis and does not enter  
165 the metabolic pathway, suggesting that utilization of the supplemented glucose was required for  
166 the rescue. In further support that glucose utilization was responsible for the dauer rescue, as  
167 opposed to other non-specific effects of glucose, we found that the glucose rescue was not  
168 inhibited by the mitochondria-targeted antioxidant, Mito-Tempo, that scavenges mitochondrial  
169 reactive oxygen species, ROS, known to be increased under glucose-rich diets<sup>39,40</sup>  
170 (Supplementary Fig. S4b). Nor was the rescue a non-specific effect of nutritional supplementation,  
171 as L-glutamine, another important carbon source for metabolism<sup>41</sup>, or skim milk powder that can  
172 be ingested by *C. elegans*<sup>41</sup>, did not suppress the dauer arrest of *ilc-17.1* larvae (Supplementary



173 Fig. S4c). Moreover, RNAi mediated downregulation of *fgt-1* the main glucose transporter (GLUT)  
174 responsible for glucose absorption in *C. elegans*<sup>42</sup> decreased the percentage of *ilc-17.1* deletion  
175 mutants that were rescued from dauer arrest by glucose supplementation (Supplementary Fig.  
176 S4d). Thus, even though *ilc-17.1* deletion mutants expressed normal mRNA levels of the putative  
177 GLUT orthologs including *fgt-1* (Supplementary Fig. S4e), the lack of ILC-17.1 was in some way  
178 decreasing glucose utilization by *ilc-17.1* larvae compared to wild-type animals.

179  
180 These data together suggested that ILC-17.1 was not required for animals to find food, but its  
181 secretion signaled the presence of food in wild-type animals and was required to promote glucose  
182 utilization by the animal to support their growth. The lack of ILC-17.1, somehow, prevented  
183 continued development and instead activated a developmental switch that prompted *C. elegans*  
184 to arrest development as hypometabolic, stress resistant, dauer stage larvae.

185  
186 **ILC-17.1 loss activates CEP-1/p53 to induce DAF-16/FOXO and trigger dauer arrest.**

187 In *C. elegans*, signal transduction pathways that predispose larvae to arrest as dauers, converge  
188 on the activation of the forkhead box transcription factors class O (FOXO) homolog, DAF-16<sup>25,43-</sup>  
189 <sup>46</sup>. Indeed, DAF-16 was activated in *ilc-17.1* deletion mutant larvae. This could be quantified by  
190 an increase in the number of DAF-16::GFP positive nuclei in the intestine of the *ilc-17.1* deletion  
191 mutants even at 20°C (Fig.1g), and the upregulation of DAF-16 target genes in *ilc-17.1* larvae,  
192 both at 20°C (Supplementary Fig. S5a) and 25°C (Fig.1h). Furthermore, a *daf-16* mutation, mu86,  
193 completely suppressed the dauer entry of animals lacking ILC-17.1 and abrogated the  
194 upregulation of *daf-16* targets genes, confirming that DAF-16 activation was responsible for their  
195 dauer entry (Supplementary Fig. S5a, Fig.1h, Fig. 1i, j).

196  
197 Insulin signaling is one of the main mechanisms that promotes glucose uptake into cells, and  
198 reduced insulin signaling decreases glucose utilization and activates DAF-16 in *C.*

199 *elegans*<sup>25,43,44,47</sup>. However, ILC-17.1 did not appear to be acting through the insulin signaling  
200 pathway to activate DAF-16, as supported by the following observations: (i) expression levels of  
201 the insulin receptor *daf-2* mRNA did not differ between *ilc-17.1* deletion mutants, wild-type  
202 animals, and rescued *ilc-17.1* deletion mutants (Supplementary Fig. S5b; boxed; Supplementary  
203 Table 5), (ii) the dauer arrest of a mutation in the insulin receptor, *daf-2(e1370)*, could not be  
204 rescued by ILC-17.1 overexpression, indicating that ILC-17.1 was not acting downstream of the  
205 insulin receptor (Supplementary Fig. 5c), (iii) the expression levels of the 28 insulin ligands  
206 including the three main insulins, *ins-4*, *ins-6* and *daf-28*, whose downregulation promotes dauer  
207 arrest<sup>48,49</sup>, were not decreased, and *ins-4* mRNA levels were even slightly higher in *ilc-17.1*  
208 deleted larvae compared to wild-type animals (Supplementary Fig. S5b, d), (iv) the expression  
209 of *ins-1* and *ins-18*<sup>47,48,50</sup>, whose upregulation has been shown to antagonize *daf-2* signaling and  
210 increase dauer propensity, were not increased (Supplementary Fig. S5b; arrows), (v) the  
211 expression of insulin peptides INS-4 and DAF-28 themselves were also not altered in larvae  
212 deficient in *ilc-17.1*, as seen using larvae expressing a GFP translational reporter of these insulin  
213 ligands (Supplementary Fig. S5e, f).

214  
215 Since AMP-activated protein kinase (APMK) can be activated by glucose starvation<sup>51,52</sup> and can,  
216 in turn, activate DAF-16, we asked whether AMPK activation was responsible for the dauer arrest.  
217 However, knocking down the AMPK subunits *aak-1*, or *aak-2* or the *C. elegans* LKB1 homolog  
218 *par-4*, required for phosphorylation of AMPK did not rescue the dauer phenotype of *ilc-17.1*  
219 mutants (Supplementary Fig. S6a). In addition, Phospho-AMPK (Thr172)<sup>53</sup> levels were not higher  
220 in *ilc-17.1* mutant larvae prior to their dauer entry compared to wild-type larvae as determined by  
221 Western blot analysis (Supplementary Fig. S6b), suggesting that notwithstanding their decreased  
222 glucose metabolism, AMPK was unlikely to be responsible for the dauer arrest in *ilc-17.1* deletion  
223 mutants.

224

225 In *C. elegans*, pathways that modulate dauer have been extensively characterized. Therefore, to  
226 identify the mechanism(s) in *ilc-17.1* deleted larvae that led to DAF-16 activation, decreased  
227 glucose utilization and dauer arrest, we conducted RNAi to downregulate other known signaling  
228 pathways that could interact with DAF-16<sup>54-58</sup>, or influence dauer formation, and assessed whether  
229 they rescued the dauer phenotype (Supplementary Fig. S6a). However, RNAi mediated  
230 modulation of most of the obvious pathways had little to no effect. For instance, decreasing *jnk-1*  
231 did not rescue dauer arrest of the *ilc-17.1* deleted animals (Supplementary Fig. S6a). Neither did  
232 RNAi mediated decrease nor increase of SKN-1 activity, the *C. elegans* ortholog of the  
233 mammalian Nrf1/2/3 (NF-E2-related factor) proteins<sup>59</sup>. HIF-1 levels were slightly higher in *ilc-17.1*  
234 animals (Supplementary Fig. S6c); however, the downregulation of *hif-1* or its negative regulators,  
235 *vhl-1*, and *egl-9*, did not suppress the dauer arrest (Supplementary Fig. S6a). For these  
236 experiments we used *daf-16* RNAi as a positive control. We therefore proceeded to test less well-  
237 characterized DAF-16-interactors in *C. elegans*<sup>60-63</sup>. Remarkably, amongst these, the deletion in  
238 *cep-1*, the *C. elegans* ortholog of p53<sup>34,60,64,65</sup> completely rescued the dauer arrest of *ilc-17.1*  
239 deletion mutants and nearly all (98%) of *ilc-17.1*(*syb5296*) X; *cep-1*(*gk138*) I double mutant larvae  
240 grew into reproductive adults, suggesting that CEP-1/p53 was activated in the absence of ILC-  
241 17.1 to trigger dauer arrest (Fig. 2a).

242

243 Although p53 is best studied as a tumor suppressor, p53-like proteins modulate vertebrate  
244 development through as yet poorly understood mechanisms<sup>4,5,18,19,23</sup>. The *C. elegans* p53  
245 ortholog, *cep-1* has not been previously implicated in *C. elegans* development<sup>65</sup>. Nevertheless,  
246 consistent with the dauer rescue of *ilc-17.1* larvae upon *cep-1* deletion, the overexpression of  
247 CEP-1 alone was sufficient to arrest growth and promote an almost completely penetrant dauer  
248 phenotype in larvae that developed at 25°C (Fig. 2b, c; see Supplementary Fig. S6d for mRNA  
249 levels upon *cep-1* overexpression). CEP-1 overexpression was achieved by expressing a  
250 functional, fluorescently tagged CEP-1, CEP-1::GFP, that was able to complement a *cep-1*

251 deletion, *cep-1(lg12501)*,<sup>66-68</sup> as a genomically integrated multicopy array in a wildtype  
252 background. CEP-1/p53 overexpression not only caused dauer arrest at 25°C, but also prompted  
253 larvae to transiently enter dauer at 20°C, as seen by their SDS-resistance, phenocopying the *ilc-*  
254 *17.1* deletion (Supplementary Fig. S6e). Like in the ILC-17.1 deficient animals, the dauer arrest  
255 of larvae overexpressing CEP-1 was also dependent on DAF-16: downregulating *daf-16*  
256 expression by RNAi rescued the dauer arrest caused by CEP-1/p53 overexpression (Fig. 2c), and  
257 *daf-16* target genes were upregulated in larvae overexpressing CEP-1/p53 (Fig 2e). Most  
258 convincing, the upregulation of *daf-16* target genes in *ilc-71.1* deletion mutant larvae was *cep-1*  
259 dependent at both 25°C and 20°C (Fig 2e; Supplementary Fig. S6f). CEP-1/p53 induced dauer  
260 entry appeared to be somewhat specific to reduced ILC-17.1 signaling, as the dauer arrest of *daf-*  
261 *2(e1370)* III did not depend on *cep-1* and *daf-2* mutant animals continued to arrest as dauers in  
262 a *cep-1* deletion, *cep-1(gk138)* I, background (Supplementary Fig. S6g). Moreover, in agreement  
263 with previous reports<sup>69,70</sup>, *cep-1* was not required for dauer induction at high temperatures as *cep-*  
264 *1(gk138)* I larvae could enter dauer at 27°C just like wild-type animals (Supplementary Fig. S6h).  
265

266 The BH3-only proteins *egl-1* and *ced-13* are known targets of CEP-1/p53 that are upregulated  
267 during somatic programmed cell death that occurs during development, and DNA-damage  
268 induced germline cell death that occurs in adults upon exposure to ionizing radiation<sup>71-74</sup>. To  
269 confirm that CEP-1/p53 was activated in the absence of ILC-17.1, we tested whether these genes  
270 were upregulated *ilc-17.1* deleted larvae in a CEP-1/p53 dependent manner. As could be  
271 expected, *egl-1* and *ced-13* mRNA levels were upregulated upon CEP-1/p53 overexpression in  
272 larvae at both 20°C (Supplementary Fig. S7a) and 25°C (Fig 2f). Both *egl-1* and *ced-13* were also  
273 upregulated in *ilc-17.1* deletion mutants, and this upregulation was *cep-1* dependent  
274 (Supplementary Fig. S7a; Fig 2f). Chromatin Immunoprecipitation followed by quantitative PCR  
275 (ChIP-qPCR) using animals carrying an endogenous CRISPR/Cas9 FLAG tagged *cep-1* showed  
276 that more CEP-1/p53 was bound to the promoter regions of *egl-1* and *ced-13* in larvae lacking *ilc-*

277 17.1 when compared to wild-type larvae, and the increased occupancy was abrogated when *ilc-*  
278 17.1 deletion mutants were rescued from dauer arrest by the overexpression of ILC-17.1 in  
279 muscle cells (Fig. 2g). These data together confirmed that CEP-1/p53 was activated upon loss of  
280 ILC-17.1 signaling, and overexpressing ILC-17.1 in an *ilc-17.1* deletion suppressed this activation.

281

282 In mammalian cells, activation of p53 in response to stress increases p53 protein levels through  
283 its phosphorylation which allows p53 to escape constitutive degradation mediated by the E3  
284 ubiquitin ligase MDM2<sup>4,5,75</sup>. *C. elegans* genome lacks MDM2 orthologs, but nevertheless CEP-  
285 1/p53 has been shown to undergo translational and posttranslational modifications<sup>68,76</sup>, although  
286 the mechanism of its activation remains incompletely understood. Western analysis of FLAG-  
287 tagged endogenous CEP-1/p53 in *C. elegans* showed that CEP-1: FLAG expression was  
288 increased in larvae lacking *ilc-17.1*, as seen upon gamma irradiation of animals at doses known  
289 to activate CEP-1/p53, and what has been observed in mammalian cells (Fig 2h).

290

291 **CEP-1/p53 localizes to progenitor blast cells (P cells) in larvae prior to their dauer entry,**  
292 **and directly or indirectly activates a quiescence program.**

293 During *C. elegans* development, most cell divisions are completed during embryogenesis, but a  
294 subset of somatic and germline multipotent progenitor or blast cells continue to divide post-  
295 embryonically to generate adult tissues such as the gonad, neurons and epidermal cells<sup>77-81</sup>.  
296 When larvae arrest as dauers, these cells do not divide, but are maintained in their multipotent  
297 state for extended periods of time, and resume division only when larvae continue their postdauer  
298 development<sup>77-81</sup>. In the mammalian hematopoietic system, p53 has been shown to be required  
299 to maintain stem cells in a quiescent state through its regulation of negative regulators of the cell  
300 cycle<sup>82,83</sup>. This is also true of p53 in its role as tumor suppressor, where it restrains cell growth  
301 and promotes cell cycle arrest through the transcription of p21<sup>WAF1</sup> cell cycle inhibitors and other  
302 proteins<sup>5,18,19,84</sup>. We therefore reasoned that the activation of CEP-1/p53 that occurred upon loss

303 of ILC-17.1 signaling that normally signified the presence of food, could serve as a mechanism to  
304 link cell cycle control to nutrient availability and protect the organism from developing into an adult  
305 when resources were scarce.

306

307 In *C. elegans* larvae, CEP-1/p53 has been shown to be expressed in a subset of larval pharyngeal  
308 muscle and neuronal cells<sup>65,68</sup>. This has been visualized by others using the same functional,  
309 fluorescently tagged CEP-1, CEP-1::GFP which complements the *cep-1* deletion, *cep-1(lg12501)*,  
310 where endogenous CEP-1 protein is not expressed<sup>68</sup>. We found that in addition to these  
311 pharyngeal and neuronal cells, in L1 larvae overexpressing CEP-1/p53 and were fated to arrest  
312 as dauers, CEP-1/p53 also accumulated in epidermal progenitor blast cells (P cells) (Fig 3a). In  
313 *cep-1(lg12501)* L1 larvae, where *cep-1* is not overexpressed (Supplementary Fig. S6d) and  
314 larvae do not arrest as dauers but continue development into reproductive adults (Supplementary  
315 Fig. S7b), CEP-1 was also visible in P cells but at significantly lower levels (Fig 3a). These  
316 observations suggested that prior to dauer entry, in CEP-1/p53 overexpressing larvae, CEP-1/p53  
317 was active in these progenitor blast cells that would arrest in their multipotent state upon dauer  
318 entry.

319

320 *C. elegans* regulates postembryonic cell divisions using over 100 different overlapping and  
321 redundant genes<sup>80,85</sup>. Amongst these are the two p21 homologs, *cki-1* and *cki-2*<sup>86,87</sup>, and *phg-1*,  
322 the *C. elegans* homologue of Gas1 (Growth arrest-specific 1)<sup>86,88-90</sup>, a protein that controls cell  
323 cycle arrest and quiescence in mammalian cells in response to nutrition (serum) deprivation and  
324 harbors p53 consensus binding sites in *C. elegans*. In larvae overexpressing CEP-1/p53 and in  
325 larvae lacking *ilc-17.1*, both *cki-1* and *phg-1* were upregulated (Fig. 3b). In addition, *ilc-17.1*  
326 deletion mutants displayed increased CEP-1/p53 occupancy at the CEP-1/p53 consensus sites  
327 in the *phg-1* gene, although not at the *cki-1* gene, and the increased occupancy was restored to  
328 wild-type levels upon ILC-17.1 rescue (Fig 3c; Supplementary Fig. S7c). Thus, CEP-1/p53 activity

329 directly or indirectly upregulated at least two of the several cell cycle inhibitors known to pause  
330 cell cycle progression and promote quiescence.

331

332 We asked whether the upregulation of these cell cycle inhibitors was in itself sufficient to trigger  
333 dauer arrest. To answer this, we used RNAi to downregulate *cki-1* and *phg-1* and assessed  
334 whether this rescued the dauer arrest of *ilc-17.1* deleted larvae and CEP-1/p53 overexpressing  
335 larvae and promoted their continuous development. This was partly the case, and downregulating  
336 *phg-1* rescued a significant, although small, fraction of *ilc-17.1* deleted and *cep-1* overexpressing  
337 larvae from dauer diapause:  $6.7 \pm 2.2\%$ , *ilc-17.1* deletion larvae and  $10.1 \pm 2.2\%$  *cep-1*  
338 overexpressing larvae grew into reproductive adults instead of arresting as dauers on *phg-1* RNAi,  
339 compared to 0% and  $0.7 \pm 0.3\%$  on control RNAi (Fig 3d). RNAi-mediated knockdown of *cki-1*  
340 also caused a variable and small fraction of larvae to bypass dauer arrest (Fig 3d). Moreover,  
341 larvae that remained phenotypically arrested as dauers even after RNAi-induced knockdown of  
342 *phg-1* and *cki-1*, displayed non-dauer traits such as increased rates of sporadic pumping (Fig 3e).

343

344 One of the molecular signatures of quiescence is low metabolic activity, reflected in part by a  
345 decrease in the expression of mitochondrial enzymes including cytochrome C<sup>82,83</sup>. RNA-seq data  
346 showed that the mRNA expression of the majority of enzymes involved in glycolysis or oxidative  
347 phosphorylation (OXPHOS)<sup>91</sup> were not altered in *ilc-17.1* deletion mutants prior to their entry into  
348 dauer (Supplementary Figure S8 a-f; Supplementary Table 6). However, the mRNA levels of  
349 phosphofructokinase-1.2 (*pfk-1.2*), the key rate limiting enzyme in glycolysis, and  
350 cytochrome *c* (*cyc-2.2*), the subunit of complex IV of the electron transport chain responsible for  
351 the final transfer of reducing equivalents to O<sub>2</sub>, were dramatically decreased in *ilc-17.1* larvae,  
352 and in larvae that overexpressed CEP-1/p53 (Supplementary Figure S8 a, d, e). These changes  
353 were confirmed by qRT-PCR (Supplementary Figure S8g and Fig 3f). In mammalian cells, p53  
354 activity indirectly decreases the expression of enzymes required for glycolysis and indeed, the

355 decrease in mRNA expression of *pfk-1.2* was a downstream consequence of CEP-1/p53  
356 activation in the *ilc-17.1* deleted larvae: the deletion of *cep-1* rescued the low mRNA levels  
357 (Supplementary Figure S8g). Surprisingly, the decrease in *cyc-2.2* expression was also  
358 dependent on CEP-1/p53, but also on DAF-16/FOXO, as the deletion of *cep-1* or *daf-16* rescued  
359 the low *cyc-2.2* mRNA levels in *ilc-17.1* deleted larvae (Fig 3f). Moreover, although the  
360 downregulation of *pfk-1.2* or *cyc-2.2* alone was not sufficient to induce dauer in wild-type animals,  
361 RNAi induced downregulation of *cyc-2.2* in *ilc-17.1* deleted larvae increased the percentage of  
362 larvae that arrested as dauers under optimal conditions at temperatures of 20°C, suggesting that  
363 CEP-1/p53-dependent decrease of *cyc-2.2* was promoting dauer arrest (Supplementary Figure  
364 S8h).

365  
366 Taken together, these data indicate that the lack of ILC-17 activates CEP-1/p53, which  
367 accumulates in larval blast cells, and in addition, directly or indirectly activates a quiescence  
368 program, by upregulating the cyclin-dependent kinase inhibitors *cki-1* and the Gas1 ortholog, *phg-*  
369 *1*, and the downregulating key metabolic enzymes including Cytochrome C, *cyc-2.2*. These  
370 pathways likely collaborate to decrease glucose utilization and trigger the dauer diapause state  
371 of larvae, although surprisingly, CEP-1/p53-mediated increase in *cki-1* or *phg-1* was sufficient by  
372 itself to promote the dauer decision at a low frequency, and downregulation of Cytochrome C *cyc-*  
373 *2.2*, alone in an *ilc-17.1* background was sufficient to increase the fraction of larvae that transiently  
374 entered dauer.

375  
376 **ILC-17.1 suppresses CEP-1/p53 in *C. elegans* and human epithelial cells.**

377 Since our data pointed towards a model whereby ILC-17.1 signaling that occurred constitutively,  
378 under favorable conditions in the presence of food, suppressed CEP-1/p53 to promote continuous  
379 development, we directly examined whether IL-17-dependent suppression of CEP-1/p53 activity  
380 was a conserved mechanism in mammalian cell culture and in *C. elegans*. Indeed, stimulation of



381 human epithelial cells with human recombinant IL-17A induced a modest but significant  
382 downregulation of p53 expression levels (Fig. 4a). This was similar to the decrease in CEP-1/p53  
383 levels seen in *C. elegans* upon overexpression and paracrine activity of ILC-17.1 (Fig. 2h). For  
384 the experiments in mammalian cells, IL-17A stimulation of epithelial cells was confirmed at 18hrs  
385 by measurement of secreted CXCL5, a key cytokine downstream of IL-17A signaling<sup>92</sup>  
386 (Supplementary Fig. S9a).

387

388 In *C. elegans* also increased ILC-17.1 signaling suppressed CEP-1/p53 activation: just as ILC-  
389 17.1 overexpression rescued the dauer phenotype of *ilc-17.1* deletion mutants, overexpressing  
390 ILC-17.1 also inhibited the dauer arrest of *cep-1* overexpressing animals (Fig. 4b) and inhibited  
391 the increase in mRNA levels of CEP-1/p53 target genes, *egl-1* and *ced-13* in animals  
392 overexpressing CEP-1/p53 (Fig 2f; Supplementary Fig S7a). In addition, overexpressing ILC-17.1  
393 alone was sufficient to suppress the increased levels of *cki-1* and *phg-1* in *cep-1* overexpressing  
394 larvae (Fig. 3b) and restore the decreased *cyc-2.2* mRNA levels that occurred upon CEP-1/p53  
395 overexpression (Fig 3f). In *C. elegans* the activity of CEP-1/p53 has been best studied in adult  
396 animals where CEP-1/p53 controls germline apoptosis that occurs in response to genotoxic  
397 insults<sup>65,73,86</sup>. Therefore, to examine whether ILC-17.1 could also inhibit the canonical activity of  
398 CEP-1/p53, i.e., apoptosis in the adult germline, we subjected wild-type animals, CEP-1/p53  
399 overexpressing animals, and animals overexpressing both CEP-1/p53 and ILC-17.1, to gamma  
400 irradiation and measured the number of apoptotic corpses in the germlines of these animals (Fig  
401 4c). As could be expected, CEP-1/p53 overexpression caused an increase in physiological  
402 apoptosis that normally occurs during oogenesis in the germline, and in apoptosis that occurs in  
403 response to gamma irradiation (Fig 4c). Overexpressing ILC-17.1 in animals that also  
404 overexpressed CEP-1/p53, significantly decreased normal as well as irradiation-induced  
405 apoptosis (Fig 4c).

406

407 **Discussion.**

408 Here we show, for the first time, a role for CEP-1/p53 in *C. elegans* development. Our data support  
409 a model whereby the IL-17 cytokine ortholog, ILC-17.1, secreted by larval neurons in response to  
410 food, links food availability to the developmental decision to grow or enter the quiescent dauer  
411 stage by controlling the multifaceted transcriptional program of CEP-1/p53 (Fig. 4d). Specifically,  
412 our data show that the CEP-1/p53 needs to be repressed during larval stages to ensure the  
413 continuous growth of the animal into reproductive adults, and this repression is mediated by ILC-  
414 17.1 signaling through systemically expressed IL-17 receptors. In the absence of ILC-17.1, larvae  
415 automatically activate the dauer dormancy decision, and arrest as quiescent dauer larvae, either  
416 transiently, or for longer durations. The propensity for dauer arrest appears to be modulated by  
417 the extent of CEP-1/p53 activation, which is lower at 20°C compared to 25°C. Dauer arrest is also  
418 dependent on the repression of cytochrome C (*cyc-2.2*) levels which, in mammalian systems also  
419 maintains stem cell quiescence, directly or indirectly by CEP-1/p53 and DAF-16/FOXO. The site  
420 of CEP-1/p53 activity which results in a systemic alteration of the *C. elegans* developmental  
421 program needs to be identified; however intriguingly, prior to the dauer decision, in CEP-1/p53  
422 overexpressing animals, CEP-1 expression is upregulated in the P blast cells which remain  
423 multipotent until dauer exit.

424

425 Nutrient scarcity has shaped much of evolution, and the ability of cells and organisms to sense  
426 nutrients and prepare to immediately utilize these resources for growth and development or pause  
427 cell cycle progression and maintain a quiescent state until conditions are favorable again, has  
428 unquestionable selective advantages. For *C. elegans*, like for most organisms, the availability of  
429 food is not guaranteed, and therefore the organism uses different strategies to optimize  
430 reproductive success. *C. elegans* larvae develop into reproductive adults when food is plentiful,  
431 but enter a stress-resistant, quiescent dauer state adapted for persistence and dispersal when  
432 they sense that nutrients are insufficient<sup>25</sup>. Given the growing understanding of the roles of p53 in

433 regulation of stem cell differentiation and quiescence, it is tempting to speculate that, as seen in  
434 *C. elegans*, the p53-family of proteins evolved to link information regarding nutrient availability  
435 with the metabolic control of cell cycle progression. Indeed, in mammalian cells, glucose  
436 deprivation has been shown to activate p53<sup>93</sup>, and p53 is essential for maintaining stem cell  
437 quiescence in the hematopoietic system and other organs during steady state tissue  
438 homeostasis<sup>82,83</sup>.

439

440 It is also notable that ILC-17.1 is secreted by *C. elegans* sensory neurons to control CEP-1/p53  
441 activity. Neuronal control of other cell autonomous stress-responsive transcriptional programs  
442 such as the cellular response to protein misfolding has been described in *C. elegans* by our group  
443 and others, where the nervous system acts to coordinate the transcriptional and epigenetic  
444 responses of cells to environmental stress with organismal physiology and behavior<sup>94-97</sup>. In this  
445 regard, it is intriguing that the loss of ILC-17.1 signaling in *C. elegans*, which we show decreases  
446 Cytochrome C expression levels in a CEP-1/p53-dependent manner, has been shown in previous  
447 studies to control the animals' aversive response to oxygen<sup>14</sup>. Thus, it is likely that the metabolic  
448 changes triggered by CEP-1/p53 activation and organismal behavior feedback onto each other to  
449 influence organismal physiology. In mammals too, resident neurons and immune molecules in  
450 peripheral tissue profoundly influence cell fate decisions to remodel tissue architecture during  
451 development, organogenesis, inflammatory responses, and in diseases such as cancer<sup>98,99</sup>. It is  
452 therefore not far-fetched to imagine that similar neuronal control over p53 and cell quiescence  
453 exists in mammalian systems, albeit, perhaps modulated locally through peripheral innervation  
454 and immune cells. Such a control mechanism, if it exists, could open new avenues for therapeutic  
455 intervention in cancer and other diseases.

456

457 The repression of p53 by IL-17 cytokines appears to be conserved between *C. elegans* and  
458 human cells and pro-inflammatory cytokines such as the IL-17s are linked to the formation and

459 proliferation of solid tumors<sup>9,10,100</sup>. However, much needs to be understood before one can directly  
460 extrapolate the interaction between *C. elegans* ILC-17.1 and CEP-1/p53 to the mammalian  
461 context<sup>4,5,18,19,65</sup>. Importantly, in mammalian systems where cytokines suppress p53, this typically  
462 occurs through the activation of Nuclear factor- $\kappa$ B (NF- $\kappa$ B)<sup>101</sup>, and the *C. elegans* genome lacks  
463 NF- $\kappa$ B<sup>102</sup>. Nevertheless, as in mammals, *C. elegans* development requires the postembryonic  
464 division and differentiation of progenitor cell populations that can, under adverse conditions be  
465 maintained in a quiescent state. Thus, dissecting the role of p53 in *C. elegans* development to  
466 understand how its likely function in blast cells can systemically change the developmental  
467 trajectory of the whole organism, could yield far-reaching insights.

468 **Acknowledgements**

469 We thank the V.P. laboratory, Drs. Sarit Smolikove, Josep Comeron and Anna Malkova for  
470 comments, Dr. Peter Ratcliffe, Oxford, for his generous gift of *CeHIF-1* antibody, and Dr. Mario  
471 Bono, Institute of Science and Technology Austria (ISTA) for *C. elegans* strains not used in this  
472 study. Nematode strains were provided by the Caenorhabditis Genetics Center (CGC) (funded  
473 by the NIH Infrastructure Programs P40 OD010440). This work was supported by NIH R01  
474 AG060616 (V.P.).

475 **Author Contributions**

476 All authors designed the study, performed experiments, analyzed data, and drafted the  
477 manuscript. P.D.I coordinated the mammalian experiments, V.P. coordinated the project. All  
478 authors approved the final version of the manuscript.

479

480 **Declaration of Interests**

481 The authors declare no competing interests

482

483 **Data Availability**

484 The following data sets were generated

485 Genes differentially expressed in the following *C. elegans* larvae bleach-hatched and allowed to  
486 grow for 30-34 hrs. at 25°C: wild type (N2), *ilc-17.1*(syb5296) X and praEx022 (*unc-54p::ilc-17.1*  
487 cDNA::3XFLAG::tbb-2 3'UTR; *pdat-1::GFP::unc-54* 3'UTR).

488

489 The data discussed in this publication have been deposited in NCBI's Gene Expression  
490 Omnibus (Edgar et al., 2002) and are accessible through GEO Series accession number  
491 GSE218596, <https://www.ncbi.nlm.nih.gov/geo/query/acc.cgi?acc=GSE218596>

Figure 1

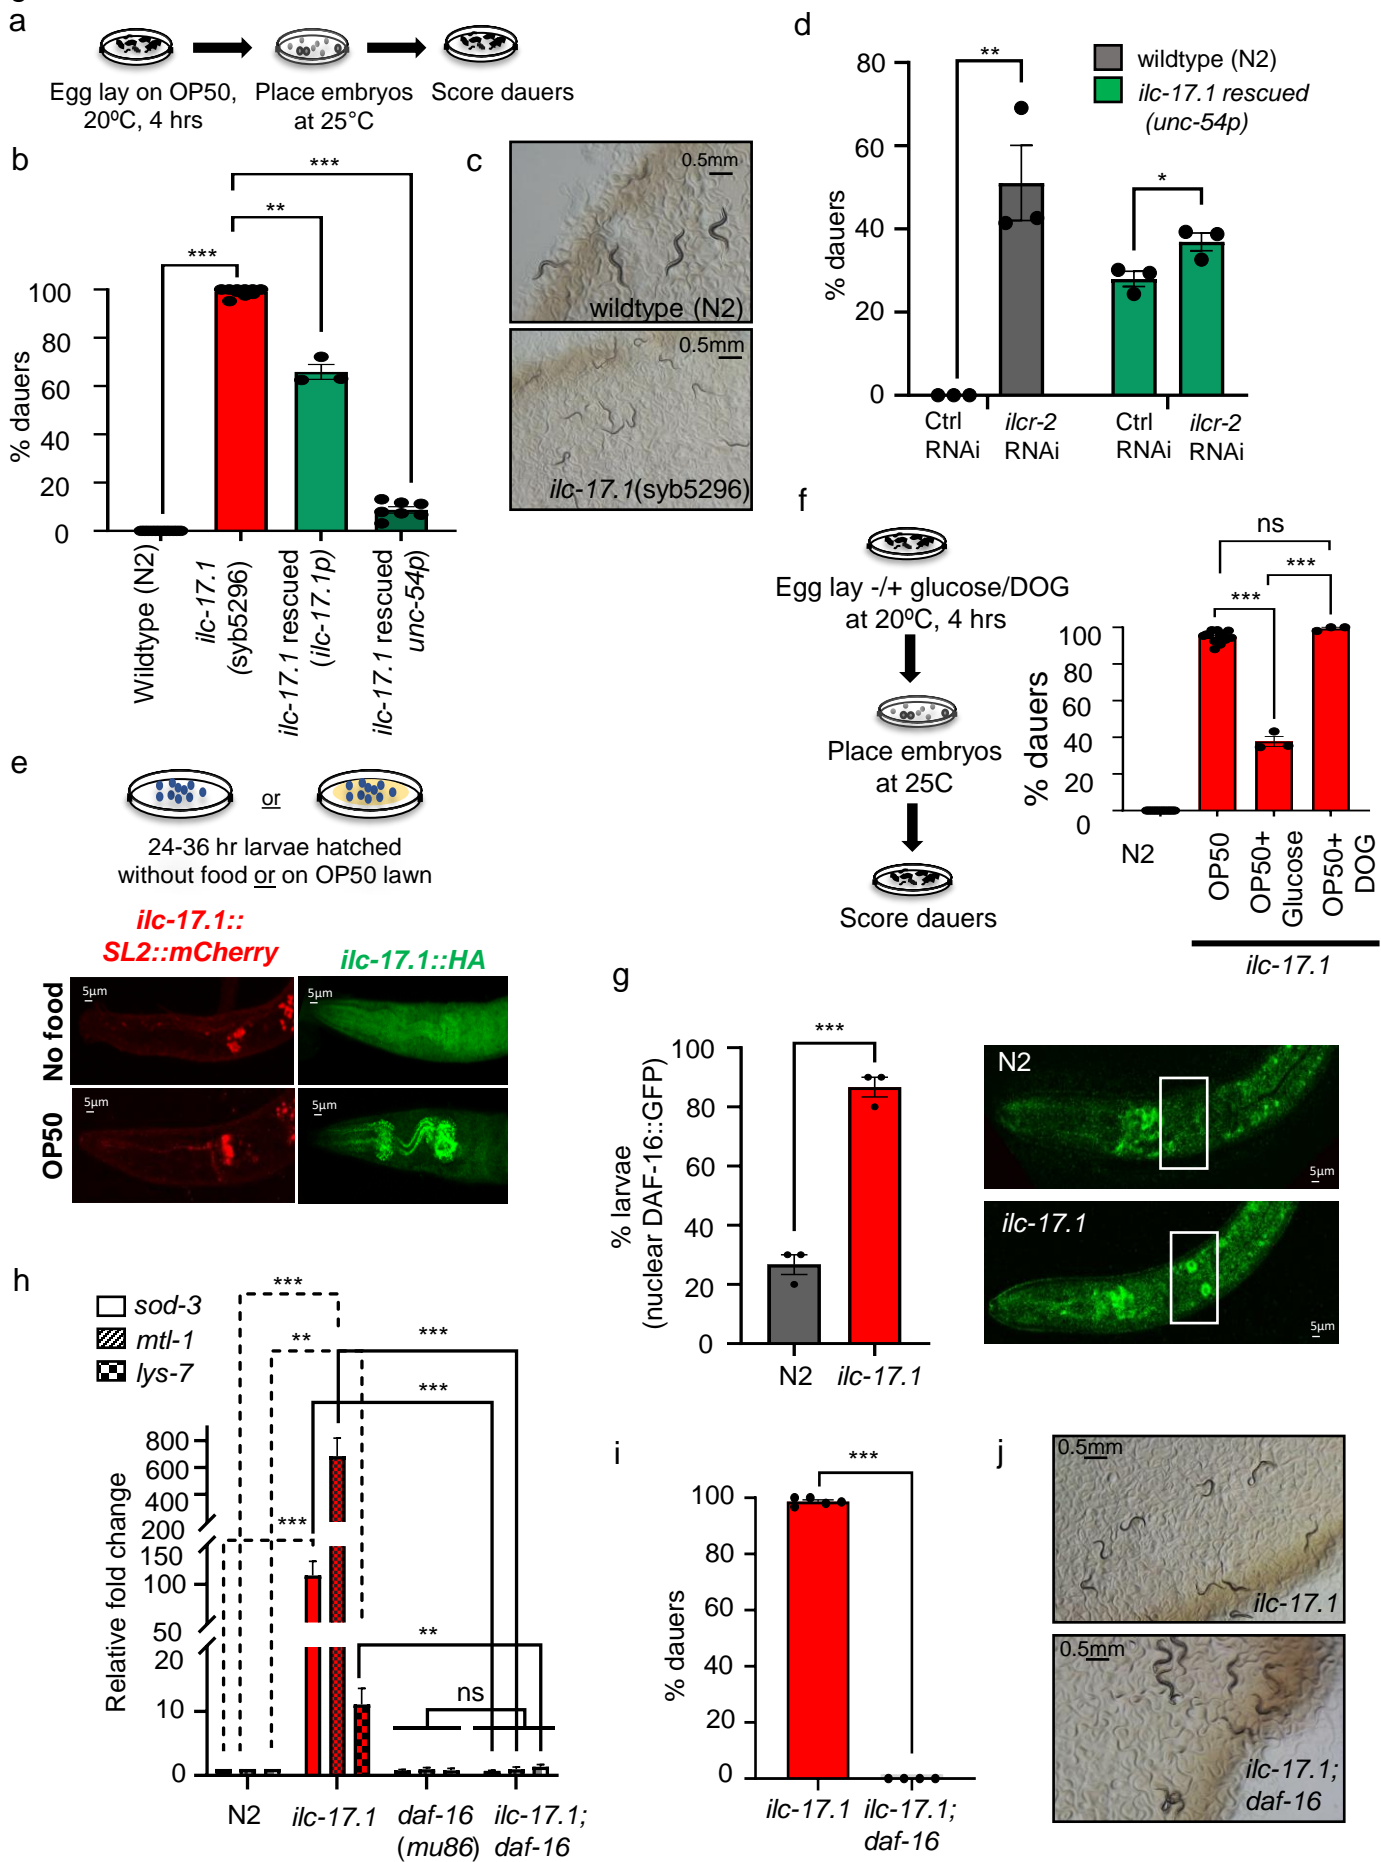

492 **Figure 1: ILC-17.1 secreted by larval neurons in response to food availability is required to**  
493 **prevent dauer arrest.**

494 **a.** Schematic of experiment to assess dauer arrest. Note: embryos were laid for 4 hours by day-  
495 one gravid adults under optimal growth conditions: on OP50 lawns, and at 20°C. Adults were  
496 subsequently removed and embryos were moved to 25°C. Unless otherwise mentioned, in  
497 these and subsequent experiments, all dauer assays were conducted at 25°C, and dauers  
498 were scored 48-72 hours after egg lay.

499

500 **b.** Percentage of larvae that arrest as dauers.  $n=3-7$  experiments. \*\*\* $p < 0.001$ , \*\* $p < 0.01$ .  
501 (analysis of variance (ANOVA) with Tukey's correction).

502

503 **c.** Representative micrographs. **Top:** Wildtype (N2) grew to L4s. **Bottom:** *ilc-17.1(syb5296)* X  
504 larvae arrested as dauers. Scale bar, 0.5mm

505

506 **d.** Percentage of wildtype (N2) and *ilc-17.1(syb5296)* X larvae that arrest as dauers on control  
507 (L4440; Ctrl) and *ilcr-2* RNAi. \*\* $p < 0.01$ , \* $p < 0.05$  (analysis of variance (ANOVA) with Tukey's  
508 correction).  $n=3$  experiments.

509

510 **e. Top:** Schematic of experiment to assess localization of *ilc-17.1* mRNA and ILC-17.1 protein in  
511 the presence (OP50) and absence of food. Embryos hatched at 20°C and imaged after 24-36  
512 hours (L1 stage larvae). **Bottom:** Representative micrographs showing projections of confocal  
513 z-sections of pharyngeal region of 24-36 hr. larvae. **left:** mCherry co-expressed with *ilc-17.1*  
514 mRNA is in amphid neurons. **right:** projection of z-sections showing immunostaining with anti-  
515 HA antibody to visualize CRISPR tagged endogenous ILC-17.1::HA in larvae. Scale bar, 5 $\mu$ m.

516



517 **f. Left:** Schematic of experimental design. **Right:** Percent dauers: wildtype (N2) and *ilc-*  
518 *17.1(syb5296)* X larvae on OP50 alone, and on OP50 + 50mM glucose or 50mM DOG. *n*=3-  
519 13 experiments. \*\*\**p* < 0.001, (analysis of variance (ANOVA) with Tukey's correction).

520

521 **g. Left:** Percent larvae where DAF-16::GFP was localized in the intestinal nucleus. Larvae were  
522 grown at 20°C larvae for 36 hr. *n*=3 experiments. \*\*\**p* < 0.001. (unpaired t-test). Note:  
523 experiments were conducted at 20°C, since at 25°C, DAF-16::GFP was constitutively in the  
524 intestinal nuclei even in wildtype larvae. **Right:** representative micrographs showing DAF-  
525 16::GFP localization in wildtype and *ilc-17.1(syb5296)* X larvae. Scale bar, 5µm

526

527 **h.** Average *sod-3*, *mtl-1*, and *lys-7* mRNA levels in 30-36 hr. old larvae grown at 25°C. mRNA  
528 levels were determined relative to *pmp-3* and normalized to that in wildtype (N2). *n*=4-10  
529 experiments. \*\*\**p* < 0.001, \*\**p* < 0.01, ns=not significant, (unpaired t-test).

530

531 **i.** Percent dauers upon deleting *daf-16* in *ilc-17.1* mutants. *n*=3-5 experiments. \*\*\**p* < 0.001,  
532 (unpaired t-test).

533

534 **j.** Representative micrographs. *ilc-17.1(syb5296)* X larvae arrested as dauers but *ilc-17.1*  
535 deleted larvae grew into L4s and reproductive adults in a *daf-16* deficient background, i.e. *daf-*  
536 *16(mu86)*. Scale bar:0.5mm

537

538 Data in all graphs show mean ± s.e.m.

Figure 2

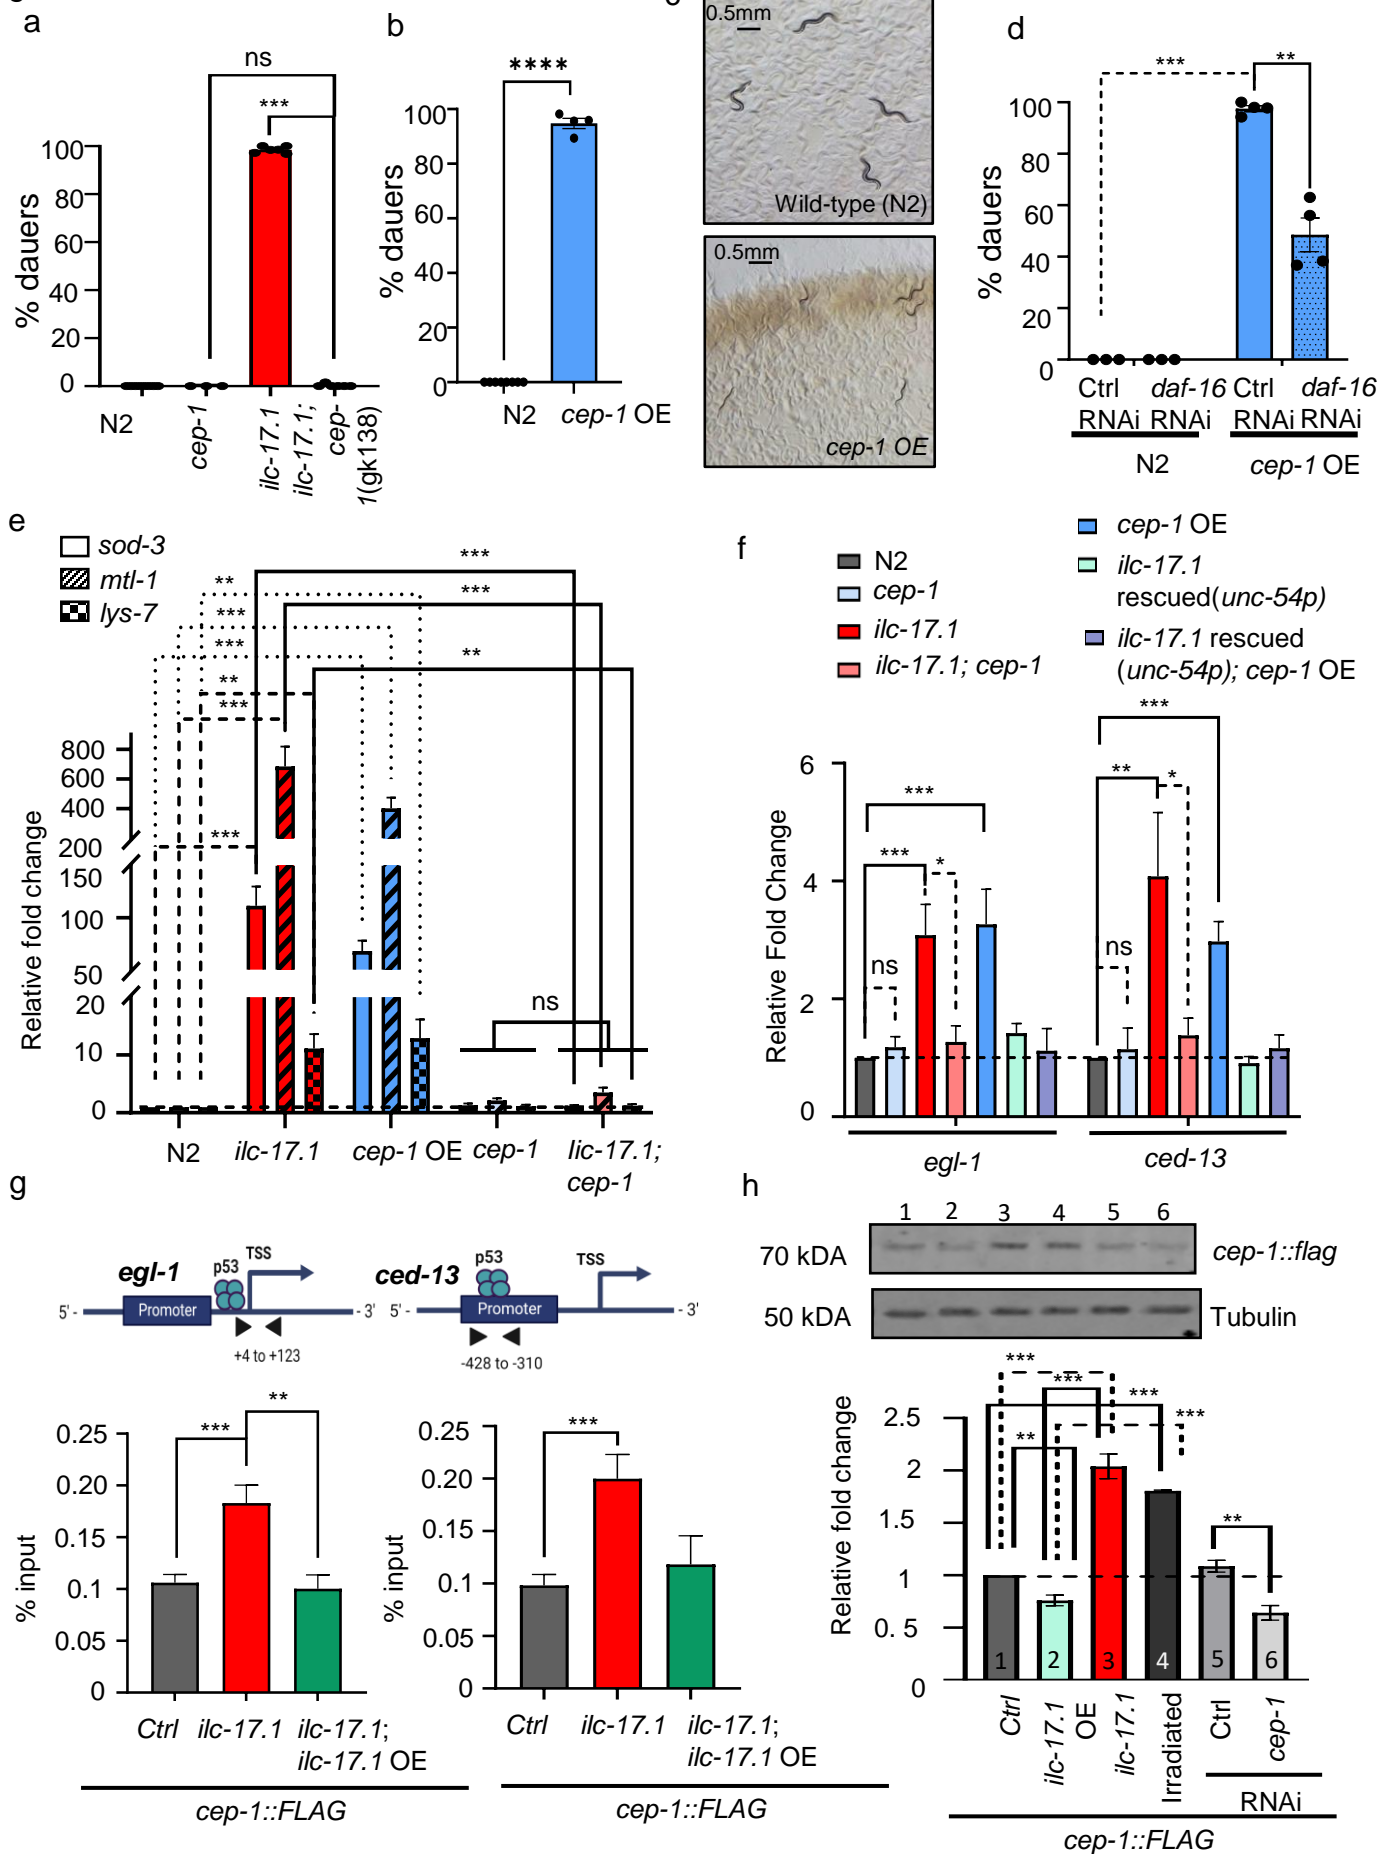

539 **Figure 2: IL-17 modulates CEP-1/p53 activity to control dauer arrest.**

540 **a.** Percent dauers.  $n=3-8$  experiments.  $***p < 0.001$ , ns, not significant, (analysis of variance  
541 (ANOVA) with Tukey's correction).

542

543 **b.** Percent dauers.  $n=4$  experiments.  $***p < 0.001$ , (analysis of variance (ANOVA) with  
544 Tukey's correction).

545

546 **c.** Representative micrographs. **Top:** Wildtype (N2) grew to L4s. **Bottom:** *cep-1*  
547 overexpressing larvae arrested as dauers. Scale bar:0.5mm.

548

549 **d.** Percent wildtype (N2) and *cep-1* overexpressing larvae that arrest as dauers on control  
550 and *daf-16* RNAi.  $n=4$  experiments.  $***p < 0.001$ ,  $**p < 0.01$  (analysis of variance (ANOVA)  
551 with Tukey's correction).

552

553 **e.** Average *sod-3*, *mtl-1*, and *lys-7* mRNA levels in 30-36 hr. old larvae grown at 25°C. mRNA  
554 levels were determined relative to *pmp-3* and normalized to that in wildtype (N2).  $n=6-10$   
555 experiments.  $***p < 0.001$ ,  $**p < 0.01$ . (unpaired t-test).

556

557 **f.** Average *egl-1* and *ced-13* mRNA levels in 30-36 hr. larvae grown at 25°C. mRNA levels  
558 were determined relative to *pmp-3* and normalized to that in wildtype (N2).  $n=6-7$   
559 experiments.  $***p < 0.001$ ,  $**p < 0.01$ ,  $*p < 0.05$ , ns=not significant, (unpaired t-test).

560

561 **g.** CEP-1 occupancy (expressed as percent input) in 30-36 hr. larvae grown at 25°C,  
562 measured at the promoter proximal regions of *egl-1* and *ced-13* (Top schematic). CEP-1  
563 occupancy was assayed in animals where endogenous *cep-1* was FLAG tagged at its C-  
564 terminus using CRISPR/Cas9, and immunoprecipitated with anti-FLAG antibody. Stains

565 used: CEP-1::FLAG expressing animals in control wild-type background (Ctrl), in *ilc-*  
566 *17.1*(syb5296) X background, and in *ilc-17.1*(syb5296)X rescued from dauer arrest by  
567 overexpressing ILC-17.1 under the *unc-54* promoter (*ilc-17.1*; *ilc-17.1* OE). *n*=4  
568 experiments. \*\*\**p* < 0.001, \*\**p* < 0.01. (unpaired t-test).

569

570 **h. Top:** Representative Western blot showing CEP-1: FLAG and tubulin when crossed into  
571 *ilc-17.1* overexpressing and deletion backgrounds. *cep-1* RNAi serves to show specificity.  
572 **Bottom:** CEP-1 levels were quantified relative to tubulin and normalized to control animals  
573 (CEP-1::FLAG in wildtype background). *n*=4 experiments. Numbers in data bars  
574 correspond to representative bands on western. \*\*\**p* < 0.001, \*\**p* < 0.01 (unpaired t-test).

575

576 Data in all graphs show mean ± s.e.m.

Figure 3

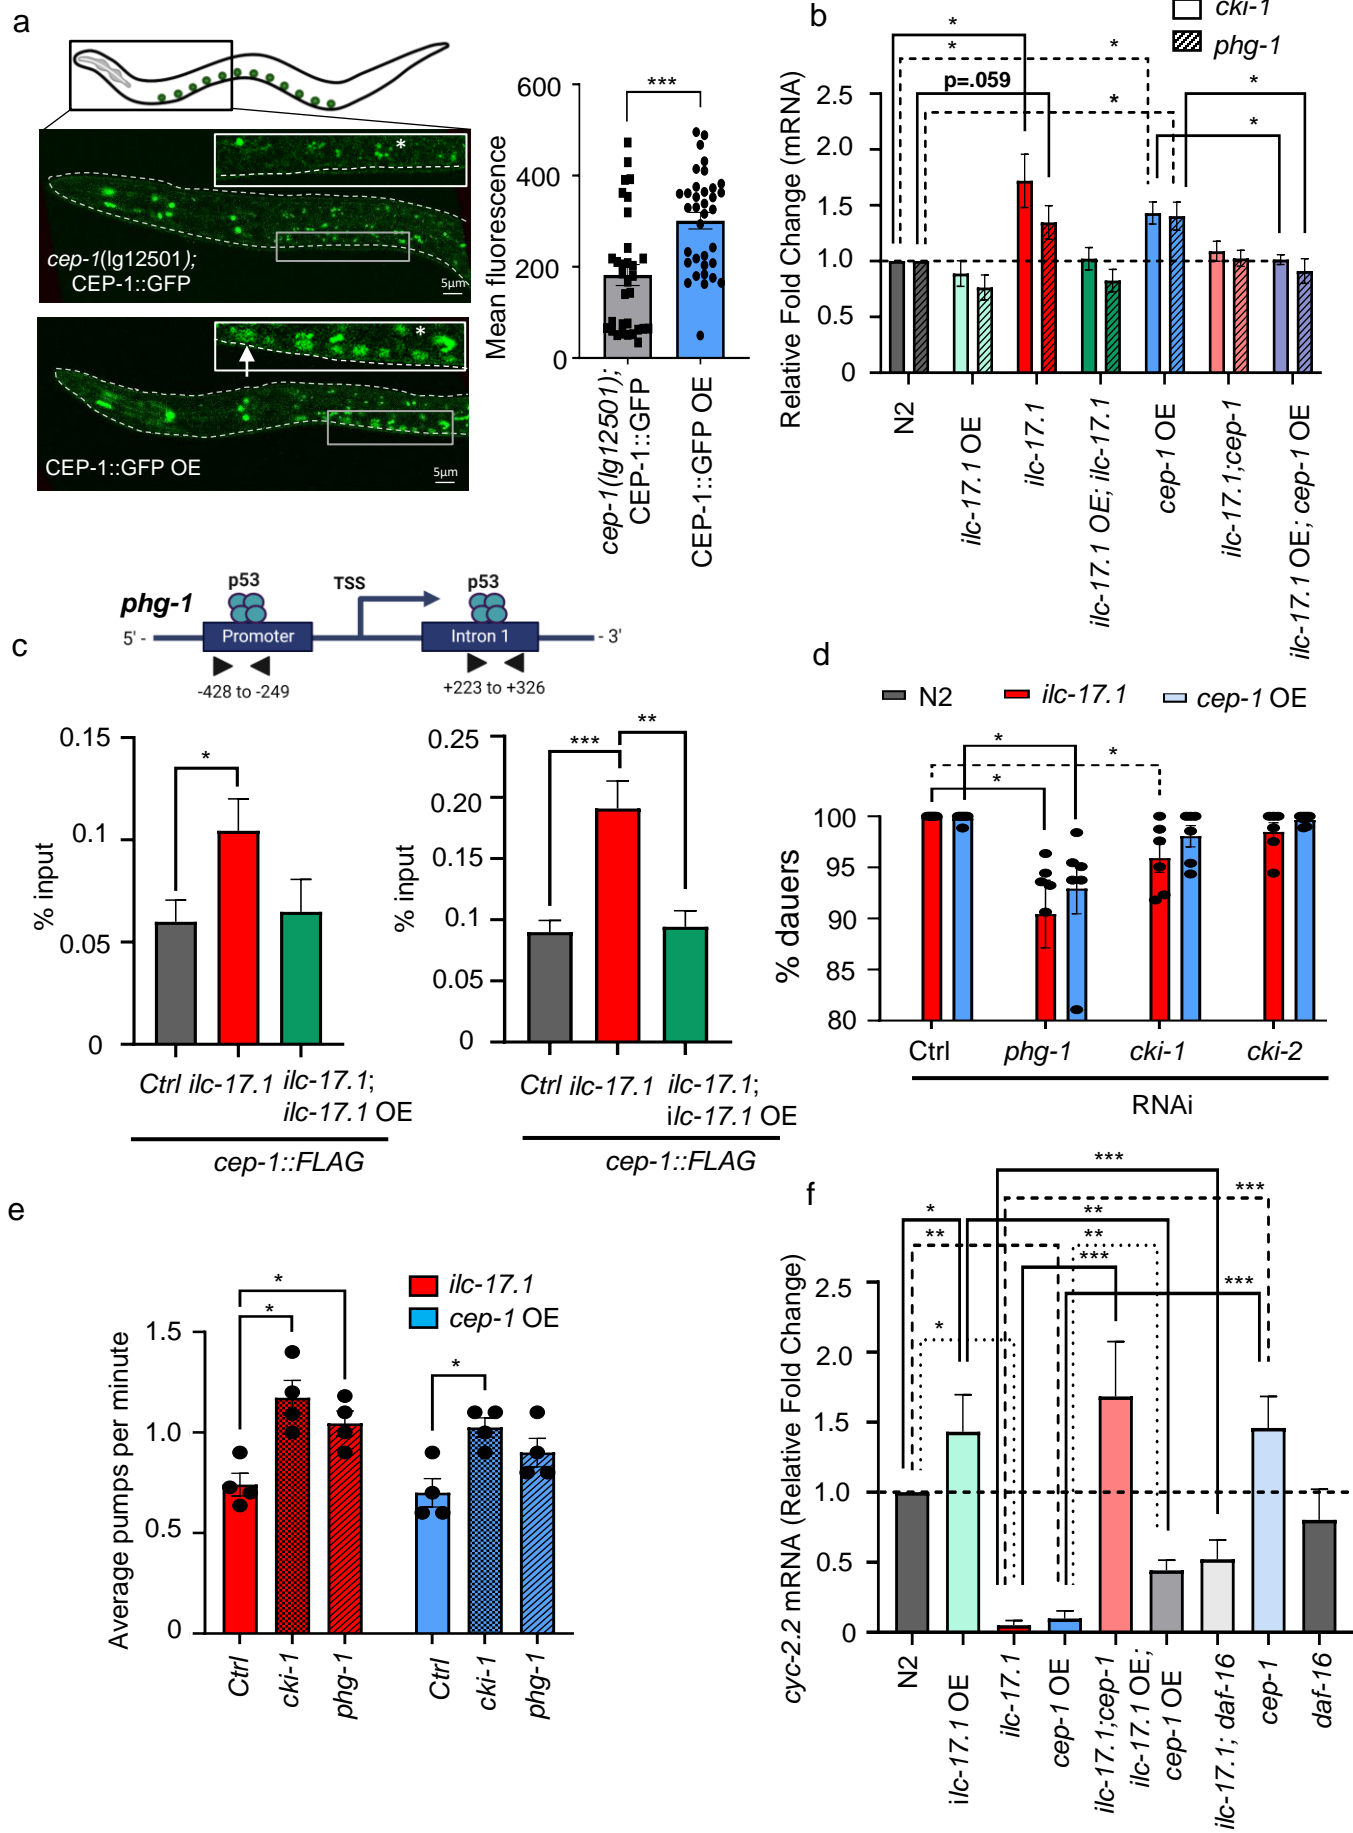

577 **Figure 3: Active CEP-1/p53 is expressed in multipotent progenitor cells (P cells) prior to**  
578 **dauer arrest and upregulates cell cycle inhibitors and downregulates metabolic enzymes.**  
579 **a. Left:** Representative micrographs of anterior region of 15-20 hr. L1 larvae at 25°C, showing  
580 CEP-1::GFP expression in the ventral surface postembryonic blast cells (P blast cells; arrow).  
581 Gut granule background fluorescence indicated with asterix. A schematic is shown above.  
582 Insets: zoom-in on the P blast cells. **Right:** CEP-1::GFP expression in P cells of CEP-1  
583 overexpressing larvae and in larvae harboring a deletion (*lg12501*) in the endogenous *cep-1*  
584 gene.  $n=3$  experiments.  $***p < 0.001$ , (unpaired t-test). For *cep-1* mRNA expression levels see  
585 **Supplementary Fig. S6d.**  
586  
587 **b.** Average *cki-1* and *phg-1* mRNA levels in 30-36 hr. larvae grown at 25°C. mRNA levels were  
588 determined relative to *pmp-3* and normalized to that in wildtype (N2).  $n=4-6$  experiments.  
589  $*p < 0.05$ . (unpaired t-test).  
590  
591 **c.** CEP-1 occupancy (expressed as percent input) in 30-36 hr. larvae grown at 25°C, measured  
592 at the promoter proximal region, and in the first intron of *phg-1* (Schematic on top). CEP-1  
593 occupancy was assayed in animals where endogenous *cep-1* was FLAG tagged at its C-  
594 terminus using CRISPR/Cas9, and immunoprecipitated with anti-FLAG antibody. Stains used:  
595 CEP-1::FLAG expressing animals in control wild-type background (Ctrl), in *ilc-17.1(syb5296)*  
596 X background, and in *ilc-17.1(syb5296)*X rescued from dauer arrest by overexpressing ILC-  
597 17.1 under the *unc-54* promoter (*ilc-17.1; ilc-17.1 OE*).  $n=4$  experiments.  $***p < 0.001$ ,  
598  $**p < 0.01$ ,  $*p < 0.05$ . (unpaired t-test).  
599  
600 **d.** Percent dauers in *ilc-17.1* larvae and *cep-1* overexpressing larvae upon RNAi induced  
601 downregulation of *cki-1* and *phg-1*.  $n=6$  experiments.  $*p < 0.05$ , (analysis of variance (ANOVA)  
602 with Tukey's correction).

603

604 e. Average pumps/minute in *ilc-17.1* and *cep-1* dauers when subjected to control (L4440; Ctrl),  
605 *cki-1* and *phg-1* RNAi.  $n=4$  experiments, and 10 dauers were scored per experiment.  $*p < 0.05$   
606 (unpaired t-test).

607

608 f. Average *cyc-2.2* mRNA levels in 30-36 hr. larvae grown at 25°C. mRNA levels were  
609 determined relative to *pmp-3* and normalized to that in wildtype (N2).  $n=4-6$  experiments.  
610  $***p < 0.001$ ,  $**p < 0.01$ ,  $*p < 0.05$ . (unpaired t-test).

611

612 Data in all graphs show mean  $\pm$  s.e.m.

Figure 4

a

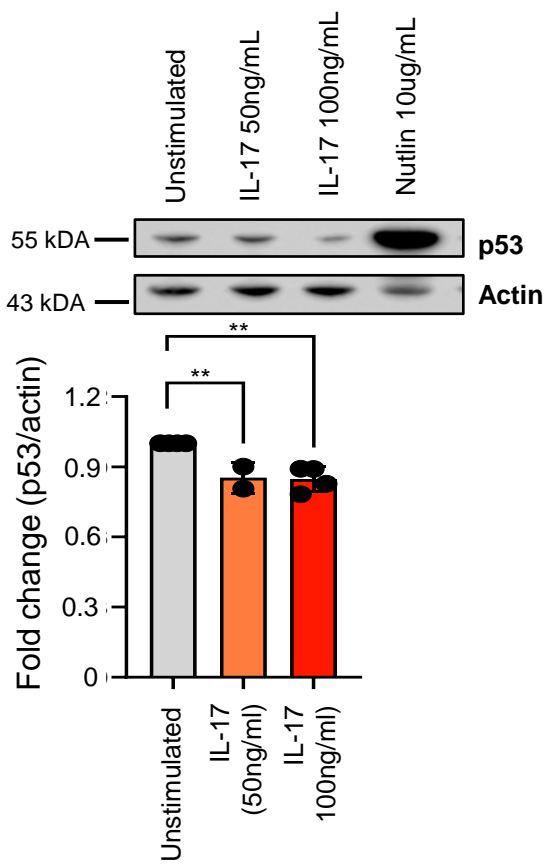

b

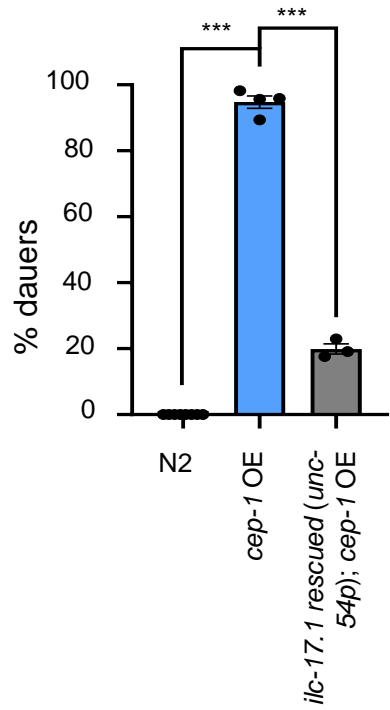

c

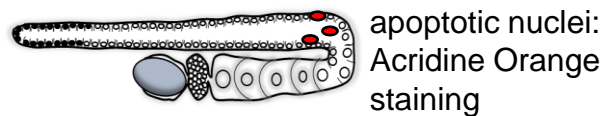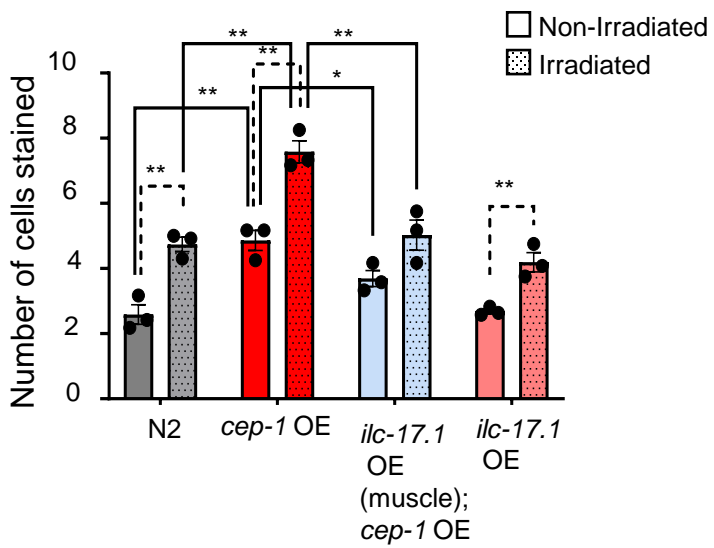

d

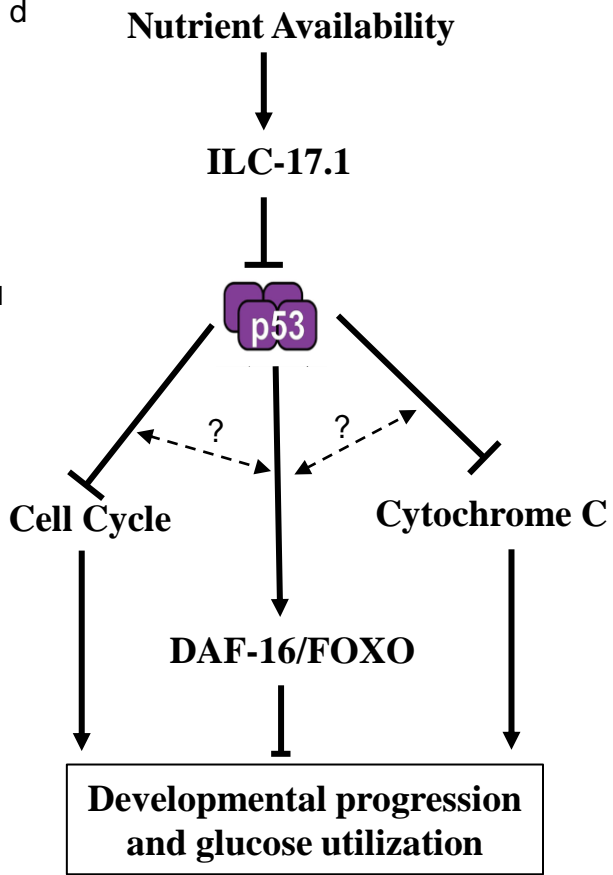



613 **Figure 4: ILC-17.1 suppresses CEP-1/p53 in *C. elegans* and mammalian epithelial cells.**

614 **a. Top:** Representative Western blot showing p53 levels in A459 epithelial cells stimulated  
615 for 18hrs with increasing doses of rIL-17.  $\beta$ -actin was used as a loading control and Nutlin  
616 was used as a positive control. **Bottom:** Quantification of p53 levels normalized to actin  
617 levels.  $n= 2-4$  independent experiments.  $**p<0.01$ , (One-Way ANOVA with uncorrected  
618 Fisher's LSD).

619  
620 **b.** Percent dauers upon overexpressing ILC-17.1 (ectopic expression under the muscle  
621 specific *unc-54* promoter) in *cep-1* overexpressing larvae at 25°C.  $n=4$  experiments.  
622  $***p < 0.001$ , (analysis of variance (ANOVA) with Tukey's correction).

623  
624 **c. Top:** Schematic of germline apoptosis (apoptotic cells in red) scored with Acridine Orange.  
625 **Bottom:** Average numbers of apoptotic cells in day-one adult animals under control, non-  
626 irradiated conditions, and upon irradiation with 75 Gy.  $n= 3$  experiments, and 12 gonad  
627 arms /experiment.  $**p < 0.01$ ,  $*p < 0.05$  (analysis of variance (ANOVA) with Tukey's  
628 correction).

629  
630 **d.** Working model showing how the IL-17 cytokine ortholog, ILC-17.1, secreted by larval  
631 neurons in response to nutrient availability, suppresses CEP-1/p53 and promotes the  
632 developmental decision to continue reproductive growth and glucose utilization; In the  
633 absence of ILC-17.1 or excess CEP-1/p53, larvae enter the quiescent dauer stage by  
634 activating the different programs of CEP-1/p53.

635

636 Data in all graphs show mean  $\pm$  s.e.m.

Figure S1

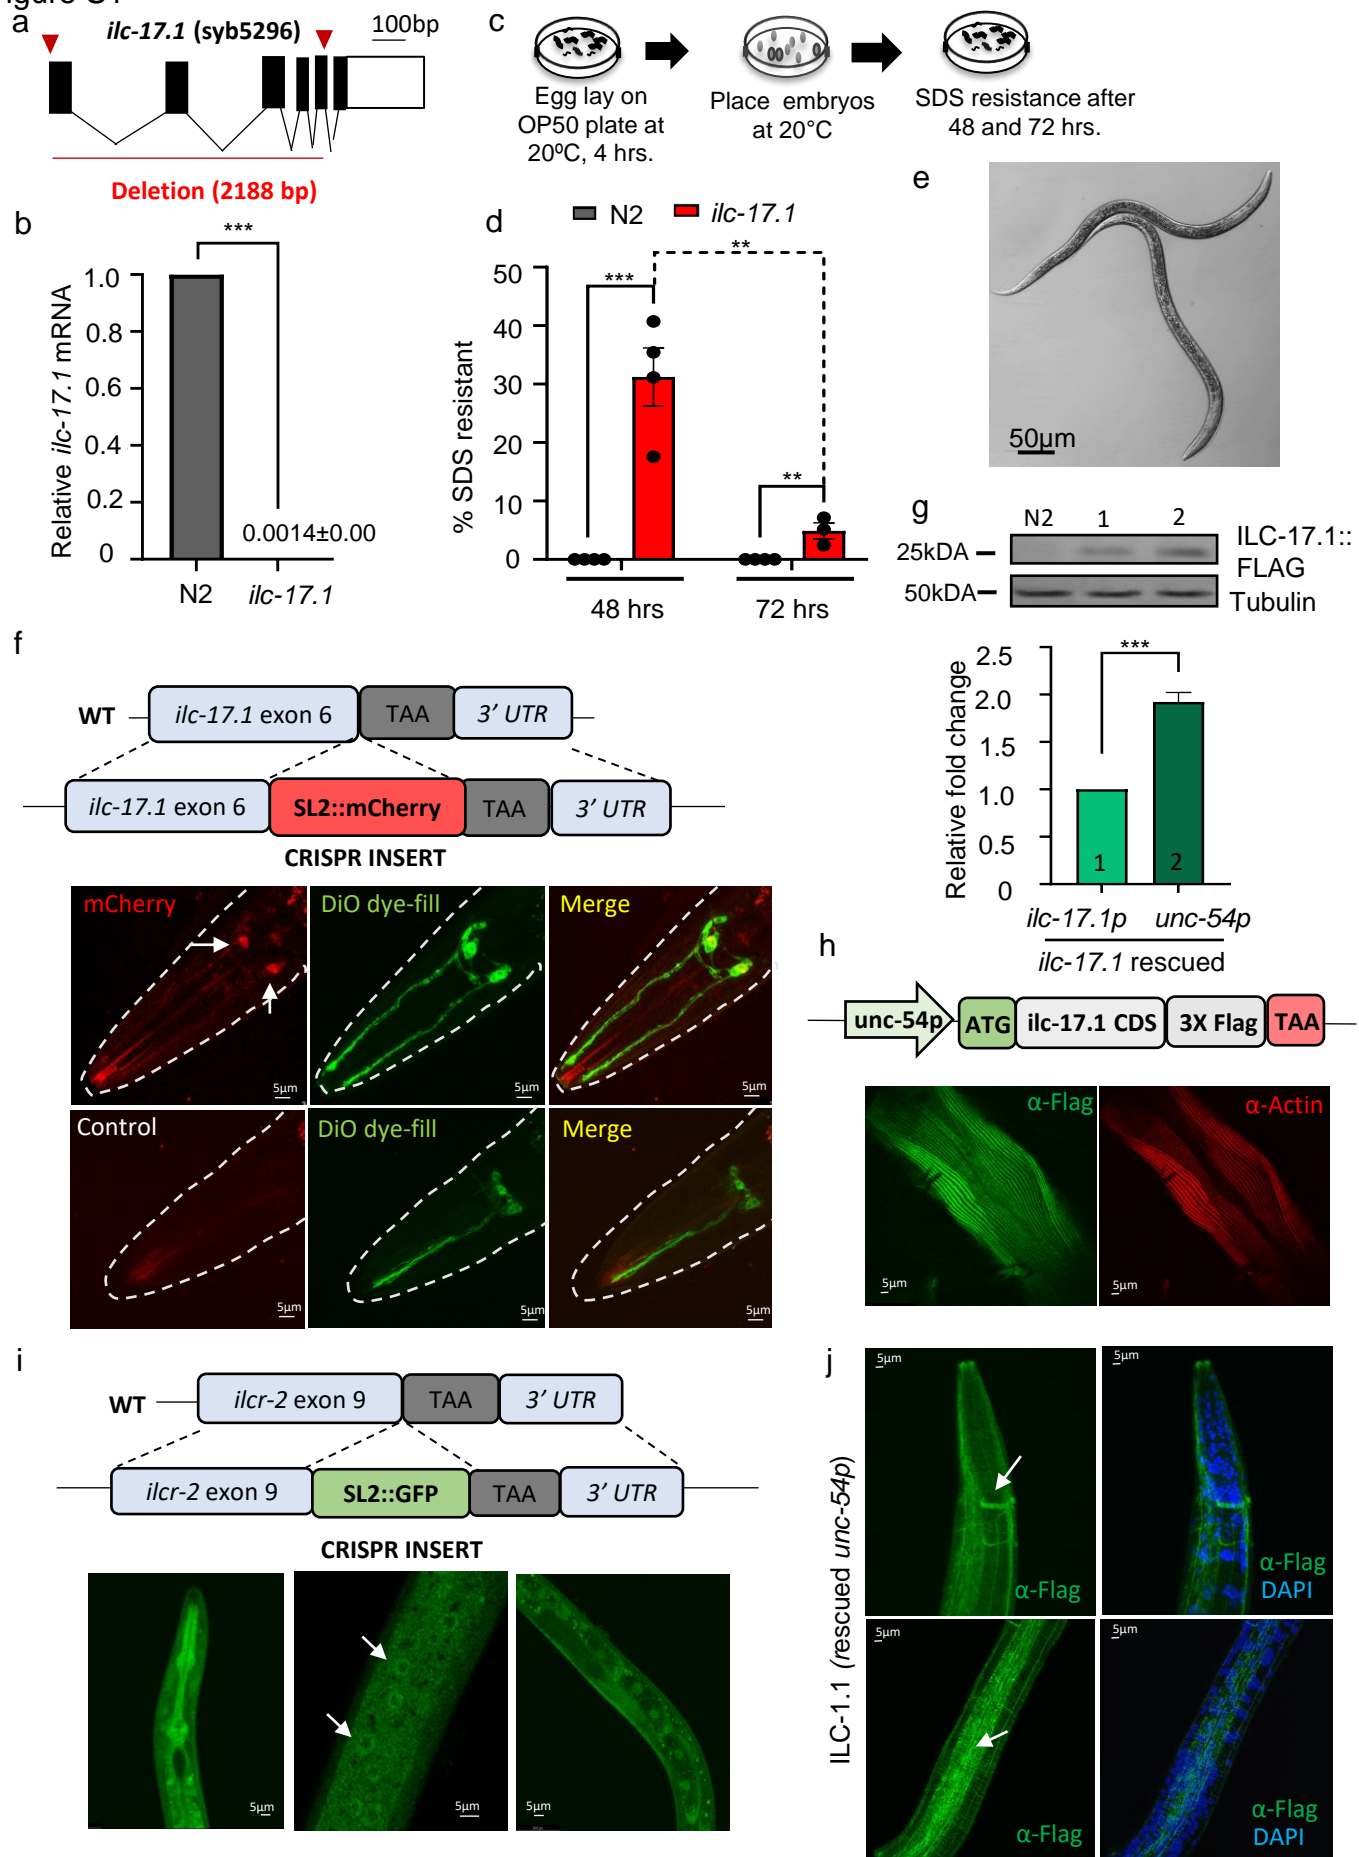

637 **Supplementary Figure S1: ILC-17.1 is expressed in amphid neurons and secreted to**  
638 **modulate *C. elegans* developmental diapause.**

639 a. Schematic of *ilc-17.1* gene depicting the syb5296 deletion.

640

641 b. Average mRNA expression in *ilc-17.1* (syb5296) X deletion mutants relative to wildtype  
642 (N2).  $n=4$  experiments.  $***p < 0.001$ , (unpaired t-test).

643

644 c. Schematic of experiment leveraging the dauer-resistance to 1% SDS, to determine the  
645 percentage of larvae that enter a dauer state during development under optimal conditions  
646 at 20°C.

647

648 d. Percent of wildtype (N2) and *ilc-17.1* (syb5296) X deletion mutant larvae that transiently  
649 enter dauer during development at 20°C.  $n=4$  experiments.  $***p < 0.001$ ,  $**p < 0.01$ ,  
650 (analysis of variance (ANOVA) with Tukey's correction).

651

652 e. Representative micrograph showing DIC image of *ilc-17.1* (syb5296) X deletion mutant  
653 dauer larvae, 72 hrs. post-hatching at 25°C. Scale bar=50µm.

654

655 f. **Top:** Schematic of CRISPR insertion of SL2: mCherry into *ilc-17.1* locus. **Bottom, upper**  
656 **panel:** Representative micrographs showing mCherry expression in amphid neurons of  
657 *C. elegans* expressing mCherry as a bicistronic SL2 cassette along with the endogenous  
658 *ilc-17.1* gene to report on sites of *ilc-17.1* mRNA expression. Amphid neurons were  
659 identified by DiO dye filling (GFP); mCherry overlapped with a subset of DiO filled neurons.  
660 **Bottom, lower panel:** Wildtype (N2; Control) not expressing mCherry imaged to show  
661 specificity of mCherry expression. Scale bar=5µm.

662

- 663 **g. Top:** Representative Western blot showing (upper panel) expression of ILC-17.1::FLAG  
664 rescue constructs under the *ilc-17.1* promoter (1) and under the *unc-54* promoter (2).  
665 Wildtype (N2) were used to show specificity of  $\alpha$ -FLAG antibody. (lower panel) tubulin.  
666 **Bottom:** ILC-17.1::FLAG expression, quantified relative to tubulin levels and normalized  
667 to FLAG levels in animals expressing ILC-17.1::FLAG rescue construct under the *ilc-17.1*  
668 promoter (1).  $n=3$  experiments. \*\*\* $p < 0.001$  (unpaired t-test).  
669
- 670 **h. Top:** Schematic of ILC-17. 1: FLAG rescue contrast driven by the *unc-54* promoter that  
671 was overexpressed in *ilc-17.1* (*syb5296*) X deletion mutants and rescued their dauer  
672 arrest. **Bottom:** Representative micrographs showing a z-section of ILC-17. 1: FLAG  
673 expressing animals immunostained with  $\alpha$ -FLAG antibody, and  $\alpha$ -actin (to show  
674 expression in body wall muscle cells). Scale bar=5 $\mu$ m  
675
- 676 **i. Top:** Schematic of CRISPR insertion of SL2: GFP into *ilcr-2* locus to identify sites of *ilcr-*  
677 2 expression. **Bottom:** Representative micrographs showing GFP expression in cells of  
678 the pharynx (left), epidermal cells (middle; arrows) and gonad (right). Scale bar=5 $\mu$ m  
679
- 680 **j.** Representative micrographs showing two z-sections through animals overexpressing ILC-  
681 17.1::FLAG in their body wall muscle cells as in h. Note: ILC-17.1::FLAG is detected at  
682 the amphid commissures near the pharynx (top pane; arrow) and in the epidermis (bottom  
683 panel; arrows) in addition to the body wall muscle cells (h), Scale bar=5 $\mu$ m  
684
- 685 Data in all graphs show mean  $\pm$  s.e.m.

Figure S2

a

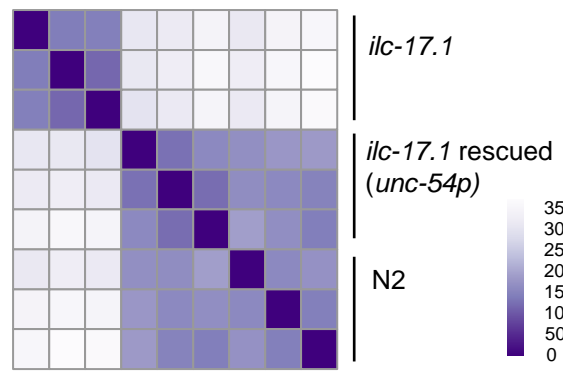

b

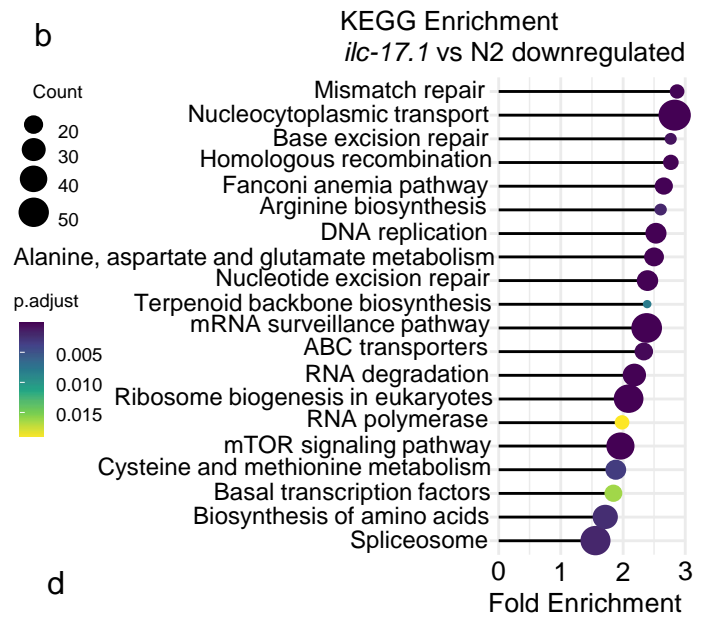

c

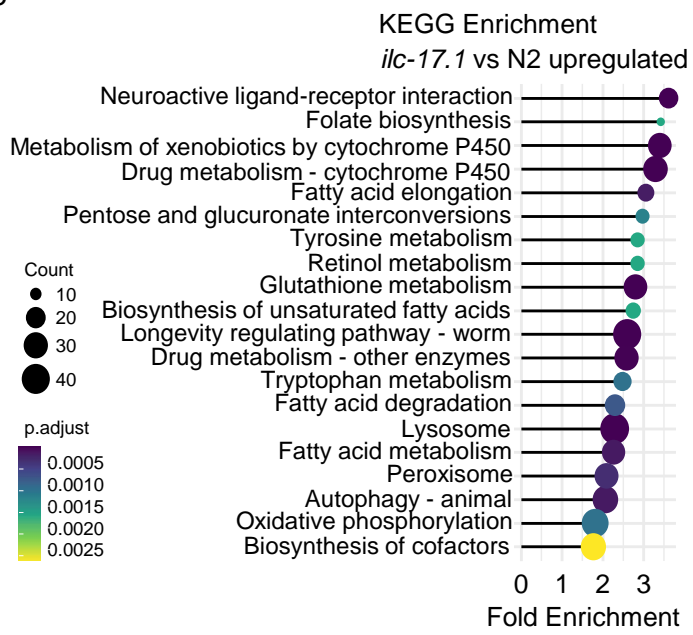

d

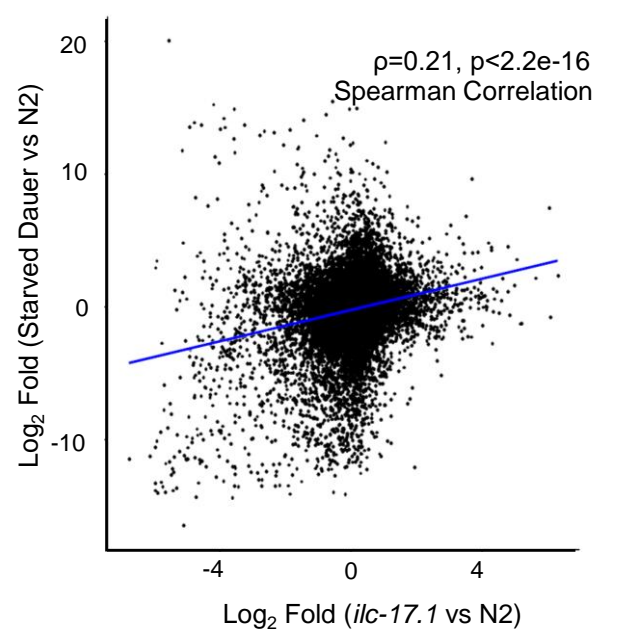

e

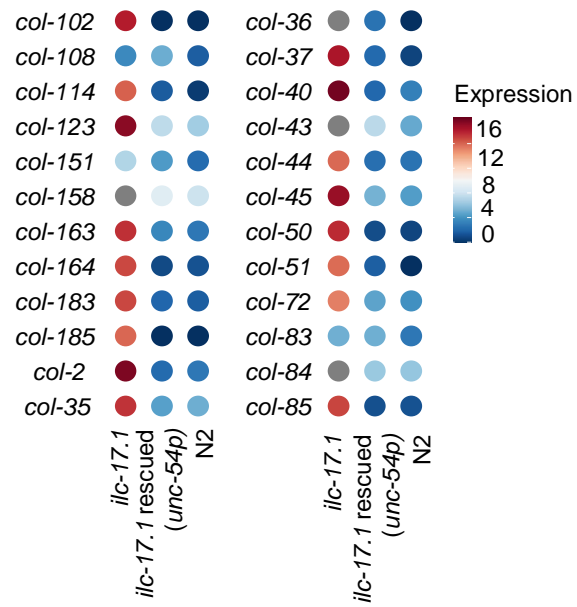

686 **Supplementary Figure S2: RNA-seq analysis of ILC-17.1 deficient larvae.**

- 687 **a.** Pair-wise distance matrix of RNA-seq samples shows the expected clustering of total RNA  
688 of the biological triplicates of each strain. RNA-seq analysis was conducted on total RNA  
689 purified from wildtype (N2), *ilc-17.1* deletion larvae, and *ilc-17.1* deleted larvae  
690 overexpressing ILC-17.1 in the body wall muscle cells [*ilc-17.1rescued (unc-54p)*]. All  
691 larvae were grown for 34-36 hrs. at 25°C; wild-type and rescue strains were in late L2, L3  
692 and *ilc-17.1* larvae had not yet arrested as dauers.
- 693
- 694 **b.** KEGG enrichments (padust <0.015) associated with significantly (padjust <0.05)  
695 differentially downregulated genes.
- 696
- 697 **c.** KEGG enrichments (padust <0.0025) associated with significantly (padjust <0.05)  
698 differentially upregulated genes.
- 699
- 700 **d.** Spearman correlation between all genes in a microarray analysis of dauer larvae that were  
701 induced by starvation and *ilc-17.1* deletion larvae grown for 34-36 hrs. at 25°C.  
702 \*\*\*p < 0.001.
- 703
- 704 **e.** Heatmap depicting expression levels (log<sub>2</sub> normalized counts) of the major dauer-specific  
705 collagens in the *ilc-17.1* (syb5296) X deletion mutants, *ilc-17.1* (syb5296) X deletion  
706 mutants rescued by the overexpression of ILC-17.1::FLAG in the body wall muscle and  
707 wildtype (N2).

Figure S3

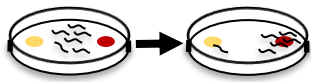

a

Day-one adults placed at center of plate and control and odor at opposite ends.  
Chemotaxis index, after 1 hour

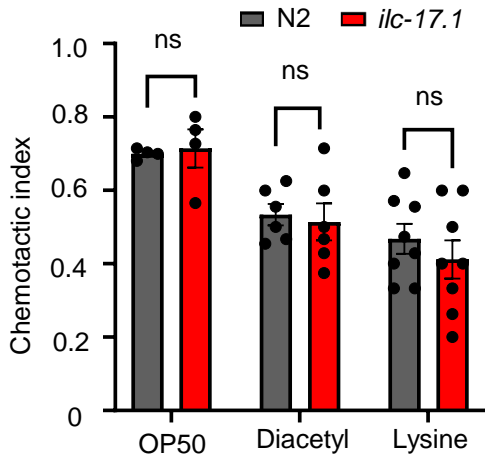

b

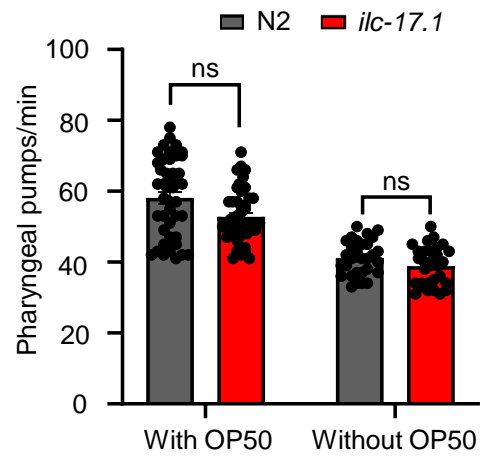

c

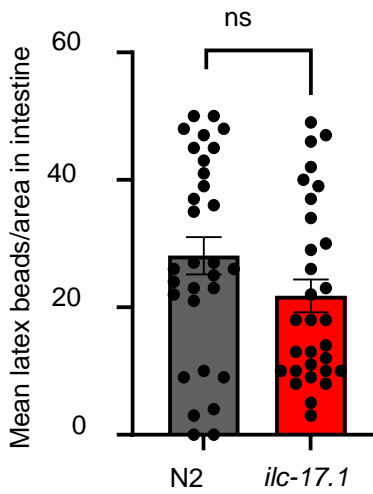

708 **Supplementary Figure S3: Lack of ILC-17.1 does not affect the animals' sensory perception**

709 **of food.**

710 **a.** Chemotaxis index towards OP50, 0.01% v/v diacetyl, and 1M lysine for *ilc-17.1* (syb5296)  
711 X deletion mutants and wildtype (N2) day-one adults at 20°C. *n*= 5-8 experiments. ns, not  
712 significant (unpaired t-test).

713  
714 **b.** Number of pharyngeal pumps/min in *ilc-17.1* (syb5296) X deletion mutants and wildtype  
715 (N2) day-one adults at 20°C, on OP50 lawns, and on plates without food. *n*= 3  
716 experiments, with at least 5 animals/experiment scored. The pumping rates of individual  
717 animals is depicted. ns, not significant (unpaired t-test).

718  
719 **c.** Average numbers of fluorescent latex beads in similar areas of distal gut lumen of 40-hour  
720 *ilc-17.1* (syb5296) X deletion mutant and wildtype (N2) larvae at 20°C. *n*= 3 experiments,  
721 with at 10 animals/experiment. The numbers of beads in individual animals is depicted.  
722 ns, not significant (unpaired t-test).

723  
724 Data in all graphs show mean  $\pm$  s.e.m.

725



Figure S4

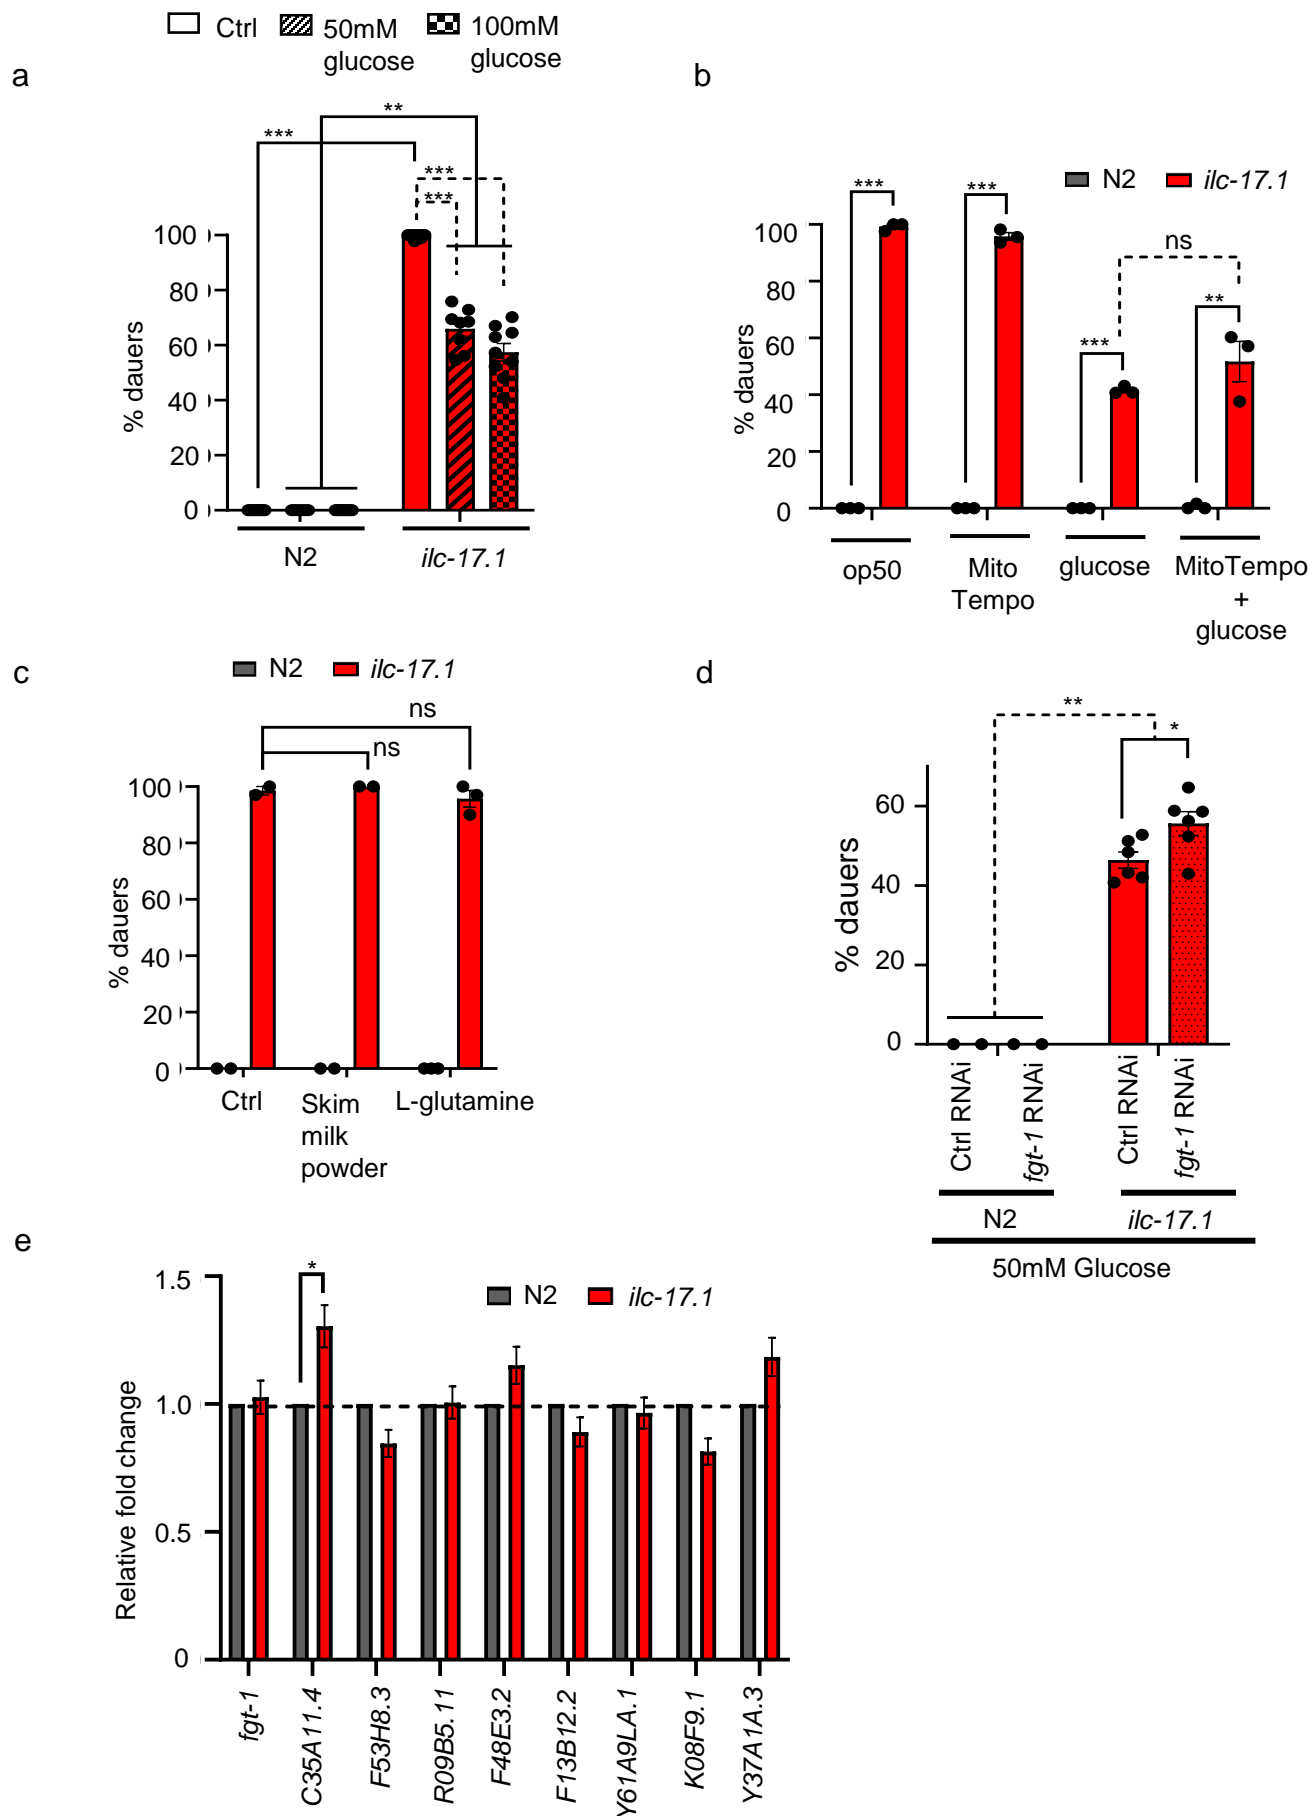

726 **Supplementary Figure S4: ILC-17.1 deficiency inhibits glucose utilization.**

727 **a.** Percent dauers amongst *ilc-17.1* (syb5296) X deletion mutants and wildtype (N2) larvae  
728 on 50mM and 100 mM glucose at 25°C.  $n= 5-9$  experiments.  $***p < 0.001$ ,  $**p < 0.01$ ,  
729 (analysis of variance (ANOVA) with Tukey's correction).

730

731 **b.** Percent dauers amongst *ilc-17.1* (syb5296) X deletion mutants and wildtype (N2) larvae  
732 on 50mM glucose upon exposure to 0.1mM MitoTEMPO at 25°C.  $n= 3$  experiments  
733  $***p < 0.001$ ,  $**p < 0.01$ , ns, not significant, (analysis of variance (ANOVA) with Tukey's  
734 correction).

735

736 **c.** Percent dauers amongst *ilc-17.1* (syb5296) X deletion mutants and wildtype (N2) larvae  
737 on 20mM Skim Milk powder and 0.26mM L-Glutamine at 25°C.  $n= 3$  experiments. ns, not  
738 significant, (unpaired t-test).

739

740 **d.** Percent dauers amongst *ilc-17.1* (syb5296) X deletion mutants and wildtype (N2) larvae  
741 on 50mM glucose on Control (Ctrl; L4440) and *fgt-1* RNAi.  $n= 6$  experiments.  $**p < 0.01$ ,  
742  $*p < 0.05$ . (unpaired t-test).

743

744 **e.** Average mRNA levels of GLUTs in *ilc-17.1* (syb5296) X deletion mutants relative to  
745 wildtype (N2). mRNA levels were determined relative to *pmp-3* and normalized to that in  
746 wildtype (N2).  $n=3$  experiments, 30 day-one adults each.  $*p < 0.05$ , (unpaired t-test).

747

748 Data in all graphs show mean  $\pm$  s.e.m.

Figure S5

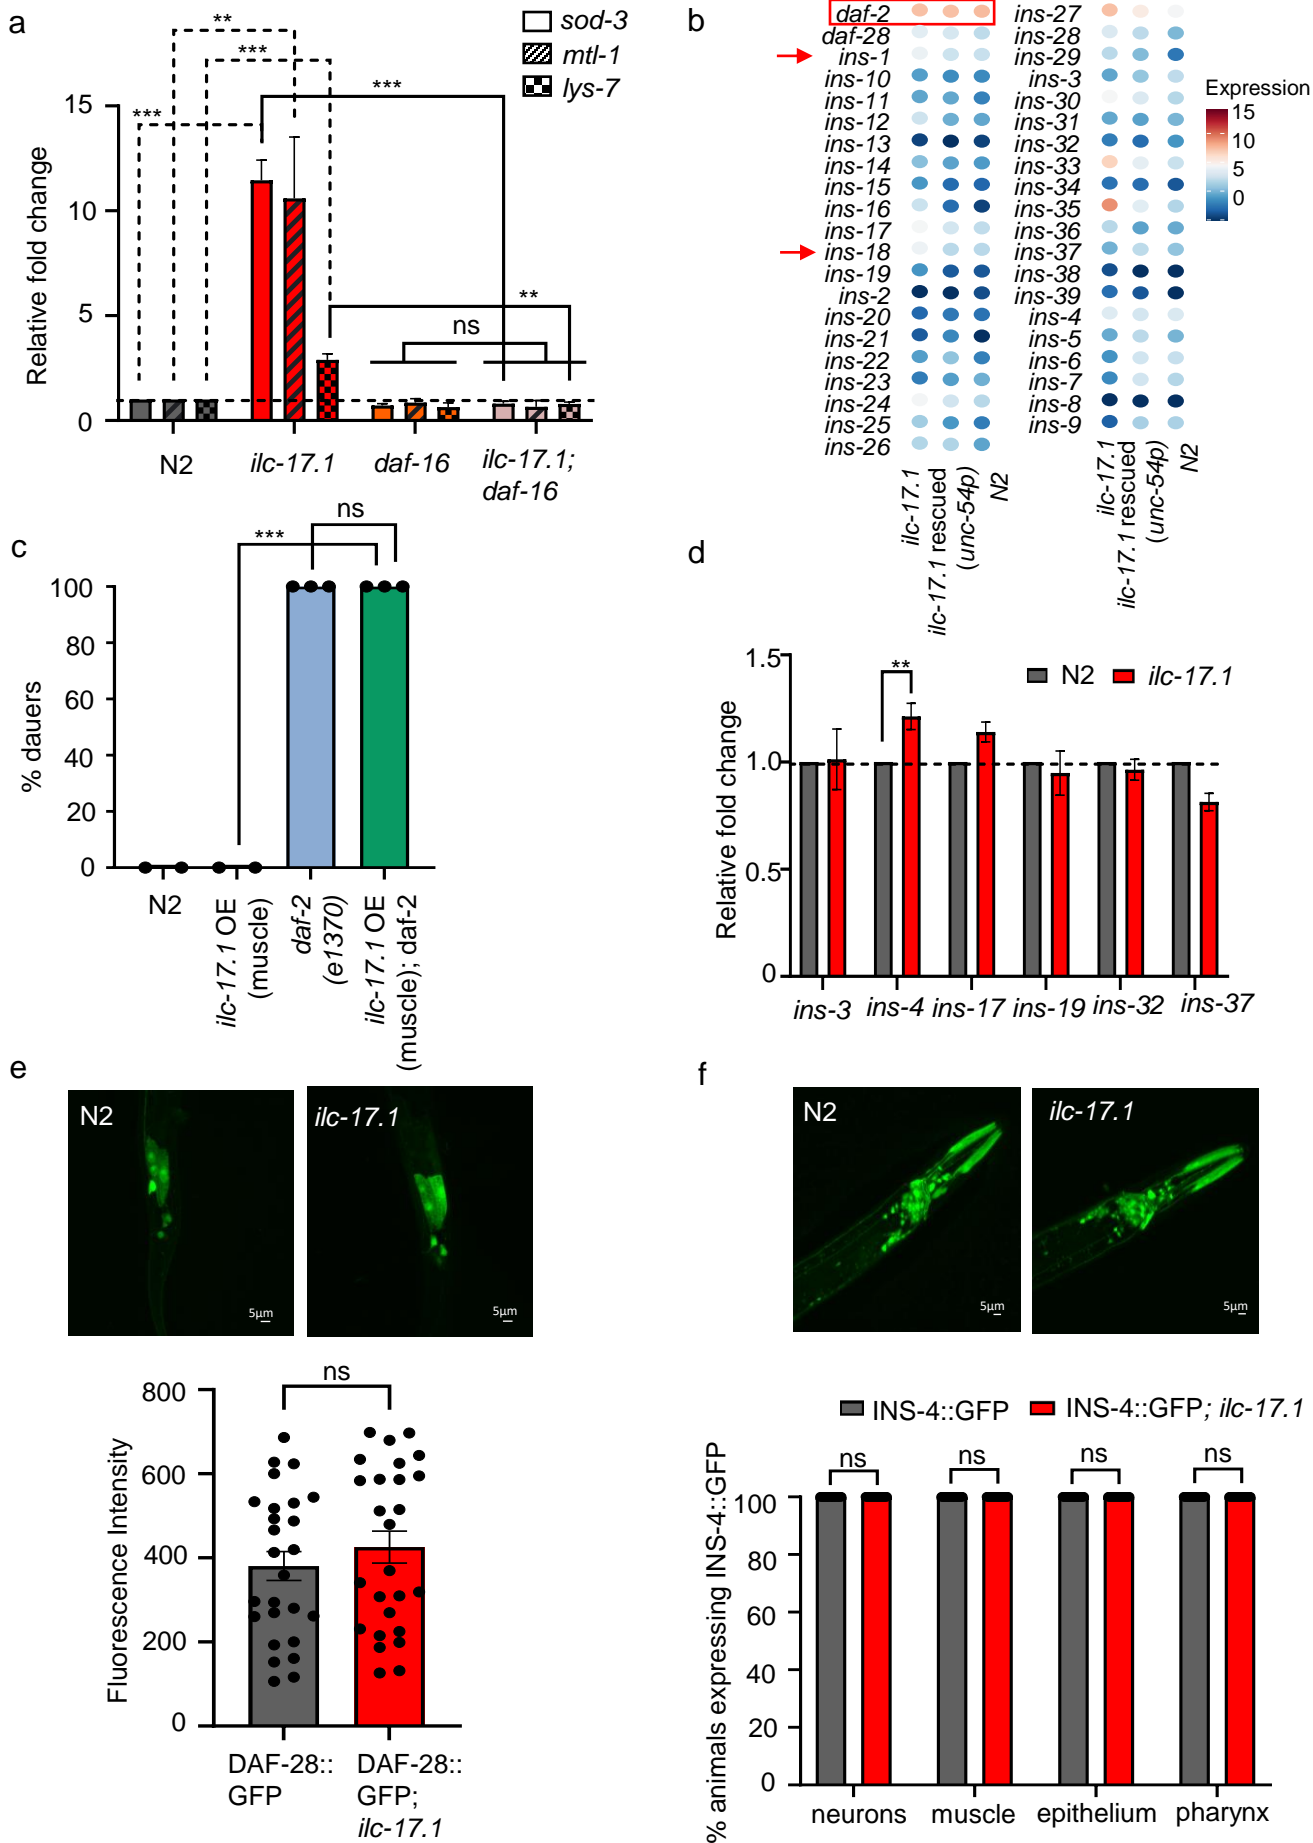

749 **Supplementary Figure S5: ILC-17.1 deficiency does not act through reduced insulin**  
750 **signaling (rIS) to induce dauer arrest.**

751 **a.** Average *sod-3*, *mtl-1*, and *lys-7* mRNA levels in 40 hr. old larvae grown at 20°C. mRNA  
752 levels were determined relative to *pmp-3* and normalized to that in wildtype (N2). *n*=3  
753 experiments. \*\*\**p* < 0.001, \*\**p* < 0.01, (unpaired t-test).

754  
755 **b.** Heatmap depicting expression levels (log<sub>2</sub> normalized counts) of *daf-2* (boxed) and insulin  
756 ligands in the *ilc-17.1 (syb5296)* X deletion mutants, *ilc-17.1 (syb5296)* X deletion mutants  
757 rescued by ILC-17.1::FLAG in the body wall muscle, and wildtype (N2). Arrows highlight  
758 lack of changes in *ins-1* and *ins-18* mRNA. RNA-seq data from larvae grown for 34-36  
759 hrs. at 25°C.

760  
761 **c.** Percent dauers; overexpression of ILC-17.1::FLAG in the body wall muscle of *daf-*  
762 *2(e1370)III* strains does not rescue their dauer arrest. *n*=3 experiments. \*\*\**p* < 0.001, ns,  
763 not significant (unpaired t-test).

764  
765 **d.** Average mRNA levels (insulins) in 34-36 hr. larvae grown at 25°C. mRNA levels were  
766 determined relative to *pmp-3* and normalized to that in wildtype (N2). *n*=3 experiments.  
767 \*\**p* < 0.001, (unpaired t-test).

768  
769 **e. Top:** Representative micrographs showing DAF-28::GFP expression in the last intestinal  
770 cell of 34-36hr larvae at 25°C of *ilc-17.1 (syb5296)* X deletion mutants and wildtype (N2).  
771 Images are projections of confocal z-planes. Scale bar: 5µm. **Bottom:** Quantification of  
772 fluorescent intensity of DAF-28: GFP. *n*=3 experiments. The fluorescent intensity of DAF-  
773 28::GFP in individual animals is depicted. ns, not significant (unpaired t-test).

774

775        **f. Top:** Representative micrographs showing INS-4: GFP expression in the pharyngeal  
776        muscle, neurons, and pharynx of 34-36hr larvae at 25°C in *ilc-17.1 (syb5296)* X deletion  
777        mutants and wildtype (N2). Images are projections of confocal z-planes. Scale bar: 5µm.  
778        **Bottom:** Percent larvae that expressed GFP in the different tissues where INS-4 is known  
779        to be expressed. *n*=3 experiments of 5-10 larvae of each strain. ns, not significant  
780        (unpaired t-test).

781

782        Data in all graphs show mean ± s.e.m.

Figure S6

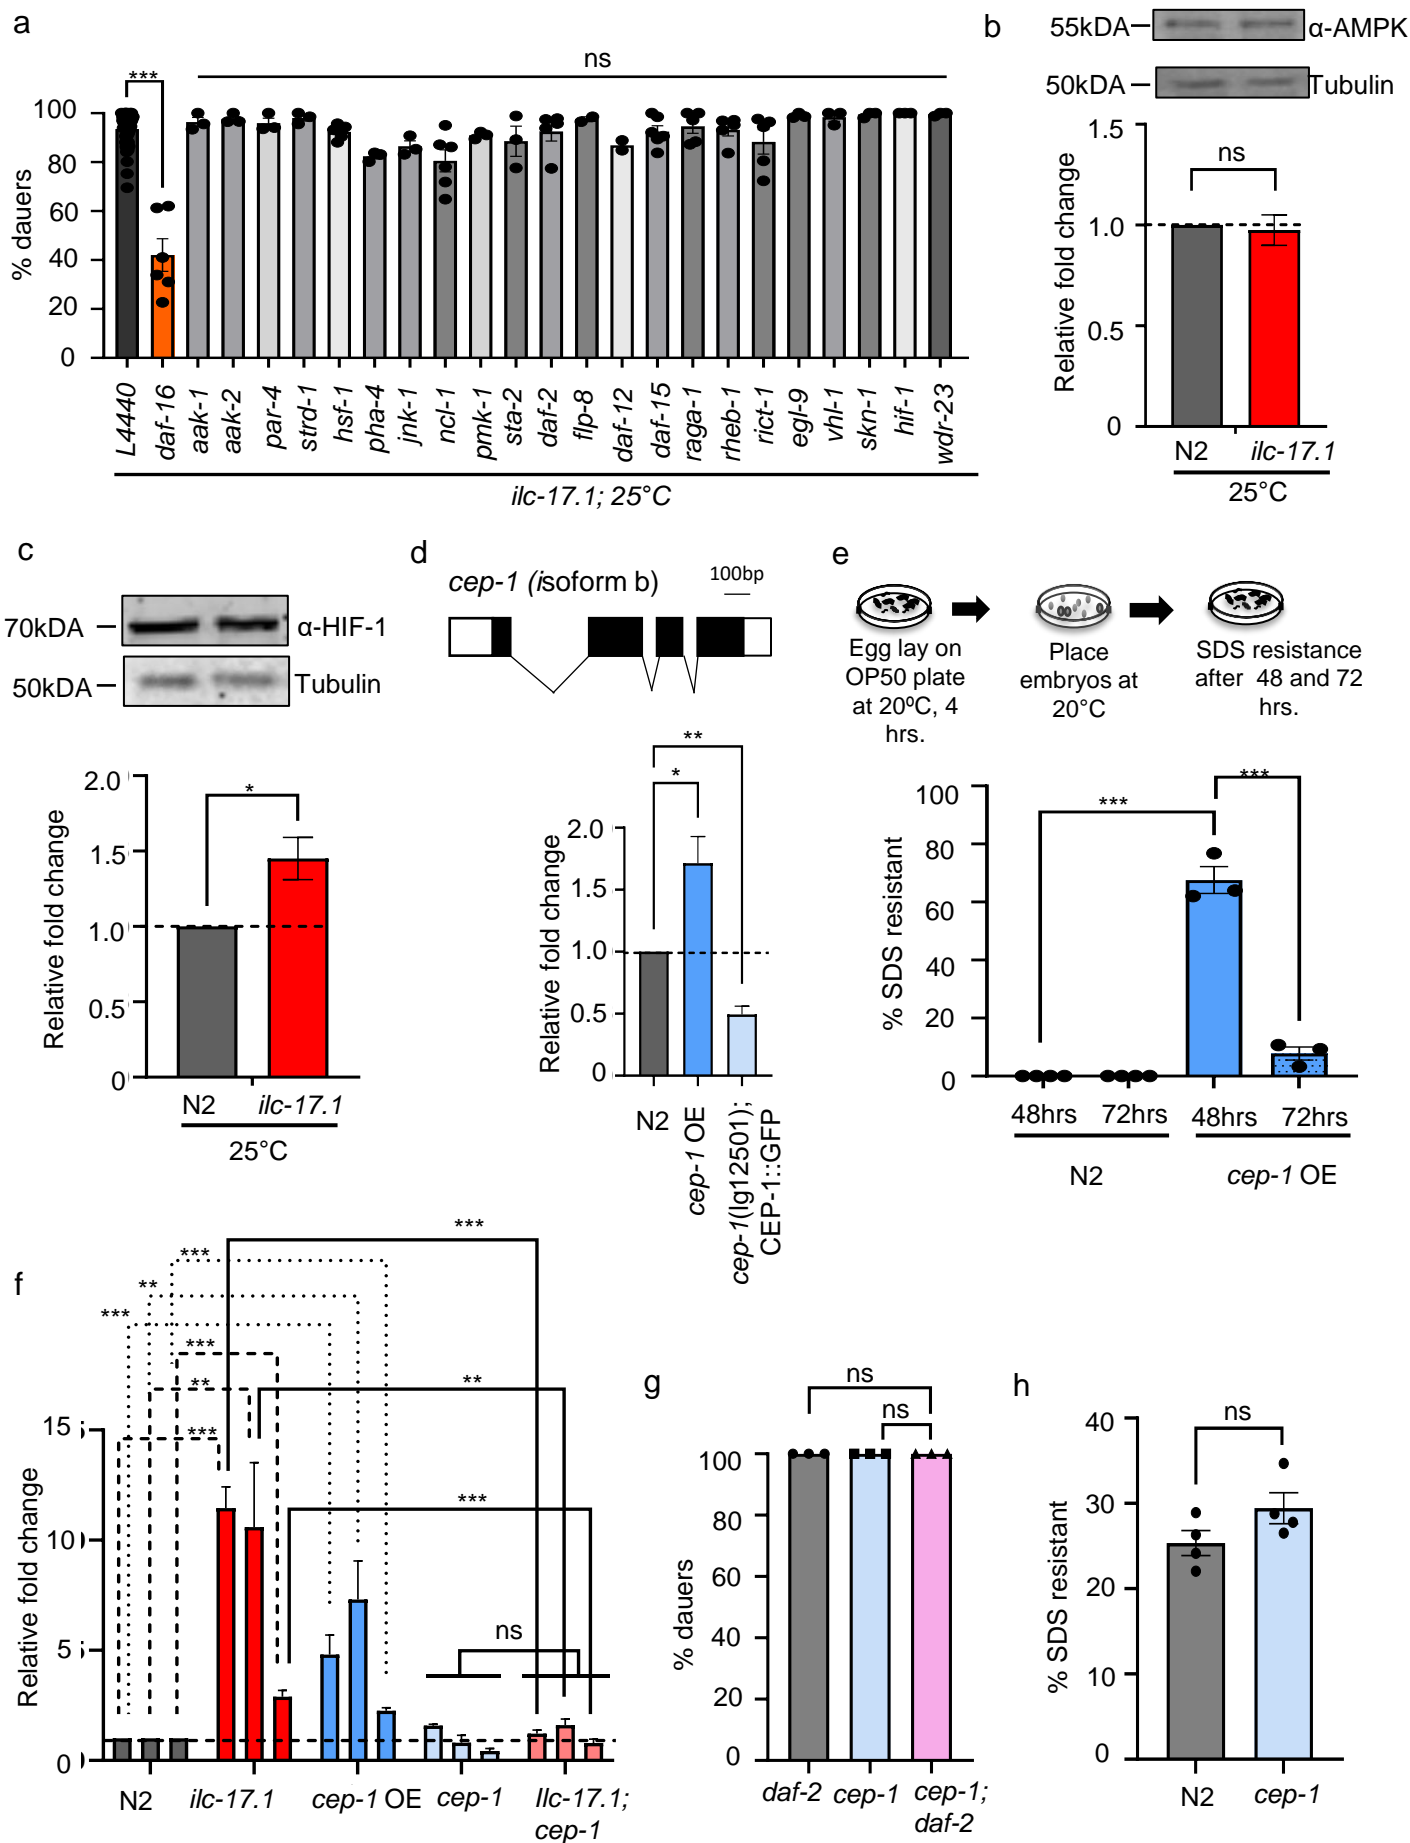

783 **Supplementary Figure S6: ILC-17.1 deficiency triggers CEP-1/p53 activation to induce**  
784 **dauer arrest.**

785 **a.** Percent dauers in *ilc-17.1* (*syb5296*) X deletion mutant larvae following RNAi-mediated  
786 downregulation of several genes known to interact with DAF-16. *daf-16* RNAi was used  
787 as positive control.  $n=3-5$  experiments. \*\*\* $p < 0.001$ , ns, not significant (unpaired t-test).

788  
789 **b. Top:** Representative Western blot showing (upper panel) phospho-AMPK levels in *ilc-17.1*  
790 (*syb5296*) X deletion mutant larvae and wildtype (N2); (lower panel) tubulin, loading  
791 control. **Bottom:** Quantification of Phospho-AMPK levels relative to tubulin and  
792 normalized to control animals.  $n=3$  experiments. ns, not significant (unpaired t-test).

793  
794 **c. Top:** Representative Western blot showing (upper panel) HIF-1 in *ilc-17.1* (*syb5296*) X  
795 deletion mutant larvae and wildtype (N2); (lower panel) tubulin, loading control. **Bottom:**  
796 Quantification of HIF-1 levels relative to tubulin and normalized to control animals.  $n=3$   
797 experiments. \* $p < 0.05$  (unpaired t-test).

798  
799 **d. Top:** Schematic of *cep-1* mRNA, isoform b. **Bottom:** Average *cep-1* isoform b mRNA  
800 levels in 34-36 hr. larvae grown at 25°C. mRNA levels were determined relative to *pmp-3*  
801 and normalized to that in wildtype (N2).  $n=3$  experiments, 400 larvae each. \*\* $p < 0.001$ ,  
802 \* $p < 0.05$  (unpaired t-test).

803  
804 **e. Top:** Schematic of SDS treatment to assess dauer formation at 20°C. Percent of wildtype  
805 (N2) and *cep-1* overexpressing larvae (*cep-1* OE) that enter a dauer state during  
806 development, 48 hours and 72 hrs. post-hatching at 20°C.  $n=3$  experiments. \*\*\* $p < 0.001$ ,  
807 (analysis of variance (ANOVA) with Tukey's correction).

808

809 **f.** Average *sod-3*, *mtl-1*, and *lys-7* mRNA levels in 40 hr. larvae grown at 20°C. mRNA levels  
810 were determined relative to *pmp-3* and normalized to that in wildtype (N2). *n*=6-10  
811 experiments. \*\*\**p* < 0.001, \*\**p* < 0.01, ns, not significant. (unpaired t-test).

812

813 **g.** Percent dauers in *daf-2* (e1370) and *daf-2* (e1370); *cep-1* (gk138). Note: no rescue. *n*=3  
814 experiments. ns, not significant. (unpaired t-test).

815

816 **h.** Percent high temperature (27.5 °C; HID phenotype) dauers in wildtype (N2) and *cep-1*  
817 deletion mutants *cep-1*(*gk138*). *n*=4 experiments. ns, not significant. (unpaired t-test).

818

819 Data in all graphs show mean ± s.e.m.



Figure S7

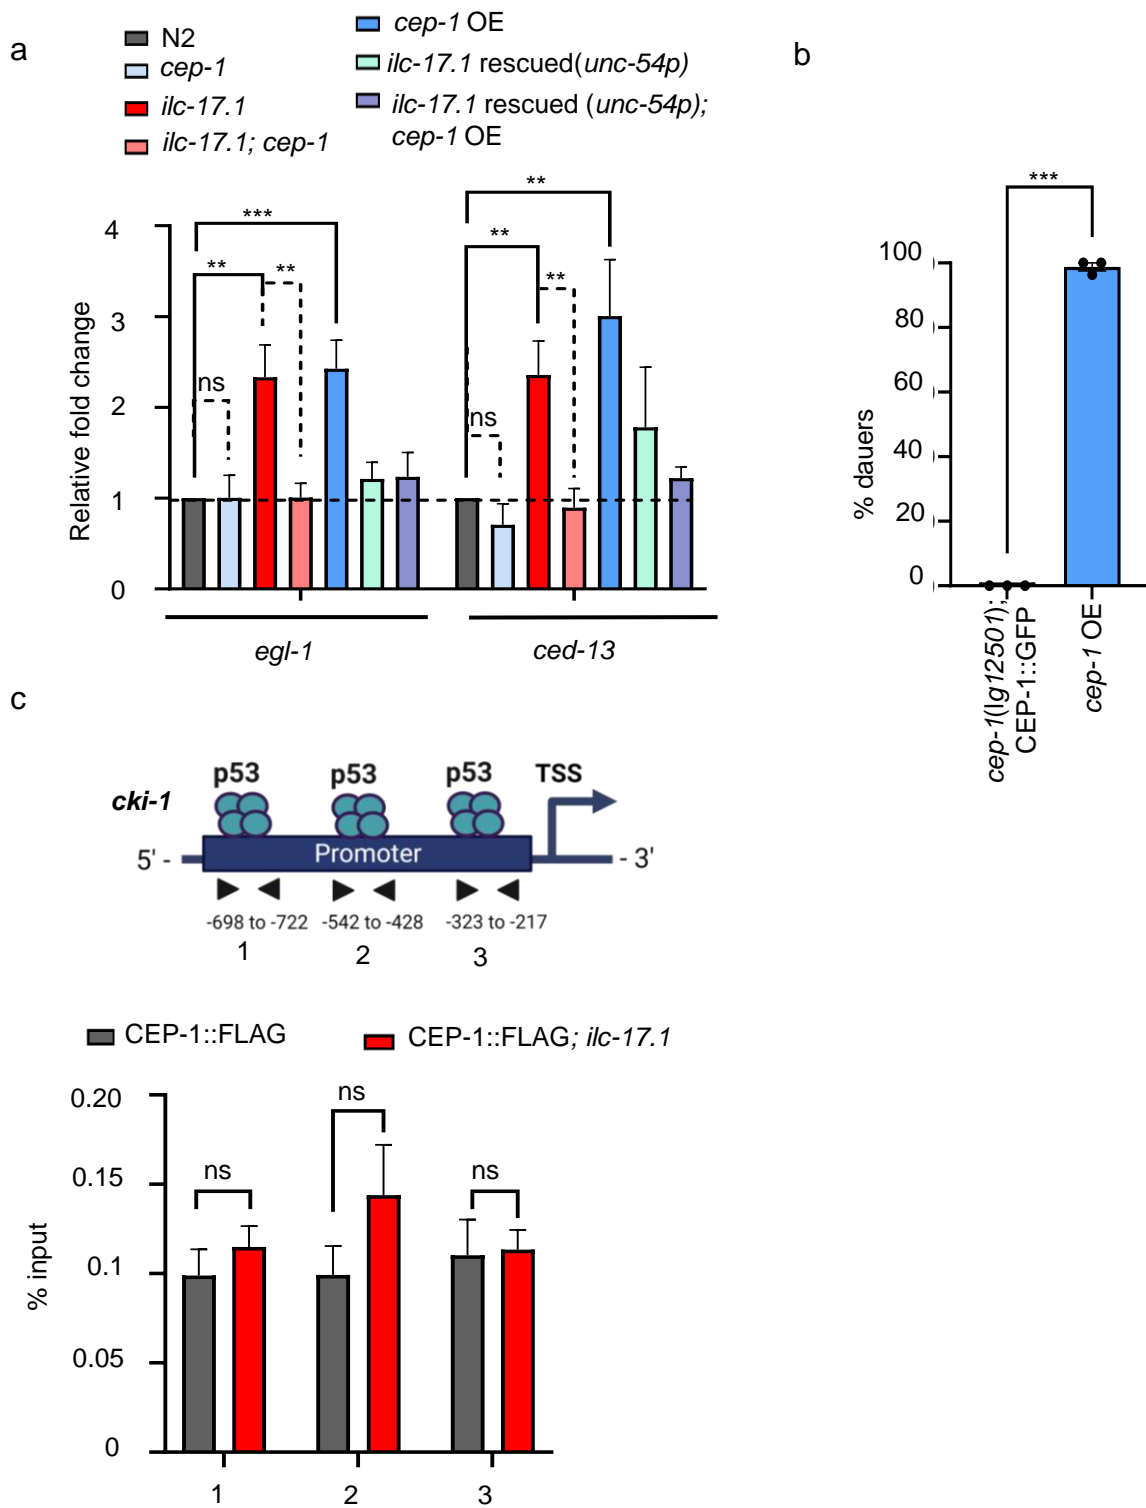

820 **Supplementary Figure S7: CEP-1/p53 is active even under optimal growth conditions in *ilc-***

821 **17.1 deletion mutants and indirectly upregulates the p21 ortholog, *cki-1*.**

822 **a.** Average *egl-1* and *ced-13* mRNA levels in 40 hr. larvae grown at 20°C. mRNA levels were  
823 determined relative to *pmp-3* and normalized to that in wildtype (N2). *n*=6-7 experiments.  
824 \*\*\**p* < 0.001, \*\**p* < 0.01, ns, not significant (unpaired t-test).

825  
826 **b.** Percent dauers upon expression of a functional, rescuing CEP-1::GFP translational fusion  
827 in a wildtype (N2) background with intact endogenous *cep-1* gene [i.e. *cep-1*  
828 overexpression; *cep-1* OE], versus expression of the same construct in a *cep-1* deletion  
829 background, *cep-1(lg12501)*, where endogenous CEP-1 is not expressed [*cep-*  
830 *1(lg12501)*; CEP-1::GFP]. mRNA levels in **Supplementary Figure S6d**. *n*=3  
831 experiments. \*\*\**p* < 0.001. (unpaired t-test).

832  
833 **c.** CEP-1 occupancy (expressed as percent input) in 34-36 hr. larvae grown at 25°C,  
834 measured at three promoter proximal regions of *cki-1* (Schematic on top). Strains used:  
835 CEP-1::FLAG expressing animals in control wild-type background (Ctrl), in *ilc-*  
836 *17.1(syb5296)* X background. *n*=4 experiments. ns, not significant. (unpaired t-test).

837

838 Data in all graphs show mean ± s.e.m.

Figure S8

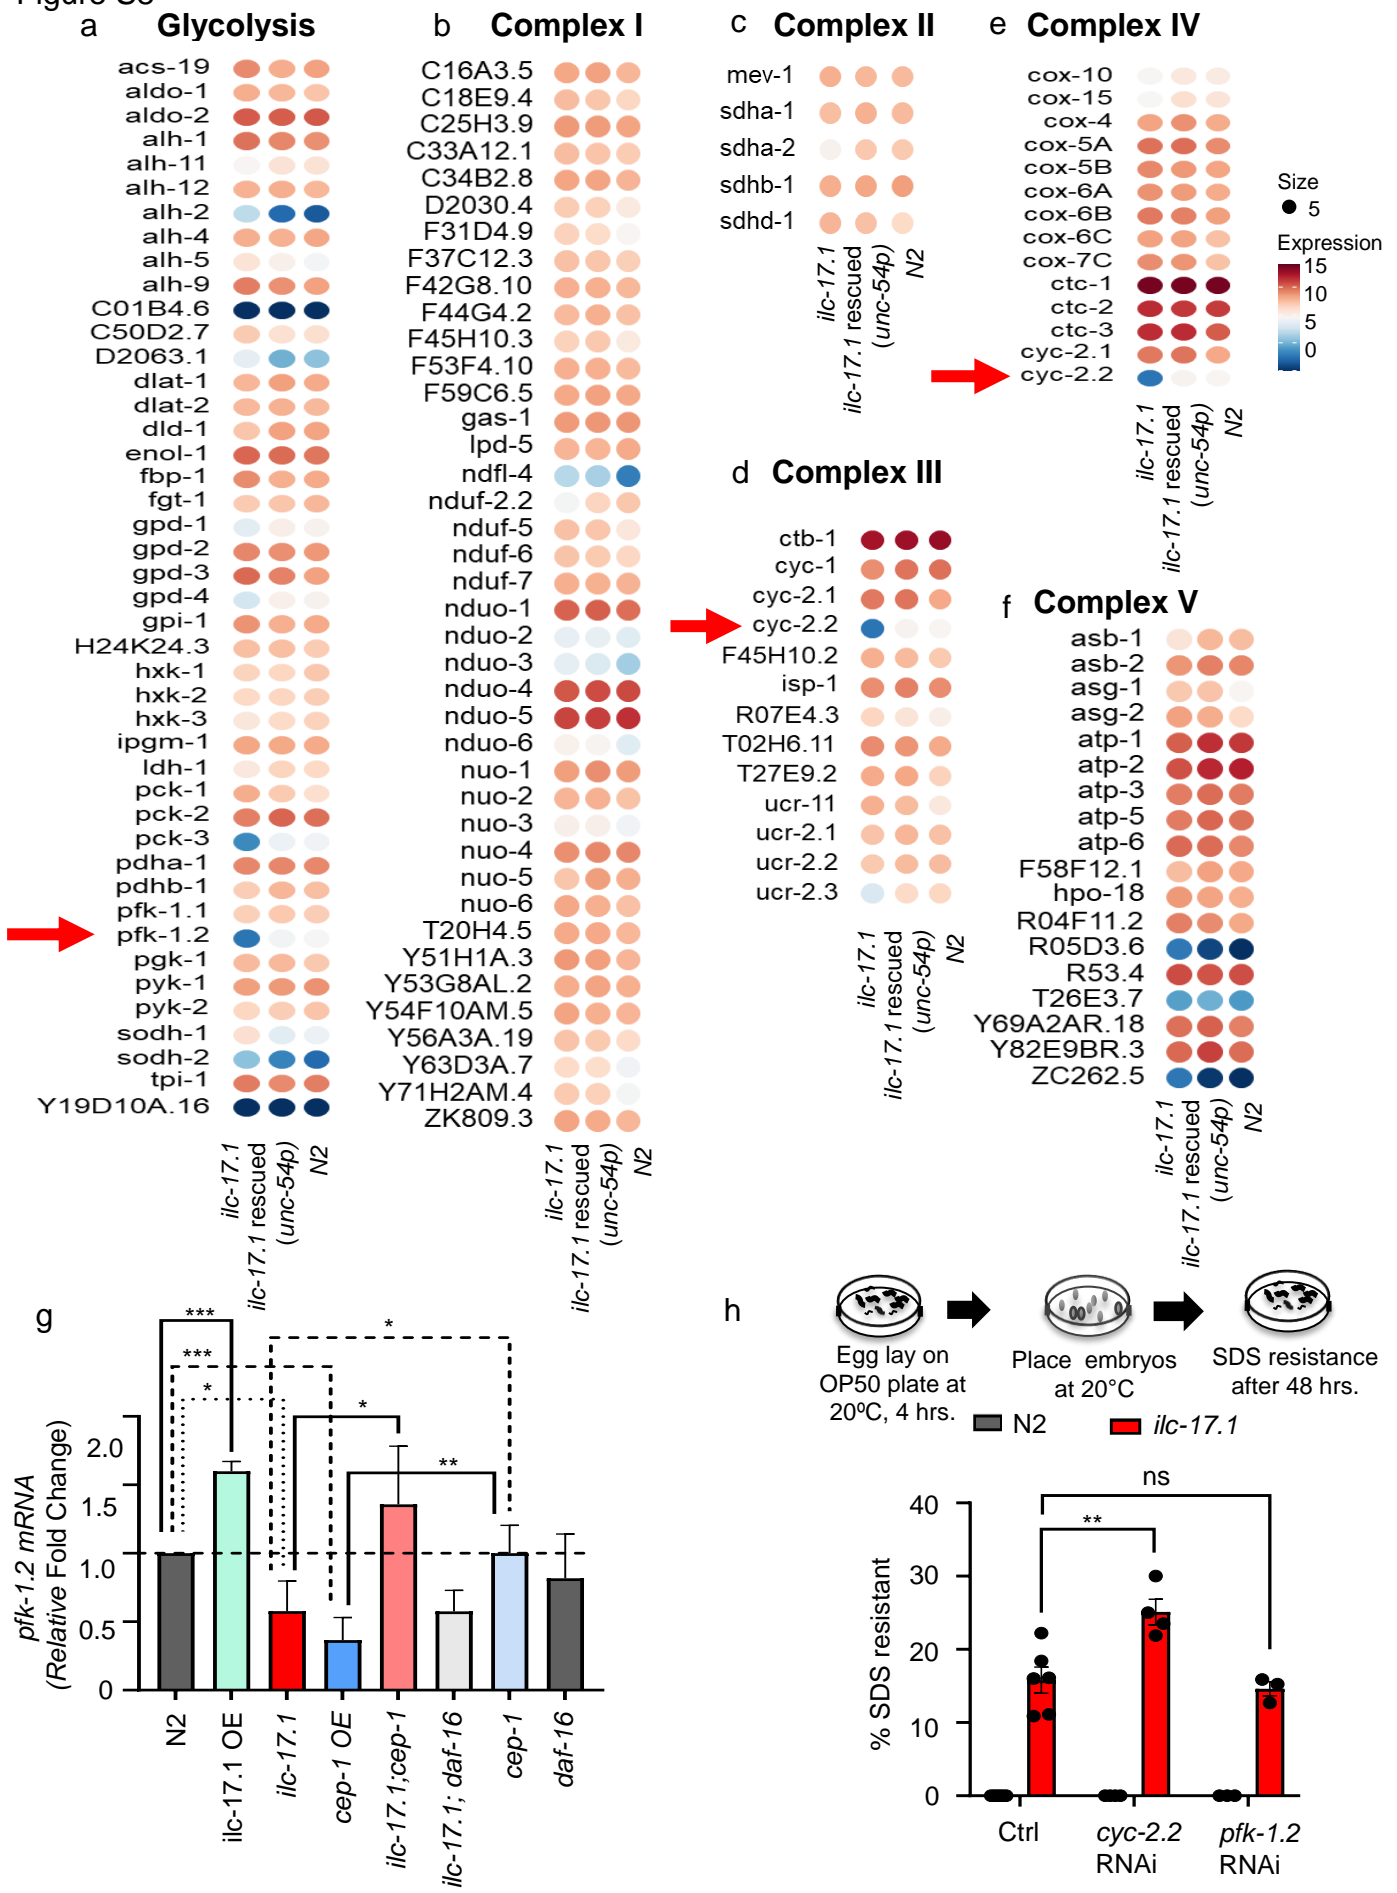

839 **Supplementary Figure S8: ILC-17.1 deficiency and CEP-1/p53 activation modulates key**  
840 **glucose metabolic enzymes.**

841 **a-f.** Heatmap depicting expression levels ( $\log_2$  normalized counts) of glycolysis and mitochondrial  
842 OXPHOS genes in the *ilc-17.1* (*syb5296*) X deletion mutants, *ilc-17.1* (*syb5296*) X deletion  
843 mutants rescued by the overexpression of ILC-17.1::FLAG in the body wall muscle, and  
844 wildtype (N2). Arrows highlight decreases in *pfk-1.2* and *cyc-2.2* mRNA levels in *ilc-17.1*  
845 mutants. RNA-seq data was collected as previously described.

846

847 **g.** Average *pfk-1.2* mRNA levels in 34-36 hr. old larvae grown at 25°C. mRNA levels were  
848 determined relative to *pmp-3* and normalized to that in wildtype (N2).  $n=4-6$  experiments.  
849 \*\*\* $p < 0.001$ , \*\* $p < 0.01$ , \* $p < 0.05$ . (unpaired t-test).

850

851 **h. Top:** Schematic of SDS treatment to assess dauer formation at 20°C. Percent of wildtype  
852 (N2) and *ilc-17.1* (*syb5296*) X deletion mutants larvae that enter a dauer state at 20°C when  
853 subjected to control (L4440; Ctrl), *cyc-2.2* and *pfk-1.2* RNAi. SDS-resistant dauers scored 48  
854 hours post-hatching.  $n=3-4$  experiments. \*\* $p < 0.01$ , (analysis of variance (ANOVA) with  
855 Tukey's correction).

856

857 Data in all graphs show mean  $\pm$  s.e.m.

Figure S9

a

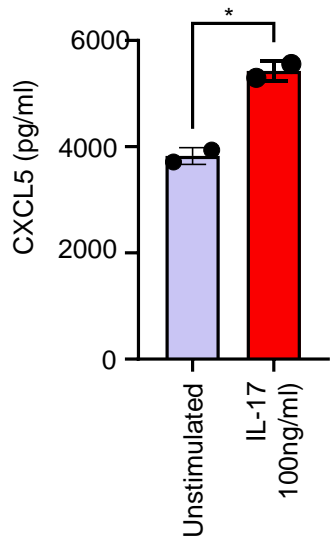

858 **Supplementary Figure S9: rIL-17 induces the expected cytokine response in human**  
859 **epithelial cells.**

- 860     **a.** Soluble CXCL5 levels in the supernatant of A459 epithelial cells stimulated for 18hrs  
861         with rIL-17 measured by ELISA. Data is a summary of 2 independent experiments,  
862         performed in triplicates. \* $p < 0.05$ , (unpaired t-test). Data show mean  $\pm$  s.e.m.

863 **Materials and Methods**

864 ***C. elegans* strains**

865 *C. elegans* strains used in this study are listed in Table 1. Strains were procured from  
 866 Caenorhabditis Genetics Center (CGC, Twin Cities, MN), generated in the laboratory or  
 867 generated by Suny Biotech (Suzhou, Jiangsu, China 215028).

868 **Table 1**

| Strain Name                              | Gene name                                                                                                                                  | Source                         | Additional information                                   |
|------------------------------------------|--------------------------------------------------------------------------------------------------------------------------------------------|--------------------------------|----------------------------------------------------------|
| N2, <i>C. elegans</i> var <i>Bristol</i> | N2, Wild-type                                                                                                                              | Caenorhabditis Genetics Center |                                                          |
| TJ1                                      | <i>cep-1</i> (gk138) I                                                                                                                     | Caenorhabditis Genetics Center |                                                          |
| CF1038                                   | <i>daf-16</i> (mu86) I                                                                                                                     | Caenorhabditis Genetics Center |                                                          |
| TG12                                     | <i>cep-1</i> (lg12501) I; <i>unc-119</i> (ed4) III; <i>gtIs1</i> [CEP-1::GFP + <i>unc-119</i> (+)]                                         | Caenorhabditis Genetics Center | Pcep-1::CEP-1(let-585 3'UTR)::GFP; from construct pRH53  |
| CB1370                                   | <i>daf-2</i> (e1370) III                                                                                                                   | Caenorhabditis Genetics Center |                                                          |
| VEP024                                   | <i>praEx021</i> ( <i>ilc-17.1p</i> :: <i>ilc-17.1</i> cDNA::3XFLAG:: <i>ilc-17.1</i> 3'UTR; <i>pmyo-2</i> ::mCherry:: <i>unc-54</i> 3'UTR) | Prahlad Lab                    | ILC-17.1 overexpression under its own promoter and 3'UTR |

|        |                                                                                                                |                              |                                                                                                                                                                       |
|--------|----------------------------------------------------------------------------------------------------------------|------------------------------|-----------------------------------------------------------------------------------------------------------------------------------------------------------------------|
| VEP031 | <i>praEx022 (unc-54p::ilc-17.1 cDNA::3XFLAG::tbb-2 3'UTR; pdat-1::GFP::unc-54 3'UTR)</i>                       | Prahlad Lab                  | ILC-17.1 overexpression under the muscle promoter and 3'UTR                                                                                                           |
| VEP032 | <i>ilc-17.1 (syb5296) X</i>                                                                                    | Prahlad Lab/<br>SunnyBiotech | <i>ilc-17.1</i> deletion, 2173bp deletion, and the 15bp and 127bp sequences were left in the 5' and 3' deletion end, respectively of the 2135 bp <i>ilc-17.1</i> gene |
| VEP033 | <i>ilc-17.1 (syb5296) X; praEx022 (unc-54p::ilc-17.1 cDNA::3XFLAG::tbb-2 3'UTR; pdat-1::GFP::unc-54 3'UTR)</i> | Prahlad Lab                  | ILC-17.1 paracrine rescue of <i>ilc-17.1</i> deletion                                                                                                                 |
| VEP034 | <i>ilc-17.1 (syb5296)X; cep-1 (gk138) I</i>                                                                    | Prahlad Lab                  |                                                                                                                                                                       |
| VEP035 | <i>ilc-17.1 (syb5296); daf-16 (mu86) I</i>                                                                     | Prahlad Lab                  |                                                                                                                                                                       |
| VEP036 | <i>unc-119 (ed4); gtl1 [CEP-1::GFP + unc-119 (+)]</i>                                                          | Prahlad Lab                  | CEP-1 overexpression (ref: <sup>65</sup> )                                                                                                                            |
| VEP037 | <i>ilc-17.1 (syb5296); praEx022 (unc-54p::ilc-17.1 cDNA:: 3XFLAG::tbb-2 3'UTR; pdat-1::GFP::unc-54</i>         | Prahlad Lab                  | IL-17.1 overexpression; CEP-1/p53 overexpression                                                                                                                      |



|        |                                                                                                                                                                                                |                              |                                                         |
|--------|------------------------------------------------------------------------------------------------------------------------------------------------------------------------------------------------|------------------------------|---------------------------------------------------------|
|        | 3'UTR); <i>unc-119</i> (ed4); <i>gtIs1</i> [CEP-1::GFP + <i>unc-119</i> (+)]                                                                                                                   |                              |                                                         |
| VEP038 | <i>ilc-17.1</i> (syb5296); <i>praEx022</i> ( <i>unc-54p::ilc-17.1</i> cDNA::3XFLAG:: <i>tbb-2</i> 3'UTR; <i>pdat-1::GFP::unc-54</i> 3'UTR); <i>daf-2</i> (e1370) III                           | Prahlad Lab                  |                                                         |
| VEP039 | <i>daf-2</i> (e1370) III; <i>cep-1</i> (gk138) I                                                                                                                                               | Prahlad Lab                  |                                                         |
| VEP040 | <i>cep-1</i> ((syb6099) [ <i>cep-1::3XFLAG</i> ]) I                                                                                                                                            | Prahlad Lab/<br>SunnyBiotech | Endogenous <i>cep-1</i> 3X<br>FLAG tagged at C-terminus |
| VEP041 | <i>ilc-17.1</i> (syb5296)X ; <i>cep-1</i> (pra02 [ <i>cep-1::3XFLAG</i> ]) I                                                                                                                   | Prahlad Lab                  |                                                         |
| VEP042 | <i>praEx022</i> ( <i>unc-54p::ilc-17.1</i> cDNA::3XFLAG:: <i>tbb-2</i> 3'UTR; <i>pdat-1::GFP::unc-54</i> 3'UTR); <i>ilc-17.1</i> (syb5296) X ; <i>cep-1</i> (pra02 [ <i>cep-1::3XFLAG</i> ]) I | Prahlad Lab                  |                                                         |
| VEP043 | <i>ilc-17.1</i> (pra03 [ <i>ilc-17.1::SL2::mCherry</i> ]) X                                                                                                                                    | Prahlad Lab/<br>SunnyBiotech |                                                         |
| VEP044 | <i>ilc-17.1</i> (pra04 [ <i>ilc-17.1::3xHA</i> ]) X                                                                                                                                            | Prahlad Lab/<br>SunnyBiotech |                                                         |
| VEP045 | <i>ilcr-2</i> (pra05 [ <i>ilcr-2::SL2::GFP</i> ]) II                                                                                                                                           | Prahlad Lab/<br>SunnyBiotech |                                                         |

869

870 **Generation of CRISPR strains**

871 CRISPR/Cas9 was used to create following *C. elegans* strains:

| Background Strain                    | Type of editing                   | Description/position of editing                                                                                                             | Gene                 | Resulting strain |
|--------------------------------------|-----------------------------------|---------------------------------------------------------------------------------------------------------------------------------------------|----------------------|------------------|
| N2, <i>C. elegans</i><br>var Bristol | Deletion<br>(syb5296)             | 2173bp deletion, and the 15bp and 127bp sequences were left in the 5' and 3' deletion end, respectively of the 2135 bp <i>ilc-17.1</i> gene | ( <i>ilc-17.1</i> )X | VEP032           |
| N2, <i>C. elegans</i><br>var Bristol | Insertion;<br><i>SL2::mCherry</i> | C'-terminus                                                                                                                                 | ( <i>ilc-17.1</i> )X | VEP043           |
| N2, <i>C. elegans</i><br>var Bristol | Insertion; 3X<br>HA               | C'-terminus                                                                                                                                 | ( <i>ilc-17.1</i> )X | VEP044           |
| N2, <i>C. elegans</i><br>var Bristol | Insertion;<br><i>SL2::GFP</i>     | C'-terminus                                                                                                                                 | ( <i>ilcr-2</i> )II  | VEP045           |
| N2, <i>C. elegans</i><br>var Bristol | Insertion; 3X<br>FLAG             | C'-terminus                                                                                                                                 | ( <i>cep-1</i> )I    | VEP040           |

872

## 873 Generation of transgenic strains

### 874 i) Generation of *cep-1* overexpression strain

875 TG12 (*cep-1*(lg12501) I; *unc-119*(ed4) III; [*CEP-1::GFP* + *unc-119*(+)] is a strain that expresses  
876 functional CEP-1 tagged with GFP, as determined by the rescue of *cep-1*(lg1250) phenotype<sup>68</sup>.

877 To overexpress CEP-1 we backcrossed the TG12 strain with wild-type (N2) worms and selected  
878 F2 progeny that were homozygous for the wild-type *cep-1* gene, lacked the *cep-1*(lg12501) I  
879 mutation (confirmed by PCR), and were homozygous for the *CEP-1::GFP* transgene (confirmed  
880 by 100% GFP expression amongst the F3 and F4 progeny). Overexpression of *cep-1* mRNA was

881 verified by qPCR (Supplementary Figure S6d). The CEP-1::GFP construct was PCR amplified  
882 from the final transgenic VEP037 *C. elegans* strain, and sequence verified.

883 **ii) Generation of ILC-17.1 overexpression strain under its own promoter and 3'UTR**

884 To generate the strain VEP024 – praEx021 [(*ilc-17.1p::ilc-17.1* (cDNA)::3xFLAG::*ilc-17.1*  
885 3'UTR); *pmyo-2::mCherry::unc-54* 3'UTR], which overexpressed *ilc-17.1* under the endogenous  
886 *ilc-17.1* promoter and *ilc-17.1* 3'UTR, we first amplified 3 kb of genomic sequence upstream of  
887 the translational start site (*ilc-17.1* promoter) and 1 kb of genomic sequence downstream from  
888 the translational stop codon (*ilc-17.1* 3' UTR). These regions were cloned using Gateway  
889 technology into pDONR221. *ilc-17.1* cDNA fused to C-terminal 3xFLAG sequence was  
890 synthesized as a gBlock (Integrated DNA technologies). These three fragments were then  
891 submitted for gene synthesis service through GenScript to generate the expression vector  
892 pUC57(*ilc-17.1p:: ilc-17.1* (cDNA)::3xFLAG:: *ilc-17.1* 3'UTR). All plasmids were sequence  
893 verified. The *ilc-17.1* expression vector was then injected at 97.5 ng/ul along with the co-  
894 injection marker pCFJ90 (*pmyo-2::mCherry::unc-54* 3'UTR) at 2.5 ng/ul by InVivo Biosystems  
895 injection express service. Animals expressing mCherry were singled, lines transmitting the  
896 extrachromosomal array were established, and mCherry positive progeny were PCR verified to  
897 ensure they were transmitting *ilc-17.1p:: ilc-17.1* (cDNA)::3xFLAG:: *ilc-17.1* 3'UTR. These lines  
898 were then harvested for Western blot to verify expression of protein.

899 **iii) Generation of ILC-17.1 overexpression strain under the *unc-54* muscle promoter  
900 and *tbb-2* 3'UTR**

901 To generate VEP031, we overexpressed ILC-17.1 under muscle promoter by fusing - [(*unc-*  
902 *54p:: ilc-17.1* (cDNA)::3xFLAG] which was synthesized as a gBlock (Integrated DNA  
903 technologies) and *tbb-2* 3' UTR which was amplified from genomic DNA. The two fragments  
904 were cloned into pUC19 plasmid as the backbone using Gibson assembly<sup>103</sup> to create the  
905 overexpression plasmid [(*unc-54p:: ilc-17.1* (cDNA)::3xFLAG::*tbb-2* 3'UTR); *pdat-1::ssmito*] and  
906 sequence verified. The construct was injected at 100 ng/ul along with the co-injection marker

907 that expressed GFP in the dopaminergic neurons under a *dat-1* promoter [ *pdat-1*], at 10 ng/ul  
908 into wildtype (N2) worms. Animals expressing GFP in their dopaminergic neurons were singled,  
909 lines were established, and GFP-positive progeny were PCR verified to ensure that they were  
910 also transmitting harbored the *ilc-17.1* transgene. These lines were then harvested for Western  
911 blot to verify expression of protein.

912

### 913 **Growth conditions for *C. elegans* strains**

914 All strains were grown and maintained at 20°C unless otherwise mentioned. Animals were grown  
915 in 20°C incubators (humidity controlled) on 60mm nematode growth media (NGM) plates by  
916 passaging 8-15 L4s (depending on the strain) onto a fresh plates. Extra care was taken to ensure  
917 equal worm densities across all strains. Animals were fed *Escherichia coli* OP50 obtained from  
918 Caenorhabditis Genetics Center (CGC) that were seeded (OD<sub>600</sub>=1.5 and this was strictly  
919 maintained throughout the experiments) onto culture plates 2 days before use. The NGM plate  
920 thickness was controlled by pouring 8.9ml of autoclaved liquid NGM per 60mm plate. Laboratory  
921 temperature was maintained at 20°C and monitored throughout. For all experiments, age-  
922 matched day-one hermaphrodites, or larvae timed to reach specific developmental stages as  
923 mentioned in the figure legend, were used.

924

925 For all experiments with larvae, the timings were adjusted to account for the differences in growth  
926 rates at different temperatures. Thus, at 25°C, larvae were harvested 30-36 hrs. post bleach hatch  
927 or egg lay, and at 20°C, larvae were harvested 40 hrs. post bleach hatch or egg lay.

928

### 929 **Obtaining synchronized embryos by ‘bleach-hatching’**

930 Bleach-hatching’ was performed as previously described<sup>94</sup>. Populations of 250-300 gravid adults  
931 were generated by passaging L4s, as described above. These plates were used for obtaining  
932 synchronized embryos by bleach-induced solubilization of the adults. Specifically, animals were

933 washed off the plates with 1X PBS and pelleted by centrifuging at 2665Xg for 30s. The PBS was  
934 removed carefully, and worms were gently vortexed in the presence of bleaching solution [250µl  
935 1N NaOH, 200µl standard (regular) bleach and 550µl sterile water] until all the worm bodies had  
936 dissolved (approximately 5-6 minutes), and only eggs were viable. The eggs were pelleted by  
937 centrifugation (2665Xg for 45s), bleaching solution was carefully removed and then embryos were  
938 washed with sterile water 3-4 times and counted under the microscope. The desired number of  
939 embryos were seeded on fresh OP50 plates and allowed to grow at 20°C or 25°C for specific time  
940 periods depending on the experimental need. If >5% eggs remained unhatched, these plates  
941 were discarded.

942

#### 943 **Dauer Assay**

944 Embryos were allowed to hatch and grow on OP50 plates at 20°C or 25°C for this assay. Embryos  
945 were generated according to one of the following two methods: (i) Day-one gravid adults that had  
946 grown under normal culture conditions ( on OP50 at 20°C ) were bleach dissolved as described  
947 above, and ~50-100 embryos obtained from these gravid adults were seeded on fresh OP50  
948 plates or (ii) day-one gravid adults were allowed to lay eggs on fresh OP50 (or RNAi) plates for  
949 2-4 hours at 20°C, the adults were removed. and then embryos were allowed to develop at 20°C  
950 or 25°C under humidified condition for 48-72 hrs. The number of larvae that arrested as dauers  
951 (determined by phenotype and/or resistance to 1%SDS) and those that developed into L4s or  
952 adults were counted and percentage of dauers was calculated. The total number of embryos in  
953 each plate was ~50-100. Each experiment was performed in triplicate or more.

954

#### 955 **SDS treatment**

956 Larvae were washed off the dauer assay plates, washed 1X with PBS to remove bacteria, treated  
957 with 1% sodium dodecyl sulfate (SDS) for 30 minutes, washed again with M9, and then transferred

958 onto a fresh plate. Larvae could be scored easily as dead/dissolved or as live dauer larvae (based  
959 on their phenotype, and movement).

960

#### 961 **RNAi mediated downregulation of genes**

962 All RNAi clones used were verified by sequencing, and plates were seeded with RNAi bacteria  
963 for a maximum of two days before being used. Day-one gravid adults grown on OP50 were  
964 allowed to lay eggs on RNAi-bacteria seeded plates for 2-4 hours at 20°C. The adults were then  
965 removed, and the embryos were transferred to 25°C (or kept at 20°C) under humidified condition  
966 for 48-72 hrs. The number of larvae that arrested as dauers (determined by phenotype and/or  
967 resistance to 1%SDS) and those that developed into L4s or adults were counted and  
968 percentage of dauers was calculated.

969

#### 970 **Exposure to food [OP50] availability**

971 Gravid day-one *ilc-17.1*(*pra03 [ilc-17.1::SL2::mCherry]*) X adults or *ilc-17.1*(*pra04 [ilc-*  
972 *17.1::3xHA]*) X adults were bleach dissolved and embryos were placed either on empty plates  
973 with no food or NGM plates seeded with OP50 and allowed to grow for 24-36 hours at 25°C. To  
974 observe mRNA expression of *ilc-17.1*, *ilc-17.1*(*pra03 [ilc-17.1::SL2::mCherry]*) X larvae were  
975 anesthetized with 1mM levamisole, mounted on 1% agarose pads, and imaged using a  
976 Confocal SPE microscope using optimal settings. mCherry expression served to mark cells that  
977 expressed *ilc-17.1* mRNA. To identify where ILC-17.1 protein was expressed prior to food  
978 exposure, and after food exposure, 24-36 hour *ilc-17.1*(*pra04 [ilc-17.1::3xHA]*) X larvae were  
979 fixed and immunostained using Bouin's Tube Fixation method (see below).

980

#### 981 **Immunofluorescence**

982 Nematodes were fixed and immunostained using a modification of the Bouin's Tube Fixation  
983 method<sup>104</sup>. Worms were fixed for 30 min. at room temperature (RT) in 400 µl Bouin's fix (Sigma

984 Aldrich) + 600  $\mu$ l methanol and 10  $\mu$ l  $\beta$ -mercaptoethanol by tumbling, freeze cracked three times  
985 in liquid nitrogen and again tumbled for 30 mins at RT. For permeabilization, the fixative was  
986 removed and exchanged for borate-Triton- $\beta$ mercaptoethanol (BTB: 1xBorate Buffer, 0.5% Triton  
987 and 2%  $\beta$ -mercaptoethanol) solution. Worms were tumbled 3 times for 1 hour each in fresh BTB  
988 solution at RT. Worms were washed with PBS-0.05% Tween and incubated in block-solution  
989 (5% BSA). Staining with primary antibody was performed overnight at 4 °C, incubation with  
990 secondary antibody (Donkey anti-Mouse Alexa Fluor 488, 1:2000) for 2-4 hours at RT. All  
991 antibody dilutions were performed using antibody buffer containing 5% BSA. Samples were  
992 mounted onto glass slides using VECTASHIELD antifade mounting medium (Vector  
993 Laboratories, Burlingame, CA, USA).

994 Primary antibodies used: (i) Monoclonal ANTI-FLAG M2, Sigma Aldrich, 1:500, (ii) Mouse anti-  
995 HA antibody, Thermofisher; 2-2.2.14, at 1:1000), (iii) anti  $\beta$ -Actin, Cell Signaling  
996 Technology, #4967, 1:1000.

997

### 998 **Chemotaxis**

999 Chemotaxis assay was performed on 9 cm petri dishes containing NGM. Two marks were made  
1000 on the back of the plate at opposite sides of the plate about 0.5 cm from the edge of the agar.  
1001 About 5  $\mu$ l of attractant diluted in water was placed on the agar over one mark, and 5  $\mu$ l of water  
1002 was placed as the control over the opposite mark. Attractants and concentrations used are  
1003 listed in drugs and metabolites section. 5  $\mu$ l sodium azide with the concentration of 1M was also  
1004 placed at both the attractant source and the control source. This drug could anesthetize animals  
1005 within about a 0.5-cm radius of the attractant. Age synchronized day-one adult worms were  
1006 transferred to the middle of the NGM plates at a point equidistant from the middle of each  
1007 odorant. After 1 hr., the assay was quantified by counting the number of worms that had left the  
1008 center origin a chemotaxis index was calculated  $[\#Odor - \#Control] / [\#Odor + \#Control]$ . Each  
1009 repeat consisted of 50 worms, and experiments were repeated a minimum of three times.

1010

### 1011 **Measuring Pharyngeal pumping**

1012 Synchronized day-one adults were singled onto NGM plates seeded with OP50, and onto plates  
1013 without OP50. Pharyngeal pumping rates were determined by recording the pharyngeal region of  
1014 animals by video using a Leica S9i digital stereo microscope at 5X magnification and slowing  
1015 down the video to manually count the number of 'pumps' in 10 seconds, three times per animal.  
1016 The mean of these pumps was determined and the number of pumps/minute calculated. One  
1017 complete cycle of synchronous contraction and relaxation of the corpus and the terminal bulb was  
1018 counted as a pump.

1019

### 1020 **Feeding of fluorescent latex beads**

1021 Overnight 5ml OP50 culture LB was pelleted and resuspended in fresh 0.5ml LB to concentrate  
1022 bacteria. 1  $\mu$ l of fluorescent beads of 0.5 $\mu$ m mean particle size that mimic size of *E. coli*. (Sigma  
1023 L3280, red fluorescence) was added to 1 ml of concentrated OP50 [1:1000 ratio (v/v)], and 100 $\mu$ l  
1024 of the mixture was seeded onto NGM plates<sup>105</sup>. Synchronized day-one adults were allowed to lay  
1025 eggs on the bead containing plates for 2 hours at 20°C and then removed. After 40 hours, larvae  
1026 were picked onto 1% agarose pads on glass slides and anesthetized using 10mM levamisole. Z-  
1027 stack images of the larvae were taken on Leica TCS SPE confocal microscope and number of  
1028 beads within a set area near the tail region per larvae was quantified.

1029

### 1030 **Fluorescence Image analysis**

1031 ImageJ (Fiji) v1.53i was used for measuring fluorescence intensity as follows: single planes [,  
1032 DAF-16::GFP, CEP-1::GFP, TG12] or projections of z-planes [DAF-28, INS-4, fluorescent latex  
1033 beads] were used for measuring fluorescence intensity. The region of interest was circled using  
1034 the circle selection tool. The mean fluorescence intensity of each circled area was recorded using



1035 the measurement tool. When appropriate, the background fluorescence intensity was measured  
1036 and subtracted. Quantification of measurements was done in Microsoft excel/GraphPad.

1037

### 1038 **Drug and metabolite treatment**

1039 The following drugs or metabolites were used:

| Drug/metabolite   | Source                          | Final concentration |
|-------------------|---------------------------------|---------------------|
| Glucose           | Research products International | 50/100mM            |
| 2-Deoxy-d-glucose | R&D systems                     | 50mM                |
| Mitotempo         | Millipore sigma                 | 0.1mM               |
| L-Glutamine       | Sigma-Aldrich                   | 0.26mM              |
| Skim Milk powder  | HyVee - instant nonfat dry milk | 20mM                |
| Diacetyl          | Sigma-Aldrich                   | 0.01% v/v           |
| Lysine            | Sigma-Aldrich                   | 1M                  |

1040

1041 The drug solution (0.5 ml) was spread onto NGM agar plates containing an OP50 lawn and left  
1042 for 1 hr. to dry or used for chemotaxis assays as described. Age synchronized day-one adult  
1043 worms were transferred to the middle of the NGM plates for 4 hrs. and dauer assay were  
1044 performed as described. Sterile water was used as control

1045

### 1046 **RNA-sequencing and Data analysis**

#### 1047 **a) RNA isolation, library preparation and sequencing**

1048 Day-one adult worms were bleach-hatched and ~3200 eggs/genotype (~800 eggs/plate  
1049 and 4 plates/genotype) were seeded on fresh OP50 plates and allowed to grow for 30-34  
1050 hrs. at 25°C. Worms were washed with sterile water and total RNA was extracted from

1051 biological triplicates using the Direct-zol RNA Miniprep Kits (catalog no. R2050, Zymo  
1052 Research). Libraries were prepared using the Illumina Stranded Total RNA Prep  
1053 with Ribo-Zero Plus, for rRNA depletion (catalog no. 20040525, Illumina). Samples  
1054 were sequenced in one lane of the Illumina NovaSeq 6000, generating 2x150bp paired-  
1055 end reads.

1056

## 1057 **b) RNA-seq analysis**

1058 The quality of the RNA sequences was assessed with FastQC. Adapters and sequence  
1059 reads with a quality lower than Q25 were trimmed by using Trimgalore<sup>106</sup>(v0.67).  
1060 Ribosomal RNA (rRNA) contamination was filtered with sortmeRNA<sup>107</sup> (version 4.3.4).  
1061 Sequencing reads were aligned to the *C. elegans* genome (WBcel235<sup>108</sup>) using the Star  
1062 aligner<sup>109</sup> (v2.7.9a) and then the aligned reads were quantified with FeatureCounts  
1063 v2.0.1 from the R package Rsubread<sup>110</sup>. Differential expression analysis was performed  
1064 using DESeq2<sup>111</sup> and genes with FDR corrected p-value of < 0.05 were considered  
1065 significant. Pairwise distance analysis (sample-to-sample) was performed by using  
1066 normalized counts coupled with the variance stabilization transformation (VST) on the  
1067 complete set of genes and calculating the Euclidean distance between the replicates.  
1068 The microarray data for the *C. elegans* dauer stage was obtained from the  
1069 Supplementary Table 1 of the study by Wang, J. & Kim (2003)<sup>32</sup>. The expression values  
1070 of the dauer stage were defined as the dauers expression (fold-change) at 0hr relative to  
1071 the mixed staged reference RNA. Sequences IDs from the array were converted to  
1072 standard gene nomenclature using Simplemine in Wormbase<sup>112</sup>. The correlation  
1073 between the expression at the dauer stage and the fold change in expression in the *ilc-*  
1074 *17.1* deletion mutant relative to the wild type, was determined by performing a Spearman

1075 Rank Test. The correlation test was performed in all genes present in both datasets and  
1076 in a subset of the genes identified as collagens.

### 1077 **c) Functional analysis**

1078 Gene ontology analysis (GO) and KEGG enrichment analysis was performed on the  
1079 differentially expressed genes by using ClusterProfiler 4.0<sup>113</sup>. Terms with an FDR  
1080 corrected p-value <0.05 were considered significant. The annotations were obtained  
1081 from R package org.Ce.eg.db<sup>114</sup> (version 3.14) and the KEGG database<sup>115</sup>. The  
1082 annotations of genes as part of the metabolic pathways were obtained from the  
1083 database Wormpaths<sup>91</sup> and Heatmaps were done using the package  
1084 Complexheatmap<sup>116</sup>.

1085

### 1086 **Progenitor blast cell (P cells) imaging and quantification.**

1087 Synchronized day-one adults were allowed to lay eggs on OP50 plates for 2 hours at 20°C and  
1088 then removed. The plates were then placed at 25°C. After 15 hours, about 10 L1 larvae were  
1089 picked onto 1% agarose pads on glass slides and anesthetized using 10mM levamisole. The  
1090 brightest Z-plane showing P cells was imaged on Leica TCS SPE confocal microscope. Mean  
1091 fluorescence of the first four visible P cells was averaged in each L1 larva.

1092

### 1093 **DiO dye filling assay to identify amphid neurons**

1094 A stock dye solution containing 2mg/ml DiO (Molecular Probes, catalog # D-275) in dimethyl  
1095 formamide is made and maintained under dark conditions. Day-one adult worms were  
1096 transferred into an eppendorf tube with 1 ml of M9, spun down at 2000-3000 rpm and  
1097 supernatant removed. Worms were resuspended in 1 ml of M9 and 5 microliter DiO stock sol  
1098 (1:200 dilution) was added and incubated on a slow shaker for 2 hours at room temperature.  
1099 Worms were spun down and washed with M9 twice before transferring them onto agar pads  
1100 with 1mM levamisole to visualize by fluorescence using a Leica TCS SPE confocal microscope.

1101

1102 **Dauer pharyngeal pumping**

1103 Synchronized day-one adults were allowed to lay eggs on OP50 plates for 2 hours at 20°C and  
1104 then removed. The plates were then placed at 25°C, and larvae were allowed to arrest as dauers  
1105 or grow into L4 larvae (RNAi treatment). On day 3, larvae that remained arrested as dauers were  
1106 used to measure pharyngeal pumping rates using Zeiss Axio Observer.A1 at 40X magnification.  
1107 Pumping rates were measured by counting the number of grinder movements in the terminal bulb  
1108 per minute. The average of three biological replicates consisting of 10 dauer larvae each was  
1109 quantified.

1110

1111 **Scoring apoptotic nuclei with Acridine Orange**

1112 Acridine orange (AO) staining was performed as previously described (Hefel et al. 2021). AO  
1113 staining to detect apoptotic germline cells was performed by picking 50 L4 animals to a fresh  
1114 plate and allowing them to grow into day-one adults for 24 hours at 20°C prior to staining. For  
1115 each trial, 10 mg/ml AO stain was freshly prepared and then diluted 1:400 with M9 buffer.  
1116 Worms were then picked to a tube of the diluted AO stain, wrapped tightly with foil, and rotated  
1117 at room temperature for 2 hours. After mixing, worms were transferred to a fresh OP50 plate  
1118 and allowed to crawl away from residual AO stain before being picked to a droplet of 10 mM  
1119 levamisole on a 1% agarose pad. A cover slip was added, and worms were imaged immediately  
1120 using the Leica fluorescence microscope on 60x magnification. It was important to visualize AO  
1121 within 10 mins after mounting animals on the pad. The number of AO stain positive cells found  
1122 in 12 individual gonad arms per experiment were recorded for each sample.

1123

1124 **Gamma irradiating *C. elegans* to activate CEP-1/p53**

1125 100 L4 larvae were picked onto an OP50 seeded plate, allowed to mature into day-one adults  
1126 and exposed to 75 Gy gamma irradiation, and subsequently harvested for Western blot

1127 analysis. To determine the number of AO positive apoptotic nuclei, at least 50 L4 larvae were  
1128 exposed to 75 Gy gamma irradiation. The number of AO positive cells were scored 24 hrs. later,  
1129 when animals had matured into day-one adults.

1130

## 1131 **Western blot analysis**

### 1132 **i. Western blot analysis of *C. elegans***

1133 Western blot analysis was performed with 30–100 adult day-one animals, or approximately 400  
1134 30-36 hr. larvae as indicated. Animals were harvested in 15  $\mu$ l of 1X PBS (pH 7.4), and 4X  
1135 Laemmli sample buffer (catalog no. 1610737, Bio-Rad) supplemented with 10%  $\beta$ -  
1136 mercaptoethanol was added and samples were boiled for 30 min. Whole-worm lysates were  
1137 resolved on 12% SDS-PAGE gels and transferred onto nitrocellulose membrane (catalog no.  
1138 1620115, Bio-Rad). Membranes were blocked with Odyssey Blocking Buffer (part no. 927–50000,  
1139 LI-COR). Immunoblots were imaged using LI-COR Odyssey Infrared Imaging System (LI-COR  
1140 Biotechnology, Lincoln, NE). Mouse anti-FLAG M2 antibody (catalog no. F1804,  
1141 RRID:AB\_262044, Sigma Aldrich) was used at 1:500 to detect CEP-1::FLAG. Mouse anti-HA  
1142 antibody (ThermoFisher; 2-2.2.14), was used at 1:1000 to detect ILC-17.1::HA. Rabbit monoclonal  
1143 Phospho-AMPK $\alpha$  (Thr172) (D79.5E) (Cell Signaling Technology, #4188) was used at 1:1000 to  
1144 detect active AMPK. Rabbit CeHIF-1 antibody at (1:5,000) was a kind gift from Dr. Peter Ratcliffe,  
1145 Oxford. Mouse anti- $\alpha$ -tubulin primary antibody (AA4.3, RRID:AB\_579793), developed by C.  
1146 Walsh, was obtained from the Developmental Studies Hybridoma Bank (DSHB), created by the  
1147 National Institute of Child Health and Human Development (NICHD) of the National Institute of  
1148 Health (NIH), and maintained at the Department of Biology, University of Iowa. The following  
1149 secondary antibodies were used: Donkey anti-mouse IgG (H and L) Antibody IRDye 800CW  
1150 Conjugated (Licor) and Alexa Fluor 680 goat anti-rabbit IgG (H+L) (Invitrogen). LI-COR Image  
1151 Studio software (RRID:SCR\_015795) was used to quantify protein levels in different samples,

1152 relative to  $\alpha$ -tubulin levels. Fold change of protein levels was calculated relative to wildtype (N2)/  
1153 controls.

1154 **ii. Western blot analysis of epithelial cell lines**

1155 A549 epithelial cells were lysed in a modified M2 buffer containing 20mM  
1156 tris[hydroxymethyl]aminomethane, 150mM NaCl at pH 7.4, 0.5% NP40, 3mM EDTA, 3mM  
1157 EGTA, 4mM PMSF, and a cOmplete Mini, EDTA-free protease inhibitor tablet according to the  
1158 manufacturer's instructions (Roche, #11836170001). Epithelial cells were collected by  
1159 mechanical dislodgment in lysis buffer at individual time points, incubated for 20 minutes on ice,  
1160 and spun at 14,000 x g for 5 minutes to remove insoluble material. 25ug protein was resolved  
1161 by NuPAGE™ 4-12% Bis-Tris gel (Invitrogen) and transferred to PVDF for immunoblotting. Anti-  
1162 p53 (Cell Signaling Technology, #9282) and  $\beta$ -actin (DSHB, 224-236-1) primary antibodies were  
1163 used with HRP-conjugated secondary antibodies to anti-rabbit IgG (Jackson ImmunoResearch,  
1164 #111-035-003) and anti-mouse IgG (Invitrogen, #62-6520). Densitometry was analyzed with  
1165 ImageJ software.

1166

1167 **RNA extraction and real-time quantitative reverse-transcriptase PCR (RT-PCR)**

1168 Worms were bleach-hatched as described above and ~400-800 eggs/plate (2 plates/strain) were  
1169 seeded on fresh OP50 plates and were allowed to grow (i) for 30-34 hrs. at 25°C or (ii) for 36 hrs.  
1170 at 20°C and then harvested for RNA extraction. RNA was extracted as described earlier <sup>117</sup>.  
1171 Briefly, plates were washed with sterile water and centrifuged. Water was carefully removed and  
1172 300  $\mu$ l of Trizol (catalog no. 400753, Life Technologies) was added and snap-frozen immediately  
1173 in liquid nitrogen. Samples were thawed on ice and then lysed using a Precellys 24 homogenizer  
1174 (Bertin Corp.). RNA was then purified as detailed with appropriate volumes of reagents modified  
1175 to 300  $\mu$ l of Trizol. The RNA pellet was dissolved in 17  $\mu$ l of RNase-free water. The purified RNA  
1176 was then treated with deoxyribonuclease using the TURBO DNA-free kit (catalog no. AM1907,  
1177 Life Technologies) as per the manufacturer's protocol. cDNA was generated by using the iScript

1178 cDNA Synthesis Kit (catalog no. 170–8891, Bio-Rad). qRT-PCR was performed using PowerUp  
 1179 SYBR Green Master Mix (catalog no. A25742, Thermo Fisher Scientific) in QuantStudio 3 Real-  
 1180 Time PCR System (Thermo Fisher Scientific) at a 10  $\mu$ l sample volume, in a 96-well plate (catalog  
 1181 no. 4346907, Thermo Fisher Scientific). The relative amounts of mRNA were determined using  
 1182 the  $\Delta\Delta C_t$  method for quantitation. We selected *pmp-3* as an appropriate internal control for gene  
 1183 expression analysis in *C. elegans*.

1184

1185 All relative changes of mRNA were normalized to either that of the wild-type control or the control  
 1186 for each genotype (specified in figure legends). Each experiment was repeated a minimum of  
 1187 three times. For qPCR reactions, the amplification of a single product with no primer dimers was  
 1188 confirmed by melt-curve analysis performed at the end of the reaction. Primers were designed  
 1189 using Primer3 software and generated by Integrated DNA Technologies. The primers used for  
 1190 the qRT-PCR analysis are listed below:

| Gene                      | Forward primer (5'-3')   | Reverse primer (5'-3')   |
|---------------------------|--------------------------|--------------------------|
| <i>pfk-1.2</i>            | TTGCATCGAATCTGTGAAGC     | TCGCTGCAGTCAAAGCTAGA     |
| <i>cyc-2.2</i>            | CGGTGGAGCTATTCCAGAAG     | GCAACTTGTCCGGATTGTCT     |
| <i>egl-1</i>              | TCCAAGCTAGCAGCAATGTG     | GCGAAAAAGTCCAGAAGACG     |
| <i>ced-13</i>             | GCAACTCAAACACCGTTGAA     | CAATGCTGGCATACTGCTTG     |
| <i>phg-1</i>              | CAGAGGAGCTTGTACCGACA     | TCGTCTCTAGCAGTGCATGT     |
| <i>sod-3</i>              | CACTGCTTCAAAGCTTGTTC     | ATGGGAGATCTGGGAGAGTG     |
| <i>mtl-1</i>              | TGGATGTAAGGGAGACTGCAA    | CATTTTAATGAGCCGCAGCA     |
| <i>lys-7</i>              | GCCGTCAAACCTTGGCATCTT    | GGGTTGTATGCACGAACGAA     |
| <i>pmp-3</i>              | TAGAGTCAAGGGTCGCAGTG     | ATCGGCACCAAGGAACTGG      |
| <i>cep-1(a+b isoform)</i> | GCTCACTCTGTGCGACTGCTGAGT | AACCCAAGTGTATCTGGGAACTTT |

|                         |                      |                         |
|-------------------------|----------------------|-------------------------|
| <i>cep-1(a isoform)</i> | GTTGTGCTCGACTCCCAAAG | GGCACGCTTCTCAATTACAAGTT |
|-------------------------|----------------------|-------------------------|

1191

1192 **Chromatin immunoprecipitation (ChIP)**

1193 Chromatin immunoprecipitation (ChIP) was performed as described earlier (Das et al., 2020).

1194 Day-one adult worms were bleach-hatched as described above and ~1600 eggs were seeded

1195 (~800 eggs/plate and 2 plates/genotype) on fresh OP50 plates. Plates were kept at 25°C for 30-

1196 34 hrs. and larvae were washed with 1X PBS (pH 7.4) and cross-linked with freshly prepared 2%

1197 formaldehyde (catalog no. 252549, Sigma Aldrich) at room temperature for 10 min followed by

1198 addition of 250 mM Tris (pH 7.4) at room temperature for 10 min. Samples were then washed

1199 three times in ice-cold 1X PBS supplemented with protease inhibitor cocktail and snap-frozen in

1200 liquid nitrogen. The worm pellet was resuspended in FA buffer [50 mM HEPES (pH 7.4), 150 mM

1201 NaCl, 50 mM EDTA, 1% Triton-X-100, 0.5% SDS and 0.1% sodium deoxycholate], supplemented

1202 with 1 mM DTT and protease inhibitor cocktail. The suspended worm pellet was lysed using a

1203 Precellys 24 homogenizer (Bertin Corp.), and then sonicated in a Bioruptor Pico Sonication

1204 System (catalog no. B0106001, Diagenode) (15 cycles of 30 s on/off).

1205 Endogenous CEP-1 was immunoprecipitated with anti-FLAG M2 magnetic bead (catalog no. M-

1206 8823, Sigma-Aldrich). Beads were first pre-cleared with salmon sperm DNA (catalog no. 15632–

1207 011, Invitrogen). Worm lysate was incubated at 4°C overnight with the pre-cleared FLAG beads.

1208 Beads were washed with low salt, high salt and LiCl wash buffers and then eluted in buffer

1209 containing EDTA, SDS and sodium bicarbonate. The elute was then de-crosslinked overnight in

1210 presence of Proteinase K. The DNA was purified by ChIP DNA purification kit (catalog no. D5205,

1211 Zymo Research). qPCR analysis of DNA was performed as described above using primer sets

1212 specific for different target genes. For all ChIP experiments, 10% of total lysate was used as ‘input’

1213 and chromatin immunoprecipitated by different antibodies were expressed as % input values. The

1214 primers used for ChIP experiments, and the expected amplicon sizes are as follows:



| Gene          | Position                       | Forward primer (5'-3')                 | Reverse primer (5'-3')             | Amplicon size |
|---------------|--------------------------------|----------------------------------------|------------------------------------|---------------|
| <i>egl-1</i>  | TSS<br>+4 to<br>+123)          | CTCACCTTTGCCTCAAC<br>CTC               | CGAGGAGAAGTCCTG<br>AGACG           | 120 bp        |
| <i>ced-13</i> | Promoter<br>(-428 to -<br>310) | CTATTCTTGGCCGTGCT<br>CAT               | AGGCAATCTAGCATG<br>CACCT           | 119 bp        |
| <i>phg-1</i>  | Promoter<br>-428 to -<br>294)  | GCCAAACCTTCCAGA<br>TTTACA              | TTCCTAGATAAGGGT<br>TAGATGATGAGA    | 135 bp        |
| <i>phg-1</i>  | Intron 1<br>(+223 to<br>+326)  | AAGCTGAGCTCCGAA<br>AACAA               | TTTCCCGCTAAACGA<br>GACAT           | 104 bp        |
| <i>cki-1</i>  | Promoter<br>(-698 to -<br>722) | TTT TCC ATA CTT CAC<br>TAG TCA AAA CCT | GAC AGT GAG AAG CTT<br>TCG TAT TGA | 103 bp        |
| <i>cki-1</i>  | Promoter<br>(-542 to -<br>428) | TTC CTC ATA ATC ACG<br>GAG CA          | GGA ACC GAA GTG<br>GTC AGA TG      | 114 bp        |
| <i>cki-1</i>  | Promoter<br>(-323 to -<br>217) | TCT CCG ACT GCT GAC<br>CT              | CGA GAA GGG GTG<br>GAG TCA TA      | 106 bp        |

1215

1216 **Treatment of mouse epithelial cell lines with human IL-17 and Nutlin3A**

1217 A549 epithelial cells were seeded in a 6-well plate overnight and stimulated with 50-100ng/mL  
1218 recombinant human-IL-17 (Peprotech, SKU 200-17) or 10uM Nutlin3A (Tocris, 675576-98-4),  
1219 and supernatants and cell lysates were harvested 18 hours later.

1220

## 1221 **QUANTIFICATION AND STATISTICAL ANALYSIS**

1222 Each 'experiment' refers to a biological repeat. No statistical methods were used to  
1223 predetermine sample size. The experiments were not randomized, but some were blinded. The  
1224 statistical details of experiments could be found in corresponding figure legends. The data were  
1225 analyzed by using Student's t-test and/or one-way ANOVA with Tukey's correction (GraphPad  
1226 Prism software) as described in respective figure legends. P values are indicated as follows:  
1227 \* $p < 0.05$ ; \*\* $p < 0.01$ ; \*\*\* $p < 0.001$ , ns, not significant.

1228 **References**

1229

1230 1 Cai, L. & Tu, B. P. Driving the cell cycle through metabolism. *Annu Rev Cell Dev Biol* **28**,  
1231 59-87, doi:10.1146/annurev-cellbio-092910-154010 (2012).

1232 2 Wang, A., Luan, H. H. & Medzhitov, R. An evolutionary perspective on  
1233 immunometabolism. *Science* **363**, doi:10.1126/science.aar3932 (2019).

1234 3 Lee, I. H. & Finkel, T. Metabolic regulation of the cell cycle. *Curr Opin Cell Biol* **25**, 724-  
1235 729, doi:10.1016/j.ceb.2013.07.002 (2013).

1236 4 Hall, P. A. & Lane, D. P. Tumor suppressors: a developing role for p53? *Curr Biol* **7**, R144-  
1237 147, doi:10.1016/s0960-9822(97)70074-5 (1997).

1238 5 Levine, A. J. p53: 800 million years of evolution and 40 years of discovery. *Nat Rev Cancer*  
1239 **20**, 471-480, doi:10.1038/s41568-020-0262-1 (2020).

1240 6 Zhu, J. & Thompson, C. B. Metabolic regulation of cell growth and proliferation. *Nat Rev*  
1241 *Mol Cell Biol* **20**, 436-450, doi:10.1038/s41580-019-0123-5 (2019).

1242 7 Altan-Bonnet, G. & Mukherjee, R. Cytokine-mediated communication: a quantitative  
1243 appraisal of immune complexity. *Nat Rev Immunol* **19**, 205-217, doi:10.1038/s41577-019-  
1244 0131-x (2019).

1245 8 Talbot, S., Foster, S. L. & Woolf, C. J. Neuroimmunity: Physiology and Pathology. *Annu*  
1246 *Rev Immunol* **34**, 421-447, doi:10.1146/annurev-immunol-041015-055340 (2016).

1247 9 Mills, K. H. G. IL-17 and IL-17-producing cells in protection versus pathology. *Nat Rev*  
1248 *Immunol*, doi:10.1038/s41577-022-00746-9 (2022).

1249 10 Li, X., Bechara, R., Zhao, J., McGeachy, M. J. & Gaffen, S. L. IL-17 receptor-based  
1250 signaling and implications for disease. *Nat Immunol* **20**, 1594-1602, doi:10.1038/s41590-  
1251 019-0514-y (2019).

1252 11 McGeachy, M. J., Cua, D. J. & Gaffen, S. L. The IL-17 Family of Cytokines in Health and  
1253 Disease. *Immunity* **50**, 892-906, doi:10.1016/j.immuni.2019.03.021 (2019).

- 1254 12 Choi, G. B. *et al.* The maternal interleukin-17a pathway in mice promotes autism-like  
1255 phenotypes in offspring. *Science* **351**, 933-939, doi:10.1126/science.aad0314 (2016).
- 1256 13 Reed, M. D. *et al.* IL-17a promotes sociability in mouse models of neurodevelopmental  
1257 disorders. *Nature* **577**, 249-253, doi:10.1038/s41586-019-1843-6 (2020).
- 1258 14 Chen, C. *et al.* IL-17 is a neuromodulator of *Caenorhabditis elegans* sensory responses.  
1259 *Nature* **542**, 43-48, doi:10.1038/nature20818 (2017).
- 1260 15 Flynn, S. M. *et al.* MALT-1 mediates IL-17 neural signaling to regulate *C. elegans* behavior,  
1261 immunity and longevity. *Nat Commun* **11**, 2099, doi:10.1038/s41467-020-15872-y (2020).
- 1262 16 Lillis, M., Zaccardi, N. J. & Heiman, M. G. Axon-dendrite and apical-basolateral sorting in  
1263 a single neuron. *Genetics* **221**, doi:10.1093/genetics/iyac036 (2022).
- 1264 17 Low, I. I. C. *et al.* Morphogenesis of neurons and glia within an epithelium. *Development*  
1265 **146**, doi:10.1242/dev.171124 (2019).
- 1266 18 Jain, A. K. & Barton, M. C. p53: emerging roles in stem cells, development and beyond.  
1267 *Development* **145**, doi:10.1242/dev.158360 (2018).
- 1268 19 Rutkowski, R., Hofmann, K. & Gartner, A. Phylogeny and function of the invertebrate p53  
1269 superfamily. *Cold Spring Harb Perspect Biol* **2**, a001131,  
1270 doi:10.1101/cshperspect.a001131 (2010).
- 1271 20 Bowling, S. *et al.* P53 and mTOR signalling determine fitness selection through cell  
1272 competition during early mouse embryonic development. *Nat Commun* **9**, 1763,  
1273 doi:10.1038/s41467-018-04167-y (2018).
- 1274 21 Zhang, G. *et al.* p53 pathway is involved in cell competition during mouse embryogenesis.  
1275 *Proc Natl Acad Sci U S A* **114**, 498-503, doi:10.1073/pnas.1617414114 (2017).
- 1276 22 Hong, H. *et al.* Suppression of induced pluripotent stem cell generation by the p53-p21  
1277 pathway. *Nature* **460**, 1132-1135, doi:10.1038/nature08235 (2009).
- 1278 23 Liu, Y., Hoya-Arias, R. & Nimer, S. D. The role of p53 in limiting somatic cell  
1279 reprogramming. *Cell Res* **19**, 1227-1228, doi:10.1038/cr.2009.121 (2009).

- 1280 24 Lu, W. J., Amatruda, J. F. & Abrams, J. M. p53 ancestry: gazing through an evolutionary  
1281 lens. *Nat Rev Cancer* **9**, 758-762, doi:10.1038/nrc2732 (2009).
- 1282 25 Hu, P. J. Dauer. *WormBook*, 1-19, doi:10.1895/wormbook.1.144.1 (2007).
- 1283 26 Karp, X. Working with dauer larvae. *WormBook* **2018**, 1-19,  
1284 doi:10.1895/wormbook.1.180.1 (2018).
- 1285 27 Ewald, C. Y., Landis, J. N., Porter Abate, J., Murphy, C. T. & Blackwell, T. K. Dauer-  
1286 independent insulin/IGF-1-signalling implicates collagen remodelling in longevity. *Nature*  
1287 **519**, 97-101, doi:10.1038/nature14021 (2015).
- 1288 28 Burnell, A. M., Houthoofd, K., O'Hanlon, K. & Vanfleteren, J. R. Alternate metabolism  
1289 during the dauer stage of the nematode *Caenorhabditis elegans*. *Exp Gerontol* **40**, 850-  
1290 856, doi:10.1016/j.exger.2005.09.006 (2005).
- 1291 29 Holt, S. J. Staying alive in adversity: transcriptome dynamics in the stress-resistant dauer  
1292 larva. *Funct Integr Genomics* **6**, 285-299, doi:10.1007/s10142-006-0024-5 (2006).
- 1293 30 Lee, J. S. *et al.* FMRFamide-like peptides expand the behavioral repertoire of a densely  
1294 connected nervous system. *Proc Natl Acad Sci U S A* **114**, E10726-E10735,  
1295 doi:10.1073/pnas.1710374114 (2017).
- 1296 31 Schaedel, O. N., Gerisch, B., Antebi, A. & Sternberg, P. W. Hormonal signal amplification  
1297 mediates environmental conditions during development and controls an irreversible  
1298 commitment to adulthood. *PLoS Biol* **10**, e1001306, doi:10.1371/journal.pbio.1001306  
1299 (2012).
- 1300 32 Wang, J. & Kim, S. K. Global analysis of dauer gene expression in *Caenorhabditis*  
1301 *elegans*. *Development* **130**, 1621-1634, doi:10.1242/dev.00363 (2003).
- 1302 33 Wirick, M. J. *et al.* daf-16/FOXO blocks adult cell fate in *Caenorhabditis elegans* dauer  
1303 larvae via lin-41/TRIM71. *PLoS Genet* **17**, e1009881, doi:10.1371/journal.pgen.1009881  
1304 (2021).

- 1305 34 Alcantar-Fernandez, J., Navarro, R. E., Salazar-Martinez, A. M., Perez-Andrade, M. E. &  
1306 Miranda-Rios, J. Caenorhabditis elegans respond to high-glucose diets through a network  
1307 of stress-responsive transcription factors. *PLoS One* **13**, e0199888,  
1308 doi:10.1371/journal.pone.0199888 (2018).
- 1309 35 Franco-Juarez, B. *et al.* Effects of High Dietary Carbohydrate and Lipid Intake on the  
1310 Lifespan of *C. elegans*. *Cells* **10**, doi:10.3390/cells10092359 (2021).
- 1311 36 Garcia, A. M. *et al.* Glucose induces sensitivity to oxygen deprivation and modulates  
1312 insulin/IGF-1 signaling and lipid biosynthesis in *Caenorhabditis elegans*. *Genetics* **200**,  
1313 167-184, doi:10.1534/genetics.115.174631 (2015).
- 1314 37 Missios, P. *et al.* Glucose substitution prolongs maintenance of energy homeostasis and  
1315 lifespan of telomere dysfunctional mice. *Nat Commun* **5**, 4924, doi:10.1038/ncomms5924  
1316 (2014).
- 1317 38 Mondoux, M. A. *et al.* O-linked-N-acetylglucosamine cycling and insulin signaling are  
1318 required for the glucose stress response in *Caenorhabditis elegans*. *Genetics* **188**, 369-  
1319 382, doi:10.1534/genetics.111.126490 (2011).
- 1320 39 Schlotterer, A. *et al.* *C. elegans* as model for the study of high glucose- mediated life span  
1321 reduction. *Diabetes* **58**, 2450-2456, doi:10.2337/db09-0567 (2009).
- 1322 40 Zarse, K. *et al.* Impaired insulin/IGF1 signaling extends life span by promoting  
1323 mitochondrial L-proline catabolism to induce a transient ROS signal. *Cell Metab* **15**, 451-  
1324 465, doi:10.1016/j.cmet.2012.02.013 (2012).
- 1325 41 Wu, Z. *et al.* Dietary Restriction Extends Lifespan through Metabolic Regulation of Innate  
1326 Immunity. *Cell Metab* **29**, 1192-1205 e1198, doi:10.1016/j.cmet.2019.02.013 (2019).
- 1327 42 Feng, Y., Williams, B. G., Koumanov, F., Wolstenholme, A. J. & Holman, G. D. FGT-1 is  
1328 the major glucose transporter in *C. elegans* and is central to aging pathways. *Biochem J*  
1329 **456**, 219-229, doi:10.1042/BJ20131101 (2013).

- 1330 43 Kenyon, C., Chang, J., Gensch, E., Rudner, A. & Tabtiang, R. A C. elegans mutant that  
1331 lives twice as long as wild type. *Nature* **366**, 461-464, doi:10.1038/366461a0 (1993).
- 1332 44 Ogg, S. *et al.* The Fork head transcription factor DAF-16 transduces insulin-like metabolic  
1333 and longevity signals in C. elegans. *Nature* **389**, 994-999, doi:10.1038/40194 (1997).
- 1334 45 Henderson, S. T. & Johnson, T. E. daf-16 integrates developmental and environmental  
1335 inputs to mediate aging in the nematode *Caenorhabditis elegans*. *Curr Biol* **11**, 1975-1980,  
1336 doi:10.1016/s0960-9822(01)00594-2 (2001).
- 1337 46 Johnson, T. E. *et al.* Longevity genes in the nematode *Caenorhabditis elegans* also  
1338 mediate increased resistance to stress and prevent disease. *J Inherit Metab Dis* **25**, 197-  
1339 206, doi:10.1023/a:1015677828407 (2002).
- 1340 47 Tissenbaum, H. A. & Ruvkun, G. An insulin-like signaling pathway affects both longevity  
1341 and reproduction in *Caenorhabditis elegans*. *Genetics* **148**, 703-717,  
1342 doi:10.1093/genetics/148.2.703 (1998).
- 1343 48 Ritter, A. D. *et al.* Complex expression dynamics and robustness in C. elegans insulin  
1344 networks. *Genome Res* **23**, 954-965, doi:10.1101/gr.150466.112 (2013).
- 1345 49 Chen, Y. & Baugh, L. R. Ins-4 and daf-28 function redundantly to regulate C. elegans L1  
1346 arrest. *Dev Biol* **394**, 314-326, doi:10.1016/j.ydbio.2014.08.002 (2014).
- 1347 50 Pierce, S. B. *et al.* Regulation of DAF-2 receptor signaling by human insulin and ins-1, a  
1348 member of the unusually large and diverse C. elegans insulin gene family. *Genes Dev* **15**,  
1349 672-686, doi:10.1101/gad.867301 (2001).
- 1350 51 Brunton, J., Steele, S., Ziehr, B., Moorman, N. & Kawula, T. Feeding uninvited guests:  
1351 mTOR and AMPK set the table for intracellular pathogens. *PLoS Pathog* **9**, e1003552,  
1352 doi:10.1371/journal.ppat.1003552 (2013).
- 1353 52 Schulz, T. J. *et al.* Glucose restriction extends *Caenorhabditis elegans* life span by  
1354 inducing mitochondrial respiration and increasing oxidative stress. *Cell Metab* **6**, 280-293,  
1355 doi:10.1016/j.cmet.2007.08.011 (2007).

- 1356 53 Carman, L., Schuck, R. J., Li, E. & Nelson, M. D. An AMPK biosensor for *Caenorhabditis*  
1357 *elegans*. *MicroPubl Biol* **2022**, doi:10.17912/micropub.biology.000596 (2022).
- 1358 54 Zecic, A. & Braeckman, B. P. DAF-16/FoxO in *Caenorhabditis elegans* and Its Role in  
1359 Metabolic Remodeling. *Cells* **9**, doi:10.3390/cells9010109 (2020).
- 1360 55 Oh, S. W. *et al.* JNK regulates lifespan in *Caenorhabditis elegans* by modulating nuclear  
1361 translocation of forkhead transcription factor/DAF-16. *Proc Natl Acad Sci U S A* **102**, 4494-  
1362 4499, doi:10.1073/pnas.0500749102 (2005).
- 1363 56 Greer, E. L. *et al.* An AMPK-FOXO pathway mediates longevity induced by a novel method  
1364 of dietary restriction in *C. elegans*. *Curr Biol* **17**, 1646-1656,  
1365 doi:10.1016/j.cub.2007.08.047 (2007).
- 1366 57 Leiser, S. F., Begun, A. & Kaeberlein, M. HIF-1 modulates longevity and healthspan in a  
1367 temperature-dependent manner. *Aging Cell* **10**, 318-326, doi:10.1111/j.1474-  
1368 9726.2011.00672.x (2011).
- 1369 58 Chen, D., Thomas, E. L. & Kapahi, P. HIF-1 modulates dietary restriction-mediated  
1370 lifespan extension via IRE-1 in *Caenorhabditis elegans*. *PLoS Genet* **5**, e1000486,  
1371 doi:10.1371/journal.pgen.1000486 (2009).
- 1372 59 Paek, J. *et al.* Mitochondrial SKN-1/Nrf mediates a conserved starvation response. *Cell*  
1373 *Metab* **16**, 526-537, doi:10.1016/j.cmet.2012.09.007 (2012).
- 1374 60 Gurkar, A. U. *et al.* Dysregulation of DAF-16/FOXO3A-mediated stress responses  
1375 accelerates oxidative DNA damage induced aging. *Redox Biol* **18**, 191-199,  
1376 doi:10.1016/j.redox.2018.06.005 (2018).
- 1377 61 Perrin, A. J. *et al.* Noncanonical control of *C. elegans* germline apoptosis by the  
1378 insulin/IGF-1 and Ras/MAPK signaling pathways. *Cell Death Differ* **20**, 97-107,  
1379 doi:10.1038/cdd.2012.101 (2013).



- 1380 62 Quevedo, C., Kaplan, D. R. & Derry, W. B. AKT-1 regulates DNA-damage-induced  
1381 germline apoptosis in *C. elegans*. *Curr Biol* **17**, 286-292, doi:10.1016/j.cub.2006.12.038  
1382 (2007).
- 1383 63 Baruah, A. *et al.* CEP-1, the *Caenorhabditis elegans* p53 homolog, mediates opposing  
1384 longevity outcomes in mitochondrial electron transport chain mutants. *PLoS Genet* **10**,  
1385 e1004097, doi:10.1371/journal.pgen.1004097 (2014).
- 1386 64 Yanase, S., Suda, H., Yasuda, K. & Ishii, N. Impaired p53/CEP-1 is associated with  
1387 lifespan extension through an age-related imbalance in the energy metabolism of *C.*  
1388 *elegans*. *Genes Cells* **22**, 1004-1010, doi:10.1111/gtc.12540 (2017).
- 1389 65 Derry, W. B., Putzke, A. P. & Rothman, J. H. *Caenorhabditis elegans* p53: role in  
1390 apoptosis, meiosis, and stress resistance. *Science* **294**, 591-595,  
1391 doi:10.1126/science.1065486 (2001).
- 1392 66 Levi-Ferber, M. *et al.* It's all in your mind: determining germ cell fate by neuronal IRE-1 in  
1393 *C. elegans*. *PLoS Genet* **10**, e1004747, doi:10.1371/journal.pgen.1004747 (2014).
- 1394 67 Hicks, T. *et al.* R-loop-induced irreparable DNA damage evades checkpoint detection in  
1395 the *C. elegans* germline. *Nucleic Acids Res* **50**, 8041-8059, doi:10.1093/nar/gkac621  
1396 (2022).
- 1397 68 Schumacher, B. *et al.* Translational repression of *C. elegans* p53 by GLD-1 regulates DNA  
1398 damage-induced apoptosis. *Cell* **120**, 357-368, doi:10.1016/j.cell.2004.12.009 (2005).
- 1399 69 Arum, O. & Johnson, T. E. Reduced expression of the *Caenorhabditis elegans* p53  
1400 ortholog cep-1 results in increased longevity. *J Gerontol A Biol Sci Med Sci* **62**, 951-959,  
1401 doi:10.1093/gerona/62.9.951 (2007).
- 1402 70 Lee, C. C. *et al.* Mutation of a Nopp140 gene *dao-5* alters rDNA transcription and  
1403 increases germ cell apoptosis in *C. elegans*. *Cell Death Dis* **5**, e1158,  
1404 doi:10.1038/cddis.2014.114 (2014).

- 1405 71 Gartner, A., Boag, P. R. & Blackwell, T. K. Germline survival and apoptosis. *WormBook*,  
1406 1-20, doi:10.1895/wormbook.1.145.1 (2008).
- 1407 72 Greiss, S., Schumacher, B., Grandien, K., Rothblatt, J. & Gartner, A. Transcriptional  
1408 profiling in *C. elegans* suggests DNA damage dependent apoptosis as an ancient function  
1409 of the p53 family. *BMC Genomics* **9**, 334, doi:10.1186/1471-2164-9-334 (2008).
- 1410 73 Schumacher, B. *et al.* *C. elegans* ced-13 can promote apoptosis and is induced in  
1411 response to DNA damage. *Cell Death Differ* **12**, 153-161, doi:10.1038/sj.cdd.4401539  
1412 (2005).
- 1413 74 Schertel, C. & Conradt, B. *C. elegans* orthologs of components of the RB tumor  
1414 suppressor complex have distinct pro-apoptotic functions. *Development* **134**, 3691-3701,  
1415 doi:10.1242/dev.004606 (2007).
- 1416 75 Rasmussen, M. A. *et al.* Transient p53 suppression increases reprogramming of human  
1417 fibroblasts without affecting apoptosis and DNA damage. *Stem Cell Reports* **3**, 404-413,  
1418 doi:10.1016/j.stemcr.2014.07.006 (2014).
- 1419 76 Sendoel, A., Kohler, I., Fellmann, C., Lowe, S. W. & Hengartner, M. O. HIF-1 antagonizes  
1420 p53-mediated apoptosis through a secreted neuronal tyrosinase. *Nature* **465**, 577-583,  
1421 doi:10.1038/nature09141 (2010).
- 1422 77 Karp, X. & Greenwald, I. Control of cell-fate plasticity and maintenance of multipotency by  
1423 DAF-16/FoxO in quiescent *Caenorhabditis elegans*. *Proc Natl Acad Sci U S A* **110**, 2181-  
1424 2186, doi:10.1073/pnas.1222377110 (2013).
- 1425 78 Tenen, C. C. & Greenwald, I. Cell Non-autonomous Function of daf-18/PTEN in the  
1426 Somatic Gonad Coordinates Somatic Gonad and Germline Development in *C. elegans*  
1427 Dauer Larvae. *Curr Biol* **29**, 1064-1072 e1068, doi:10.1016/j.cub.2019.01.076 (2019).
- 1428 79 Hand, S. C., Denlinger, D. L., Podrabsky, J. E. & Roy, R. Mechanisms of animal diapause:  
1429 recent developments from nematodes, crustaceans, insects, and fish. *Am J Physiol Regul*  
1430 *Integr Comp Physiol* **310**, R1193-1211, doi:10.1152/ajpregu.00250.2015 (2016).

- 1431 80 Hong, Y., Roy, R. & Ambros, V. Developmental regulation of a cyclin-dependent kinase  
1432 inhibitor controls postembryonic cell cycle progression in *Caenorhabditis elegans*.  
1433 *Development* **125**, 3585-3597, doi:10.1242/dev.125.18.3585 (1998).
- 1434 81 Koreth, J. & van den Heuvel, S. Cell-cycle control in *Caenorhabditis elegans*: how the  
1435 worm moves from G1 to S. *Oncogene* **24**, 2756-2764, doi:10.1038/sj.onc.1208607 (2005).
- 1436 82 Liu, Y. *et al.* p53 regulates hematopoietic stem cell quiescence. *Cell Stem Cell* **4**, 37-48,  
1437 doi:10.1016/j.stem.2008.11.006 (2009).
- 1438 83 Cheung, T. H. & Rando, T. A. Molecular regulation of stem cell quiescence. *Nat Rev Mol*  
1439 *Cell Biol* **14**, 329-340, doi:10.1038/nrm3591 (2013).
- 1440 84 Vousden, K. H. & Ryan, K. M. p53 and metabolism. *Nat Rev Cancer* **9**, 691-700,  
1441 doi:10.1038/nrc2715 (2009).
- 1442 85 Roy, S. H. *et al.* A complex regulatory network coordinating cell cycles during *C. elegans*  
1443 development is revealed by a genome-wide RNAi screen. *G3 (Bethesda)* **4**, 795-804,  
1444 doi:10.1534/g3.114.010546 (2014).
- 1445 86 Derry, W. B. *et al.* Regulation of developmental rate and germ cell proliferation in  
1446 *Caenorhabditis elegans* by the p53 gene network. *Cell Death Differ* **14**, 662-670,  
1447 doi:10.1038/sj.cdd.4402075 (2007).
- 1448 87 Pinkston-Gosse, J. & Kenyon, C. DAF-16/FOXO targets genes that regulate tumor growth  
1449 in *Caenorhabditis elegans*. *Nat Genet* **39**, 1403-1409, doi:10.1038/ng.2007.1 (2007).
- 1450 88 Del Sal, G., Ruaro, M. E., Philipson, L. & Schneider, C. The growth arrest-specific gene,  
1451 *gas1*, is involved in growth suppression. *Cell* **70**, 595-607, doi:10.1016/0092-  
1452 8674(92)90429-g (1992).
- 1453 89 Del Sal, G. *et al.* Gas1-induced growth suppression requires a transactivation-  
1454 independent p53 function. *Mol Cell Biol* **15**, 7152-7160, doi:10.1128/MCB.15.12.7152  
1455 (1995).

- 1456 90 Segovia, J. & Zarco, N. Gas1 is a pleiotropic regulator of cellular functions: from embryonic  
1457 development to molecular actions in cancer gene therapy. *Mini Rev Med Chem* **14**, 1139-  
1458 1147, doi:10.2174/1389557514666141127142301 (2014).
- 1459 91 Walker, M. D. *et al.* WormPaths: Caenorhabditis elegans metabolic pathway annotation  
1460 and visualization. *Genetics* **219**, doi:10.1093/genetics/iyab089 (2021).
- 1461 92 Chen, K. *et al.* IL-17 Receptor Signaling in the Lung Epithelium Is Required for Mucosal  
1462 Chemokine Gradients and Pulmonary Host Defense against *K. pneumoniae*. *Cell Host*  
1463 *Microbe* **20**, 596-605, doi:10.1016/j.chom.2016.10.003 (2016).
- 1464 93 Jones, R. G. *et al.* AMP-activated protein kinase induces a p53-dependent metabolic  
1465 checkpoint. *Mol Cell* **18**, 283-293, doi:10.1016/j.molcel.2005.03.027 (2005).
- 1466 94 Das, S., Min, S. & Prahlad, V. Gene bookmarking by the heat shock transcription factor  
1467 programs the insulin-like signaling pathway. *Mol Cell* **81**, 4843-4860 e4848,  
1468 doi:10.1016/j.molcel.2021.09.022 (2021).
- 1469 95 Das, S. *et al.* Serotonin signaling by maternal neurons upon stress ensures progeny  
1470 survival. *Elife* **9**, doi:10.7554/eLife.55246 (2020).
- 1471 96 Tatum, M. C. *et al.* Neuronal serotonin release triggers the heat shock response in *C.*  
1472 *elegans* in the absence of temperature increase. *Curr Biol* **25**, 163-174,  
1473 doi:10.1016/j.cub.2014.11.040 (2015).
- 1474 97 Ooi, F. K. & Prahlad, V. Olfactory experience primes the heat shock transcription factor  
1475 HSF-1 to enhance the expression of molecular chaperones in *C. elegans*. *Sci Signal* **10**,  
1476 doi:10.1126/scisignal.aan4893 (2017).
- 1477 98 Venkatesh, H. & Monje, M. Neuronal Activity in Ontogeny and Oncology. *Trends Cancer*  
1478 **3**, 89-112, doi:10.1016/j.trecan.2016.12.008 (2017).
- 1479 99 Curry, R. N. & Glasgow, S. M. The Role of Neurodevelopmental Pathways in Brain  
1480 Tumors. *Front Cell Dev Biol* **9**, 659055, doi:10.3389/fcell.2021.659055 (2021).

- 1481 100 Cully, M. Cancer: Targeting IL-17 in pancreatic cancer. *Nat Rev Drug Discov* **13**, 493,  
1482 doi:10.1038/nrd4372 (2014).
- 1483 101 Philip, M., Rowley, D. A. & Schreiber, H. Inflammation as a tumor promoter in cancer  
1484 induction. *Semin Cancer Biol* **14**, 433-439, doi:10.1016/j.semcancer.2004.06.006 (2004).
- 1485 102 Bordon, Y. Signalling: a new master to rival NF-kappaB? *Nat Rev Immunol* **14**, 432,  
1486 doi:10.1038/nri3708 (2014).
- 1487 103 Gibson, D. G. *et al.* Enzymatic assembly of DNA molecules up to several hundred  
1488 kilobases. *Nat Methods* **6**, 343-345, doi:10.1038/nmeth.1318 (2009).
- 1489 104 Nonet, M. L. *et al.* *Caenorhabditis elegans* rab-3 mutant synapses exhibit impaired  
1490 function and are partially depleted of vesicles. *J Neurosci* **17**, 8061-8073 (1997).
- 1491 105 Nika, L., Gibson, T., Konkus, R. & Karp, X. Fluorescent Beads Are a Versatile Tool for  
1492 Staging *Caenorhabditis elegans* in Different Life Histories. *G3 (Bethesda)* **6**, 1923-1933,  
1493 doi:10.1534/g3.116.030163 (2016).
- 1494 106 Krueger, F. (2021).
- 1495 107 Kopylova, E., Noe, L. & Touzet, H. SortMeRNA: fast and accurate filtering of ribosomal  
1496 RNAs in metatranscriptomic data. *Bioinformatics* **28**, 3211-3217,  
1497 doi:10.1093/bioinformatics/bts611 (2012).
- 1498 108 Yates, A. D. *et al.* Ensembl Genomes 2022: an expanding genome resource for non-  
1499 vertebrates. *Nucleic Acids Res* **50**, D996-D1003, doi:10.1093/nar/gkab1007 (2022).
- 1500 109 Dobin, A. *et al.* STAR: ultrafast universal RNA-seq aligner. *Bioinformatics* **29**, 15-21,  
1501 doi:10.1093/bioinformatics/bts635 (2013).
- 1502 110 Liao, Y., Smyth, G. K. & Shi, W. The R package Rsubread is easier, faster, cheaper and  
1503 better for alignment and quantification of RNA sequencing reads. *Nucleic Acids Research*  
1504 **47**, e47-e47, doi:10.1093/nar/gkz114 (2019).

- 1505 111 Love, M. I., Huber, W. & Anders, S. Moderated estimation of fold change and dispersion  
1506 for RNA-seq data with DESeq2. *Genome Biol* **15**, 550, doi:10.1186/s13059-014-0550-8  
1507 (2014).
- 1508 112 Davis, P. *et al.* WormBase in 2022-data, processes, and tools for analyzing  
1509 Caenorhabditis elegans. *Genetics* **220**, doi:10.1093/genetics/iyac003 (2022).
- 1510 113 Wu, T. *et al.* clusterProfiler 4.0: A universal enrichment tool for interpreting omics data.  
1511 *Innovation (N Y)* **2**, 100141, doi:10.1016/j.xinn.2021.100141 (2021).
- 1512 114 Carlson, M. (2019).
- 1513 115 Kanehisa, M., Furumichi, M., Sato, Y., Kawashima, M. & Ishiguro-Watanabe, M. KEGG  
1514 for taxonomy-based analysis of pathways and genomes. *Nucleic Acids Res*,  
1515 doi:10.1093/nar/gkac963 (2022).
- 1516 116 Gu, Z. Complex heatmap visualization. *iMeta* **1**, e43, doi:<https://doi.org/10.1002/imt2.43>  
1517 (2022).
- 1518 117 Chikka, M. R., Anbalagan, C., Dvorak, K., Dombeck, K. & Prahlad, V. The Mitochondria-  
1519 Regulated Immune Pathway Activated in the C. elegans Intestine Is Neuroprotective. *Cell*  
1520 *Rep* **16**, 2399-2414, doi:10.1016/j.celrep.2016.07.077 (2016).
- 1521
